# Supplementary material for: Long-Read Sequencing of Chicken Transcripts and Identification of New Transcript Isoforms
Source: PLoS One. 2014 Apr 15;9(4):e94650. doi: 10.1371/journal.pone.0094650 (PMC3988055; doi:10.1371/journal.pone.0094650)
Supplement: File S3 — A bed formatted file containing the galGal4 locations of isoforms within new genic regions not seen in the current Ensembl annotation that exhibited differentially expression among the different tissues examined in this study. (BED) [file pone.0094650.s003.bed]

chr	start	stop	id	BrainF	BrainM	CerebellumF	CerebellumM	HeartF	HeartM	KidneyF	KidneyM	LiverF	LiverM	TestesM.1	TestedM.2
chr1	650527	652496	iso_7	6	8	6	13	4	7	19	23	10	7	254	273
chr1	651727	653376	iso_8	12	5	6	4	3	5	27	25	11	15	919	559
chr1	731388	734459	iso_10	86	79	73	78	10	20	22	18	8	6	1350	2851
chr1	731388	734513	iso_9	87	79	74	78	10	20	22	18	9	6	1352	2855
chr1	731399	734513	iso_11	87	79	74	78	10	20	22	18	9	6	1352	2855
chr1	30025393	30030771	iso_109	225	248	394	641	370	323	201	186	252	57	49	247
chr1	30690671	30692684	iso_8821	49	37	54	105	20	27	69	31	45	50	350	203
chr1	47778457	47779340	iso_186	80	69	100	125	104	93	236	120	62	75	168	214
chr1	47780522	47782948	iso_187	91	69	72	113	274	196	416	315	240	114	626	371
chr1	57069326	57070145	iso_9218	965	537	432	737	2308	4556	2480	1510	1591	2851	4918	2955
chr1	57069326	57070145	iso_8553	965	537	432	737	2308	4556	2480	1510	1591	2851	4918	2955
chr1	71379977	71381126	iso_368	17	34	106	135	20	30	10	15	2	1	4	8
chr1	76658765	76661579	iso_443	1211	1175	1964	2339	1719	1417	6509	5196	11360	4965	961	3084
chr1	76658765	76661579	iso_444	1211	1175	1964	2339	1719	1417	6509	5196	11360	4965	961	3084
chr1	76658765	76661579	iso_442	1211	1175	1964	2339	1719	1417	6509	5196	11360	4965	961	3084
chr1	76658766	76661579	iso_446	1211	1175	1964	2339	1719	1417	6509	5196	11360	4965	961	3084
chr1	76658766	76661579	iso_445	1211	1175	1964	2339	1719	1417	6509	5196	11360	4965	961	3084
chr1	77940787	77943635	iso_496	172	105	128	153	71	23	41	39	19	12	742	952
chr1	104977568	104978718	iso_668	56	45	19	16	2	1	13	12	0	0	42	139
chr1	121022267	121022928	iso_752	0	0	2	1	0	0	0	1	0	0	127	65
chr1	123446938	123451108	iso_768	688	622	658	888	387	419	1203	1075	1115	861	714	853
chr1	131661213	131663544	iso_794	759	525	594	624	498	609	394	466	319	214	1046	1183
chr1	135733985	135735112	iso_821	65	49	107	144	19	18	32	46	19	2	78	131
chr1	185090611	185092067	iso_1021	16	7	39	23	7	6	15	20	11	5	78	214
chr10	3409419	3412399	iso_1145	6	5	20	12	344	572	46	38	65	58	106	320
chr10	10221785	10228083	iso_8543	459	358	427	659	167	96	123	130	173	84	415	714
chr11	10642625	10646893	iso_1428	27	29	54	49	20	18	2399	1504	1518	557	44	175
chr11	10646031	10649544	iso_1429	10	14	12	21	5	6	573	473	124	55	7	51
chr11	19148487	19149070	iso_1498	3	3	10	25	1	0	5	1	1	0	175	434
chr11	19149047	19149830	iso_1499	5	2	16	44	2	1	6	3	5	0	289	622
chr11	19150165	19150640	iso_1500	1	1	11	25	4	1	1	2	3	0	112	211
chr12	663735	664734	iso_1522	346	176	203	278	424	665	296	325	142	331	158	109
chr12	663735	664734	iso_1521	346	176	203	278	424	665	296	325	142	331	158	109
chr12	2279249	2280162	iso_1532	76	71	43	167	281	151	714	148	383	293	30	61
chr12	2483993	2484633	iso_1536	81	56	100	68	154	85	224	97	88	195	55	44
chr12	2484711	2485260	iso_1537	60	31	42	47	41	46	80	48	32	103	31	13
chr12	2486216	2487000	iso_1538	77	51	98	79	168	98	270	215	115	374	106	32
chr12	3229748	3230327	iso_1554	0	0	0	0	87	246	2	2	0	1	34	14
chr12	3275160	3275503	iso_1555	2	0	9	7	2	3	3	1	0	1	34	15
chr12	11625046	11626239	iso_1641	943	590	331	411	679	516	387	267	611	307	257	412
chr12	19722345	19723432	iso_1682	90	84	107	125	39	51	41	31	37	10	38	85
chr13	383346	383741	iso_1688	44	23	37	70	33	52	86	96	58	141	79	28
chr13	861249	877813	iso_1694	2002	1336	2917	3212	689	616	1349	1123	1034	531	365	604
chr13	12778341	12781689	iso_8810	71	59	49	51	15	10	62	24	38	36	592	777
chr13	12778341	12781693	iso_1814	71	59	49	51	16	10	62	24	38	36	592	778
chr13	12778341	12781693	iso_9348	71	59	49	51	16	10	62	24	38	36	592	778
chr14	3238737	3241482	iso_1952	2780	1723	2160	1443	284	311	570	675	222	193	443	676
chr14	4719675	4722613	iso_1979	123	88	154	147	309	354	262	320	155	231	1023	1113
chr14	13887620	13892975	iso_2114	73	55	108	121	129	73	142	105	125	60	249	675
chr14	13887620	13893033	iso_2115	74	55	108	122	129	73	143	106	125	60	251	675
chr15	4505440	4506947	iso_2189	5372	4439	4762	4814	5903	7264	7225	4957	7420	5146	35121	36107
chr15	5594849	5597588	iso_2223	5	4	5	8	7	4	4	4	1	0	893	1415
chr15	6957291	6961125	iso_2266	161	152	197	296	70	87	108	122	39	18	386	1137
chr15	7852057	7852758	iso_2280	72	60	105	162	64	55	88	55	56	110	149	57
chr15	7853377	7853715	iso_2282	30	25	48	67	14	18	21	33	22	48	57	20
chr15	9276823	9278292	iso_2326	19	11	13	13	81	108	27	16	35	63	3294	2423
chr15	9960423	9965778	iso_2351	451	334	495	457	485	302	277	250	304	118	534	1154
chr15	10803863	10804482	iso_2357	30	17	14	27	12	77	73	62	46	206	96	9
chr17	70376	120059	iso_2413	236	136	28	47	296	287	11	4	4	1	19827	22253
chr17	1558994	1562112	iso_2457	81	48	132	100	101	109	165	115	104	68	3035	3029
chr17	2403669	2405919	iso_2471	199	125	10	40	2	2	1	1	0	0	18	7
chr17	4992687	4994885	iso_2492	407	296	272	278	181	190	361	409	472	399	1536	1785
chr17	4992687	4994885	iso_2491	407	296	272	278	181	190	361	409	472	399	1536	1785
chr17	5322940	5325886	iso_2508	29	22	16	22	33	31	874	808	41	60	18	11
chr17	5820610	5823772	iso_2525	67	40	111	66	64	55	137	107	88	23	213	417
chr18	6762597	6763516	iso_2691	7	1	9	10	6	9	19	7	22	20	218	169
chr18	9828277	9830443	iso_2727	78	57	53	107	97	84	209	187	197	465	233	136
chr18	9830421	9832860	iso_2728	55	42	46	95	52	64	130	124	119	292	197	55
chr19	85686	87283	iso_2782	85	87	88	108	31	38	71	77	67	36	168	379
chr19	92082	92796	iso_8407	698	257	206	503	49	58	285	76	86	66	284	238
chr19	595001	598812	iso_2791	518	393	464	471	187	178	607	725	420	310	206	352
chr19	4344102	4345265	iso_2833	10	15	14	21	5	8	55	25	14	9	82	86
chr19	6171903	6173999	iso_2891	20	25	43	50	14	17	16	6	17	4	581	1336
chr19	6182693	6185366	iso_2894	19	35	44	56	15	23	15	18	7	2	566	783
chr19	6775233	6776413	iso_2924	13	8	2	8	2	2	7	6	4	7	265	346
chr2	306172	307894	iso_2990	293	177	344	396	188	347	713	664	317	671	323	108
chr2	15314651	15316382	iso_3095	45	34	31	46	26	23	66	57	50	24	196	532
chr2	32254522	32255961	iso_3191	10	4	5	3	2	0	3	5	8	8	6676	7690
chr2	143302806	143309618	iso_3680	2	3	7	16	10	20	51	91	6	9	389	514
chr20	2966572	2969268	iso_3759	0	0	0	1	1016	865	1	0	4	0	15	34
chr20	4167661	4169080	iso_3762	53	37	20	42	23	19	44	41	44	27	317	962
chr20	11230698	11231968	iso_9150	1124	669	792	881	3603	6015	2299	2341	1514	2321	2816	2315
chr21	628226	629309	iso_3902	147	92	16	57	17	19	25	54	7	7	47	21
chr21	668883	669882	iso_8900	814	513	510	608	150	182	97	99	48	97	370	222
chr21	1240274	1244025	iso_3914	276	223	8	23	519	438	1609	781	5	0	11	15
chr21	6443748	6448738	iso_4027	81	46	21	24	27	11	111	60	23	3	449	1104
chr21	6528410	6530226	iso_4029	44	19	16	30	117	219	153	73	26	40	214	93
chr21	6530992	6532086	iso_4030	47	26	41	70	177	313	109	81	25	70	267	85
chr21	6532105	6536969	iso_4031	217	109	129	218	917	1384	412	479	94	295	1111	308
chr21	6536982	6540276	iso_4032	111	66	75	94	490	735	226	272	61	213	654	162
chr21	6540301	6541626	iso_4033	66	53	64	88	528	682	176	272	47	204	610	110
chr21	6541119	6544316	iso_4034	153	70	101	102	815	866	281	348	112	243	625	177
chr21	6541868	6545457	iso_4035	197	84	129	137	1085	1197	382	440	152	330	825	262
chr21	6543041	6544316	iso_4036	64	29	42	42	320	420	93	157	37	121	266	72
chr21	6544325	6544769	iso_4037	45	22	25	36	293	349	74	108	26	91	216	51
chr21	6545016	6556539	iso_4038	575	330	377	585	4366	5858	1695	1922	574	2153	3534	1141
chr21	6584222	6586403	iso_4039	1012	820	760	1175	73	58	240	239	12	22	89	66
chr22	8833	12529	iso_4043	869	528	850	996	266	227	440	473	300	270	258	247
chr22	2802970	2805327	iso_9491	36	37	33	30	109	77	79	438	57	218	218	177
chr22	2802970	2805682	iso_8654	45	45	44	41	131	100	95	564	66	260	258	202
chr23	2138186	2138574	iso_4133	29	27	16	97	20	11	92	45	31	62	3	1
chr23	2350536	2353665	iso_9380	279	248	318	420	229	237	385	366	178	123	167	366
chr23	2501714	2504603	iso_4146	58	23	63	58	11	11	59	62	38	15	201	393
chr23	3152770	3153565	iso_4156	32	13	25	25	9	6	29	12	18	11	111	93
chr23	3178313	3180744	iso_8560	45	26	52	92	689	934	149	180	29	82	55	17
chr23	4163709	4166542	iso_8551	850	521	1121	941	507	547	491	692	463	414	1222	1009
chr23	5050972	5054777	iso_4190	339	304	389	571	137	240	127	240	118	129	252	228
chr24	2898208	2900045	iso_8890	473	308	547	353	98	71	371	489	51	35	113	134
chr24	5483750	5493840	iso_4294	290	254	437	492	284	263	342	406	401	196	1523	2430
chr24	6222593	6225790	iso_4306	21	18	45	87	8	12	574	661	167	56	57	91
chr25	462742	464226	iso_4320	57	36	146	127	92	76	84	103	47	66	3218	2513
chr25	1268010	1270368	iso_4331	206	83	101	151	235	186	1042	449	362	559	135	147
chr26	178003	179929	iso_4382	63	37	81	84	34	65	148	63	65	55	870	1116
chr26	2584773	2585467	iso_4440	13	8	5	9	17	11	8	14	460	1072	10	11
chr26	2585675	2586379	iso_4441	7	7	13	3	13	15	16	20	450	1368	13	4
chr26	4617188	4626095	iso_4478	429	314	540	759	202	206	210	246	272	647	2457	1855
chr26	5019489	5020522	iso_4489	661	399	292	467	790	1966	895	788	511	1469	2416	664
chr27	1251444	1253503	iso_4507	17	10	19	21	30	11	9	11	17	5	159	137
chr27	3871764	3872784	iso_4558	262	204	143	247	34	41	611	1453	480	535	95	87
chr27	5032251	5034706	iso_8865	293	219	259	436	679	791	656	707	561	514	1536	1259
chr27	5032251	5034708	iso_8525	293	219	259	436	679	791	656	707	561	514	1536	1259
chr27	5032251	5034708	iso_8735	293	219	259	436	679	791	656	707	561	514	1536	1259
chr27	5032251	5034708	iso_9112	293	219	259	436	679	791	656	707	561	514	1536	1259
chr27	5078222	5081805	iso_4582	42	29	22	21	2997	2434	251	428	189	439	236	127
chr27	5081929	5087475	iso_4583	4	3	2	1	422	439	9248	7301	17280	10964	33	25
chr28	8860	12354	iso_4596	113	53	67	83	135	102	427	308	185	79	421	288
chr28	8860	12354	iso_4595	113	53	67	83	135	102	427	308	185	79	421	288
chr28	8860	12742	iso_4597	118	56	72	85	135	104	429	311	187	79	486	423
chr28	1459396	1462627	iso_4617	4	2	15	5	149	94	1	0	3	0	600	536
chr28	3207117	3208408	iso_4654	184	610	132	1106	637	439	792	769	1489	4154	309	378
chr28	3317722	3319092	iso_4656	919	419	161	189	1	0	0	0	0	0	42	17
chr28	3319071	3319595	iso_4657	603	287	111	106	0	0	0	0	0	0	29	7
chr28	3654970	3655605	iso_4675	72	29	83	86	23	29	51	31	31	34	122	118
chr28	4053690	4055720	iso_4688	445	318	540	553	635	594	629	616	475	615	1232	1017
chr28	4053694	4055720	iso_4689	445	318	540	553	635	594	629	616	475	615	1232	1017
chr28	4053751	4055720	iso_4690	444	318	540	552	635	591	628	616	475	615	1227	1007
chr3	9639717	9641294	iso_4792	22	10	19	12	12	9	25	10	3	3	380	413
chr3	19516511	19519538	iso_4876	20	12	152	190	260	285	73	110	8	3	14	28
chr3	19516511	19519538	iso_9027	20	12	152	190	260	285	73	110	8	3	14	28
chr3	19516511	19519538	iso_4875	20	12	152	190	260	285	73	110	8	3	14	28
chr3	29662574	29665489	iso_8415	110	68	672	908	705	862	308	353	36	97	199	107
chr3	62472203	62479201	iso_5156	34	18	7	9	35	26	20	21	2	2	7698	5660
chr3	104175321	104177329	iso_5357	265	184	166	178	98	90	237	309	32	101	1334	259
chr3	104828736	104835280	iso_5369	11716	10358	13345	20535	2735	9144	1908	1978	1064	1628	23577	16872
chr3	109419645	109423018	iso_5402	71	51	159	176	155	112	153	114	3950	855	38	79
chr4	14155416	14162531	iso_5547	3129	2351	3047	3221	378	331	928	673	541	255	753	1770
chr4	14172819	14184240	iso_5548	894	756	1305	1381	1360	1562	3492	3853	2841	1486	1223	1612
chr4	28733226	28734982	iso_5624	251	161	239	281	503	568	341	295	330	208	648	848
chr4	28733226	28735276	iso_5625	363	219	266	381	534	641	416	331	375	285	963	952
chr4	34488353	34493082	iso_9240	279	329	214	545	99	75	120	146	371	233	129	360
chr4	45788797	45797400	iso_8270	5090	3682	2574	2468	55	49	215	156	69	57	5495	6973
chr4	54138898	54140080	iso_5801	231	284	194	307	428	609	298	523	378	348	350	445
chr5	12446641	12448804	iso_6155	20	8	11	22	55	128	140	192	129	55	99	380
chr5	36977911	36978256	iso_6375	20	19	15	20	6	6	15	5	5	4	100	23
chr6	10214222	10214734	iso_6618	0	0	0	0	0	0	0	0	0	0	44	64
chr6	11094074	11095199	iso_6632	195	136	103	149	224	325	331	176	289	197	79	125
chr6	15983108	15993117	iso_6671	1186	866	296	259	5311	3550	699	753	407	186	195	329
chr6	15983325	15998219	iso_6672	2546	1895	696	704	11502	7119	1622	1714	1078	531	486	1215
chr6	15993875	15998219	iso_6673	1399	1029	434	457	6178	3462	947	982	684	349	311	922
chr6	21951485	21951924	iso_6719	111	122	33	48	7	6	4	4	0	0	6	13
chr6	21952044	21952904	iso_6720	134	121	29	42	3	4	1	2	0	0	10	31
chr6	21952970	21953530	iso_6721	212	216	70	69	10	9	10	12	0	0	48	72
chr6	21953608	21956365	iso_6722	339	290	64	93	7	16	8	10	0	0	25	86
chr6	21957692	21958225	iso_6723	144	120	25	46	3	4	7	3	0	1	25	101
chr6	21958269	21958803	iso_6724	246	208	39	77	3	20	4	10	0	1	39	102
chr6	21958785	21959164	iso_6725	271	264	60	90	5	17	6	10	0	0	36	154
chr7	560984	564307	iso_6837	44	49	36	57	1141	675	239	502	422	235	619	1612
chr7	9512979	9514956	iso_6884	10	10	4	5	12	3	23	23	11	1	52	156
chr7	21752173	21757655	iso_7041	288	240	399	384	1082	1467	1680	1605	3609	2527	1220	1573
chr7	22129741	22141339	iso_7048	549	349	665	764	4774	6473	1569	1588	258	471	552	318
chr7	22141506	22147151	iso_7049	729	418	796	990	10185	10954	3040	3092	470	723	637	716
chr7	27471135	27472311	iso_7076	126	57	97	121	108	119	30	65	9	11	10	9
chr8	24186141	24189126	iso_7384	388	317	373	416	940	833	826	967	503	255	151	332
chr8	27165460	27166403	iso_7406	14	15	4	15	14	19	21	24	9	13	201	143
chr9	14769492	14775345	iso_7564	179	125	393	587	1132	2108	81	73	25	16	266	195
chr9	14804111	14807864	iso_7566	1758	1141	2810	2456	2544	1774	4895	1928	4104	1365	1036	4183
chr9	14804111	14807864	iso_8544	1758	1141	2810	2456	2544	1774	4895	1928	4104	1365	1036	4183
chr9	14804111	14807864	iso_7565	1758	1141	2810	2456	2544	1774	4895	1928	4104	1365	1036	4183
chrZ	1754070	1756906	iso_8885	180	165	254	336	274	276	335	420	370	241	723	748
chrZ	7768022	7770168	iso_7880	134	201	182	368	147	288	164	513	282	407	468	582
chrZ	8229242	8231931	iso_7884	9	32	2	32	76	158	297	1568	216	126	186	553
