# Supplementary material for: Long-Read Sequencing of Chicken Transcripts and Identification of New Transcript Isoforms
Source: PLoS One. 2014 Apr 15;9(4):e94650. doi: 10.1371/journal.pone.0094650 (PMC3988055; doi:10.1371/journal.pone.0094650)
Supplement: File S4 — A bed formatted file containing the galGal4 locations of the new isoforms not seen in the current Ensembl annotation that exhibited differentially expression among the different tissues examined in this study. (BED) [file pone.0094650.s004.bed]

chr	start	stop	id	BrainF	BrainM	CerebellumF	CerebellumM	HeartF	HeartM	KidneyF	KidneyM	LiverF	LiverM	TestesM.1	TestedM.2
chr1	650527	652496	iso_7	6	8	6	13	4	7	19	23	10	7	254	273
chr1	651727	653376	iso_8	12	5	6	4	3	5	27	25	11	15	919	559
chr1	731388	734459	iso_10	86	79	73	78	10	20	22	18	8	6	1350	2851
chr1	731388	734513	iso_9	87	79	74	78	10	20	22	18	9	6	1352	2855
chr1	731399	734513	iso_11	87	79	74	78	10	20	22	18	9	6	1352	2855
chr1	3021378	3026149	iso_17	708	494	664	636	3845	2182	1782	1792	137	119	114	209
chr1	3021378	3026165	iso_16	710	497	666	638	3852	2187	1795	1806	139	119	115	211
chr1	7305869	7316800	iso_8733	174	115	200	200	102	93	178	152	170	52	509	1106
chr1	7309940	7313600	iso_36	50	38	94	71	41	28	59	54	60	14	213	528
chr1	13821836	13823393	iso_51	77	64	35	54	16	12	41	19	5	7	550	1074
chr1	14624202	14627999	iso_59	407	276	456	410	228	240	414	380	270	248	739	872
chr1	30025393	30030771	iso_109	225	248	394	641	370	323	201	186	252	57	49	247
chr1	30690671	30692684	iso_8821	49	37	54	105	20	27	69	31	45	50	350	203
chr1	34765296	34771245	iso_125	561	408	468	506	161	127	373	393	367	188	752	1818
chr1	40127377	40132890	iso_149	396	363	668	751	21	31	38	59	132	139	268	395
chr1	44708214	44713541	iso_157	1036	989	891	1085	614	723	3476	2332	1196	553	247	643
chr1	44743619	44750873	iso_8458	316	233	926	908	377	344	207	207	304	151	181	274
chr1	44743619	44750873	iso_158	316	233	926	908	377	344	207	207	304	151	181	274
chr1	46514860	46525604	iso_8729	4554	3384	3591	4342	8135	8894	3204	3970	3933	2733	1832	3117
chr1	46521567	46522799	iso_176	878	761	730	942	3231	3224	963	1413	1339	1012	556	1041
chr1	47778457	47779340	iso_186	80	69	100	125	104	93	236	120	62	75	168	214
chr1	47780522	47782948	iso_187	91	69	72	113	274	196	416	315	240	114	626	371
chr1	49057135	49060758	iso_191	171	112	171	143	187	150	272	236	203	197	2172	2199
chr1	49274735	49276298	iso_198	336	178	293	349	676	1149	996	596	585	1149	2199	987
chr1	49274735	49276298	iso_197	336	178	293	349	676	1149	996	596	585	1149	2199	987
chr1	49288743	49297083	iso_199	1663	1184	1357	1298	1282	1451	1210	1460	670	683	2742	2999
chr1	49318310	49323941	iso_200	11	7	26	32	3	1	7	8	6	3	3108	2698
chr1	49444492	49449238	iso_205	1553	1037	1457	1344	140	262	1451	2622	950	1697	114	163
chr1	50456701	50458504	iso_216	2083	1692	2882	3632	2707	3273	3818	5178	6089	3702	552	1571
chr1	50703947	50706210	iso_222	478	311	139	149	39	57	153	117	28	81	3792	3107
chr1	51063848	51070071	iso_230	111	96	127	151	881	741	1415	1218	3921	3900	178	149
chr1	51454631	51463442	iso_8329	1626	686	5582	5852	23	14	6	1	2	0	8	36
chr1	51477501	51481734	iso_9098	261	176	126	158	23	25	70	43	32	7	197	782
chr1	51479961	51488839	iso_235	843	605	435	496	82	58	157	113	80	15	193	951
chr1	51555095	51562485	iso_236	1211	681	1188	1190	2873	2116	1760	1600	1841	985	2501	3329
chr1	54867653	54879302	iso_255	4626	3505	4846	5109	4166	3044	12007	10033	28790	13612	7159	24579
chr1	54867653	54879302	iso_256	4626	3505	4846	5109	4166	3044	12007	10033	28790	13612	7159	24579
chr1	57069326	57070145	iso_9218	965	537	432	737	2308	4556	2480	1510	1591	2851	4918	2955
chr1	57069326	57070145	iso_8553	965	537	432	737	2308	4556	2480	1510	1591	2851	4918	2955
chr1	60501939	60504985	iso_298	335	231	390	396	12	35	14	25	0	0	373	623
chr1	63429440	63436232	iso_326	763	574	333	400	984	1058	3006	2708	6264	3190	1021	2019
chr1	63429440	63436232	iso_324	763	574	333	400	984	1058	3006	2708	6264	3190	1021	2019
chr1	63429440	63436232	iso_325	763	574	333	400	984	1058	3006	2708	6264	3190	1021	2019
chr1	63429440	63436232	iso_327	763	574	333	400	984	1058	3006	2708	6264	3190	1021	2019
chr1	63429445	63436232	iso_322	762	574	333	400	984	1058	3006	2708	6264	3189	1021	2019
chr1	63429477	63436232	iso_328	761	574	333	400	984	1058	3005	2708	6264	3186	1006	2018
chr1	63429491	63436232	iso_323	761	574	333	400	984	1058	3005	2707	6264	3185	1002	2018
chr1	68677109	68679710	iso_360	121	95	299	331	70	56	94	77	130	62	44	93
chr1	71379977	71381126	iso_368	17	34	106	135	20	30	10	15	2	1	4	8
chr1	71437980	71443786	iso_372	62	49	142	154	300	498	346	419	944	291	98	262
chr1	75222844	75230470	iso_412	2619	1993	2463	2638	591	493	1046	951	1018	477	373	668
chr1	75660188	75666865	iso_420	1270	1122	1583	1691	666	541	1916	1520	2643	1201	680	1885
chr1	75713725	75715318	iso_421	25	7	78	60	5	5	1	1	2012	2767	16	11
chr1	76431597	76432016	iso_425	1	2	0	1	1	3	0	0	29	38	36	27
chr1	76434442	76437607	iso_433	28831	19178	26121	25360	34521	39295	23549	31421	34713	40935	42314	33150
chr1	76434442	76437607	iso_432	28831	19178	26121	25360	34521	39295	23549	31421	34713	40935	42314	33150
chr1	76434619	76436310	iso_9371	19261	11776	16929	16611	19680	23140	15838	18268	22793	24947	27153	21976
chr1	76434619	76436318	iso_9379	19261	11776	16929	16611	19680	23140	15838	18268	22793	24947	27153	21976
chr1	76434619	76436621	iso_9305	19823	12314	17419	17125	20487	24103	16288	19048	23518	25879	27946	22516
chr1	76434619	76436621	iso_9386	19823	12314	17419	17125	20487	24103	16288	19048	23518	25879	27946	22516
chr1	76434619	76437498	iso_9416	28825	19168	26111	25336	34516	39281	23535	31411	34689	40910	42308	33120
chr1	76434619	76437498	iso_9414	28825	19168	26111	25336	34516	39281	23535	31411	34689	40910	42308	33120
chr1	76434619	76437498	iso_9304	28825	19168	26111	25336	34516	39281	23535	31411	34689	40910	42308	33120
chr1	76434619	76437607	iso_431	28825	19168	26111	25336	34516	39281	23535	31411	34689	40910	42308	33121
chr1	76434619	76437607	iso_9178	28825	19168	26111	25336	34516	39281	23535	31411	34689	40910	42308	33121
chr1	76434619	76437607	iso_8353	28825	19168	26111	25336	34516	39281	23535	31411	34689	40910	42308	33121
chr1	76434619	76437607	iso_429	28825	19168	26111	25336	34516	39281	23535	31411	34689	40910	42308	33121
chr1	76434619	76437607	iso_9447	28825	19168	26111	25336	34516	39281	23535	31411	34689	40910	42308	33121
chr1	76434619	76437607	iso_427	28825	19168	26111	25336	34516	39281	23535	31411	34689	40910	42308	33121
chr1	76434619	76437607	iso_9272	28825	19168	26111	25336	34516	39281	23535	31411	34689	40910	42308	33121
chr1	76434619	76437607	iso_426	28825	19168	26111	25336	34516	39281	23535	31411	34689	40910	42308	33121
chr1	76434619	76437607	iso_430	28825	19168	26111	25336	34516	39281	23535	31411	34689	40910	42308	33121
chr1	76434619	76437607	iso_8287	28825	19168	26111	25336	34516	39281	23535	31411	34689	40910	42308	33121
chr1	76434619	76437607	iso_428	28825	19168	26111	25336	34516	39281	23535	31411	34689	40910	42308	33121
chr1	76434619	76437607	iso_9325	28825	19168	26111	25336	34516	39281	23535	31411	34689	40910	42308	33121
chr1	76434619	76437607	iso_8363	28825	19168	26111	25336	34516	39281	23535	31411	34689	40910	42308	33121
chr1	76434619	76437607	iso_8256	28825	19168	26111	25336	34516	39281	23535	31411	34689	40910	42308	33121
chr1	76434619	76437607	iso_8420	28825	19168	26111	25336	34516	39281	23535	31411	34689	40910	42308	33121
chr1	76435021	76437607	iso_435	26168	18086	23896	23600	32716	36978	20219	29502	30798	37891	38962	29600
chr1	76435021	76437607	iso_434	26168	18086	23896	23600	32716	36978	20219	29502	30798	37891	38962	29600
chr1	76447680	76452466	iso_437	577	365	2036	2305	287	338	356	348	196	198	1489	1986
chr1	76447680	76452466	iso_436	577	365	2036	2305	287	338	356	348	196	198	1489	1986
chr1	76468778	76489753	iso_8763	2284	1599	3486	3235	2051	1468	3250	2422	1897	722	1897	5086
chr1	76548296	76551802	iso_438	316	278	327	393	126	77	272	203	234	83	330	1126
chr1	76658765	76661579	iso_443	1211	1175	1964	2339	1719	1417	6509	5196	11360	4965	961	3084
chr1	76658765	76661579	iso_444	1211	1175	1964	2339	1719	1417	6509	5196	11360	4965	961	3084
chr1	76658765	76661579	iso_442	1211	1175	1964	2339	1719	1417	6509	5196	11360	4965	961	3084
chr1	76658766	76661579	iso_446	1211	1175	1964	2339	1719	1417	6509	5196	11360	4965	961	3084
chr1	76658766	76661579	iso_445	1211	1175	1964	2339	1719	1417	6509	5196	11360	4965	961	3084
chr1	76736158	76737682	iso_448	1	2	3	1	3	1	5	8	8	3	625	896
chr1	76754059	76757062	iso_451	4263	3238	3316	4077	2575	2386	3819	4783	4410	2733	5638	8355
chr1	76754059	76757062	iso_450	4263	3238	3316	4077	2575	2386	3819	4783	4410	2733	5638	8355
chr1	76754059	76757063	iso_8667	4263	3238	3316	4077	2575	2386	3819	4783	4410	2733	5638	8355
chr1	76754059	76757063	iso_8572	4263	3238	3316	4077	2575	2386	3819	4783	4410	2733	5638	8355
chr1	76754059	76757063	iso_8489	4263	3238	3316	4077	2575	2386	3819	4783	4410	2733	5638	8355
chr1	76755101	76757063	iso_452	3862	2929	3128	3715	2460	2252	3593	4599	4169	2535	5208	7841
chr1	76834393	76839610	iso_456	234	172	236	265	204	176	311	302	450	315	736	1392
chr1	76916884	76924637	iso_459	459	357	587	680	413	499	1055	1279	1654	1015	488	618
chr1	77014766	77020153	iso_460	1085	768	1362	1303	759	709	1070	1529	950	991	380	671
chr1	77014766	77020153	iso_461	1085	768	1362	1303	759	709	1070	1529	950	991	380	671
chr1	77940787	77943635	iso_496	172	105	128	153	71	23	41	39	19	12	742	952
chr1	79568989	79569894	iso_516	3	7	3	4	0	0	15	7	2	0	128	780
chr1	79597104	79608451	iso_518	303	275	439	486	9035	11661	518	525	801	587	214	282
chr1	83037652	83038898	iso_537	17	12	26	18	4	7	57	49	663	301	4	9
chr1	83975092	83978000	iso_544	286	267	303	359	89	163	307	486	224	97	363	1002
chr1	84255580	84264962	iso_8793	227	160	295	219	192	160	1968	1286	917	431	1050	2385
chr1	84256523	84264962	iso_549	221	157	289	215	189	160	1964	1275	911	429	965	2339
chr1	86876565	86883122	iso_561	60	41	44	39	48284	27652	442	568	589	187	140	374
chr1	86876565	86887836	iso_562	84	50	49	44	119690	84422	474	622	613	191	161	389
chr1	86876565	86887836	iso_9374	84	50	49	44	119690	84422	474	622	613	191	161	389
chr1	86876565	86891407	iso_563	88	52	51	45	128651	88411	479	629	629	192	167	392
chr1	86876565	86892575	iso_9470	91	55	52	46	143382	101378	484	645	634	194	170	392
chr1	86876565	86892575	iso_9356	91	55	52	46	143382	101378	484	645	634	194	170	392
chr1	86876565	86893391	iso_564	95	56	52	47	156489	110384	491	650	638	195	173	395
chr1	86876565	86895146	iso_565	104	61	57	50	168856	117601	511	665	659	198	191	432
chr1	86876565	86895146	iso_8327	104	61	57	50	168856	117601	511	665	659	198	191	432
chr1	86876565	86896823	iso_9181	130	67	70	55	187832	134505	555	698	691	206	229	497
chr1	86876565	86896823	iso_566	130	67	70	55	187832	134505	555	698	691	206	229	497
chr1	86876565	86896823	iso_8739	130	67	70	55	187832	134505	555	698	691	206	229	497
chr1	86876565	86896823	iso_8774	130	67	70	55	187832	134505	555	698	691	206	229	497
chr1	86876565	86896823	iso_9307	130	67	70	55	187832	134505	555	698	691	206	229	497
chr1	86876565	86898014	iso_568	139	73	75	60	190752	135469	569	708	702	209	239	511
chr1	86876565	86898014	iso_567	139	73	75	60	190752	135469	569	708	702	209	239	511
chr1	86876565	86899089	iso_9442	141	75	77	61	196086	138427	573	710	709	210	244	522
chr1	86876565	86900301	iso_9157	150	76	83	71	207806	146656	588	722	728	216	250	542
chr1	86876565	86900301	iso_9190	150	76	83	71	207806	146656	588	722	728	216	250	542
chr1	86876565	86906915	iso_9196	176	93	104	85	224890	163243	638	765	796	234	275	579
chr1	86876565	86906915	iso_9175	176	93	104	85	224890	163243	638	765	796	234	275	579
chr1	86876565	86906915	iso_9207	176	93	104	85	224890	163243	638	765	796	234	275	579
chr1	86876565	86906915	iso_8245	176	93	104	85	224890	163243	638	765	796	234	275	579
chr1	86876565	86906915	iso_9230	176	93	104	85	224890	163243	638	765	796	234	275	579
chr1	86876565	86906915	iso_9114	176	93	104	85	224890	163243	638	765	796	234	275	579
chr1	86876565	86906915	iso_9255	176	93	104	85	224890	163243	638	765	796	234	275	579
chr1	86876565	86926770	iso_569	196	113	113	96	251483	191969	672	826	845	236	293	592
chr1	86880002	86893980	iso_571	59	28	18	24	161771	113527	129	269	137	61	66	61
chr1	86881301	86896823	iso_570	75	31	29	17	183235	131047	137	142	114	20	98	131
chr1	86899679	86904235	iso_572	25	15	16	16	19633	17507	48	42	63	21	20	42
chr1	86909303	86923797	iso_573	15	18	8	8	21127	24535	23	50	38	2	15	8
chr1	86917989	86926770	iso_574	1	4	1	3	9103	11621	7	16	8	0	6	1
chr1	91248216	91253015	iso_597	286	219	411	332	60	29	546	566	667	624	207	239
chr1	103278502	103281539	iso_625	124	107	110	124	168	127	163	122	60	34	337	435
chr1	103489258	103504405	iso_632	338	184	2411	2659	30	5	2	0	1	1	5	14
chr1	104205642	104210769	iso_638	353	222	259	228	61	44	169	88	107	53	797	2121
chr1	104205642	104210769	iso_640	353	222	259	228	61	44	169	88	107	53	797	2121
chr1	104205642	104210769	iso_641	353	222	259	228	61	44	169	88	107	53	797	2121
chr1	104205642	104210769	iso_639	353	222	259	228	61	44	169	88	107	53	797	2121
chr1	104412975	104433430	iso_646	3439	2543	3654	4086	398	271	245	378	255	112	424	1109
chr1	104774368	104781956	iso_654	841	477	1404	1237	997	385	803	602	1016	227	1040	2050
chr1	104775100	104781956	iso_655	819	467	1382	1209	985	374	785	585	1011	203	885	1995
chr1	104809349	104811636	iso_656	603	498	902	953	544	475	700	791	732	448	913	1848
chr1	104810108	104812488	iso_657	677	570	938	1034	591	507	616	810	682	487	949	1504
chr1	104977568	104978718	iso_668	56	45	19	16	2	1	13	12	0	0	42	139
chr1	105950567	105957689	iso_672	801	752	624	720	414	557	6720	6897	556	482	574	869
chr1	105987892	105990110	iso_674	174	116	385	429	42	41	268	454	13	8	74	199
chr1	106904626	106907265	iso_683	7	4	13	13	25	13	800	2358	14	2	4	5
chr1	107369097	107376065	iso_688	519	422	472	595	188	160	194	206	186	99	627	1899
chr1	107369097	107376065	iso_687	519	422	472	595	188	160	194	206	186	99	627	1899
chr1	111363416	111366823	iso_705	2136	1676	3282	3059	2486	2438	4342	5105	2351	1468	2638	3276
chr1	111403848	111406340	iso_9434	2521	1380	2637	2405	4845	3909	4042	5505	3048	3348	7829	4013
chr1	111403848	111407583	iso_9367	3571	2073	3623	3329	7492	6477	7397	9119	5679	5591	12110	7659
chr1	111403848	111407585	iso_8400	3571	2073	3623	3329	7492	6477	7397	9119	5679	5591	12110	7659
chr1	111611757	111616007	iso_708	1567	1395	1252	1730	325	317	1203	1517	613	237	278	720
chr1	117759376	117761849	iso_731	870	892	520	811	851	1000	1519	2041	2102	1514	563	847
chr1	117759376	117762351	iso_8341	871	892	521	811	851	1001	1520	2042	2102	1517	563	848
chr1	121022267	121022928	iso_752	0	0	2	1	0	0	0	1	0	0	127	65
chr1	122807084	122808723	iso_764	3216	3138	3508	4640	3606	1696	2992	2170	5236	1731	802	2630
chr1	122807084	122808765	iso_765	3216	3138	3508	4640	3606	1696	2993	2170	5236	1731	802	2630
chr1	122807084	122808767	iso_766	3216	3138	3508	4640	3606	1696	2993	2170	5236	1731	802	2630
chr1	123446938	123451108	iso_768	688	622	658	888	387	419	1203	1075	1115	861	714	853
chr1	127916852	127920639	iso_9433	77	83	84	140	628	338	121	156	97	22	461	1987
chr1	128508688	128513224	iso_785	8736	5860	9212	9332	4281	3550	23517	29243	13838	10122	1277	2332
chr1	131661213	131663544	iso_794	759	525	594	624	498	609	394	466	319	214	1046	1183
chr1	132815207	132820280	iso_803	372	317	416	593	161	163	211	270	307	136	640	1798
chr1	134495671	134510184	iso_809	133	106	470	420	16780	23724	87	310	14	54	70	117
chr1	135733985	135735112	iso_821	65	49	107	144	19	18	32	46	19	2	78	131
chr1	135778708	135788728	iso_9473	624	525	715	846	466	311	622	641	747	211	537	1867
chr1	135778708	135793415	iso_9082	939	772	1126	1254	800	601	1091	1158	1253	378	882	3165
chr1	138576011	138596126	iso_834	1206	1028	2809	3300	1158	777	901	797	386	130	449	1070
chr1	140312149	140323428	iso_837	2310	1761	2482	3803	1294	969	2824	1569	1705	681	1396	3618
chr1	140312149	140323428	iso_838	2310	1761	2482	3803	1294	969	2824	1569	1705	681	1396	3618
chr1	167062085	167066360	iso_894	3983	2472	3438	4416	11776	10531	11139	7596	10152	5197	3855	10296
chr1	167062085	167066360	iso_892	3983	2472	3438	4416	11776	10531	11139	7596	10152	5197	3855	10296
chr1	167062085	167066360	iso_895	3983	2472	3438	4416	11776	10531	11139	7596	10152	5197	3855	10296
chr1	167062085	167066360	iso_893	3983	2472	3438	4416	11776	10531	11139	7596	10152	5197	3855	10296
chr1	167062085	167066360	iso_896	3983	2472	3438	4416	11776	10531	11139	7596	10152	5197	3855	10296
chr1	167630824	167632085	iso_906	62	58	65	56	67	38	338	292	351	129	41	98
chr1	169658546	169662399	iso_925	84	76	75	81	44	24	146	100	109	64	618	1234
chr1	175568177	175576831	iso_966	2200	1894	3031	3734	4363	3752	4918	6223	4597	2558	3198	5566
chr1	175568177	175577124	iso_967	2216	1902	3047	3745	4392	3767	4952	6248	4613	2580	3217	5580
chr1	175568177	175577124	iso_968	2216	1902	3047	3745	4392	3767	4952	6248	4613	2580	3217	5580
chr1	175568177	175577138	iso_969	2216	1902	3047	3745	4392	3767	4952	6248	4613	2580	3218	5580
chr1	175568177	175577138	iso_971	2216	1902	3047	3745	4392	3767	4952	6248	4613	2580	3218	5580
chr1	175568177	175577138	iso_972	2216	1902	3047	3745	4392	3767	4952	6248	4613	2580	3218	5580
chr1	175568177	175577138	iso_973	2216	1902	3047	3745	4392	3767	4952	6248	4613	2580	3218	5580
chr1	175568177	175577138	iso_970	2216	1902	3047	3745	4392	3767	4952	6248	4613	2580	3218	5580
chr1	181600188	181602936	iso_998	142	84	93	109	52	37	57	66	78	23	299	974
chr1	184877954	184880748	iso_1010	142	78	120	103	64	56	113	88	112	21	233	481
chr1	185068648	185071192	iso_1019	112	114	200	223	134	76	282	342	224	126	140	295
chr1	185090611	185092067	iso_1021	16	7	39	23	7	6	15	20	11	5	78	214
chr1	193335777	193338826	iso_1062	3	0	0	1	298	317	1	5	471	653	4	13
chr1	193529915	193533111	iso_1065	534	357	335	590	871	1299	3878	3163	1329	4276	750	303
chr1	193589381	193591868	iso_1067	1025	604	1014	1155	164	285	381	401	176	507	495	182
chr1	193634348	193637661	iso_1068	1988	1256	2353	2181	4768	4141	4012	5800	2721	4005	6574	3255
chr1	193724308	193725803	iso_1085	780	405	1031	844	8680	9056	1307	5472	1847	2042	143	131
chr1	194552170	194554111	iso_1098	292	138	397	332	0	1	2	2	0	0	184	57
chr1	194710236	194712324	iso_1099	641	326	1376	1475	21	21	146	111	21	32	394	189
chr1	194928459	194931228	iso_1105	512	419	388	555	243	204	608	531	770	589	530	1257
chr1	194928465	194936619	iso_1104	560	458	444	629	270	225	716	611	880	675	867	2081
chr10	715022	715374	iso_1112	8	10	6	21	3	7	12	8	6	19	249	64
chr10	807602	809257	iso_1114	94	44	70	92	130	248	134	105	283	495	42	34
chr10	827906	829757	iso_1115	1833	3319	1358	5006	7572	10695	40373	20755	14298	25211	2552	3127
chr10	867668	869309	iso_1116	655	410	610	556	39	56	14	17	3	10	100	54
chr10	1100765	1106368	iso_1119	1447	876	1095	1316	254	277	226	327	99	82	3981	2739
chr10	1891961	1896140	iso_9222	1385	871	1102	1337	5439	6942	2087	2527	2494	2894	2298	1534
chr10	2044018	2055539	iso_1132	1387	977	964	1255	1369	1097	560	435	360	468	2943	2989
chr10	2889654	2890339	iso_1138	98	75	686	604	117	145	497	500	145	166	315	178
chr10	3237333	3243207	iso_1143	704	644	1081	1672	1396	1938	1200	2218	1151	1075	1807	5177
chr10	3409419	3412399	iso_1145	6	5	20	12	344	572	46	38	65	58	106	320
chr10	3614126	3624700	iso_1152	488	409	459	712	328	241	729	769	1541	428	562	2758
chr10	6388030	6390446	iso_1179	90	82	146	186	127	43	155	48	120	15	62	699
chr10	8418107	8431357	iso_1202	6800	4966	6817	6443	4020	6639	4470	3075	2496	916	1403	4724
chr10	9547175	9552231	iso_1211	401	303	469	572	144	85	145	171	101	25	269	1178
chr10	10218101	10219975	iso_1222	3466	2008	3022	2560	15267	10341	2718	2683	2084	790	3901	6480
chr10	10218101	10220275	iso_8933	3990	2260	3498	2890	17109	13130	3087	3084	2238	1090	5938	6835
chr10	10218225	10218909	iso_1223	1508	940	1358	1101	7490	5327	1236	1413	978	400	1908	3054
chr10	10221785	10228083	iso_8543	459	358	427	659	167	96	123	130	173	84	415	714
chr10	10672686	10675906	iso_1238	285	238	343	411	212	186	355	584	271	125	398	1040
chr10	10672686	10675906	iso_1235	285	238	343	411	212	186	355	584	271	125	398	1040
chr10	10672686	10675906	iso_1237	285	238	343	411	212	186	355	584	271	125	398	1040
chr10	10672686	10675906	iso_1239	285	238	343	411	212	186	355	584	271	125	398	1040
chr10	10672686	10675906	iso_1234	285	238	343	411	212	186	355	584	271	125	398	1040
chr10	10672686	10675906	iso_1236	285	238	343	411	212	186	355	584	271	125	398	1040
chr10	10672944	10675906	iso_1240	279	233	339	408	211	184	344	582	268	118	377	1034
chr10	18000212	18005596	iso_1277	3110	2084	4267	4812	6468	4868	8861	7799	5460	4233	13032	12747
chr10	18002275	18005596	iso_1278	1213	885	1864	1888	2595	2471	3871	4410	2606	2607	8399	5592
chr10	18368286	18368957	iso_1283	9	1	0	5	1	1	8	4	1	0	26	253
chr10	19416855	19422357	iso_8655	256	233	212	278	411	347	1082	571	1906	1290	241	379
chr10	19497718	19501411	iso_1304	837	552	782	1142	711	941	1176	876	405	899	570	327
chr10	19497718	19501411	iso_8943	837	552	782	1142	711	941	1176	876	405	899	570	327
chr10	19497718	19501411	iso_1303	837	552	782	1142	711	941	1176	876	405	899	570	327
chr10	19537082	19538952	iso_1306	392	291	236	303	517	507	1313	1676	771	980	500	323
chr10	19537082	19539278	iso_1307	404	301	241	312	521	511	1334	1691	775	991	508	332
chr10	19537082	19539591	iso_1308	410	305	242	325	526	524	1420	1711	788	1011	519	349
chr10	19537082	19539591	iso_1309	410	305	242	325	526	524	1420	1711	788	1011	519	349
chr10	19537082	19539591	iso_1310	410	305	242	325	526	524	1420	1711	788	1011	519	349
chr10	19537087	19539591	iso_1305	410	305	242	325	526	524	1420	1711	788	1011	519	349
chr10	19554486	19560918	iso_1312	873	640	870	1189	841	969	1478	1182	648	611	1033	1296
chr10	19561556	19568341	iso_1313	99	94	165	210	196	227	166	253	145	214	2047	2669
chr10	19561556	19568341	iso_1314	99	94	165	210	196	227	166	253	145	214	2047	2669
chr10	19626873	19631300	iso_1315	1040	805	970	981	759	500	1462	1468	4077	2060	1157	3049
chr10	19689044	19698673	iso_1318	17482	12184	23860	17849	418	549	509	692	66	25	744	908
chr10	19698658	19719858	iso_1320	9406	5548	13090	9597	366	297	860	903	116	43	384	596
chr10	19698658	19719858	iso_1319	9406	5548	13090	9597	366	297	860	903	116	43	384	596
chr11	348456	364175	iso_1328	36867	24767	45871	53269	10670	17011	1518	1982	40	39	1336	1223
chr11	482304	485243	iso_1330	325	209	176	222	869	1364	689	481	163	321	96	67
chr11	485381	486008	iso_1331	64	54	20	47	248	465	102	111	21	94	31	7
chr11	488114	496324	iso_1332	295	219	220	279	114	78	134	107	73	35	2410	2926
chr11	572631	578658	iso_1339	1117	720	1227	1380	1024	1091	852	1024	833	879	754	926
chr11	572631	578658	iso_1337	1117	720	1227	1380	1024	1091	852	1024	833	879	754	926
chr11	572631	578658	iso_1338	1117	720	1227	1380	1024	1091	852	1024	833	879	754	926
chr11	572931	578658	iso_1340	1106	720	1217	1369	1017	1079	842	1019	830	864	720	915
chr11	572931	578658	iso_1341	1106	720	1217	1369	1017	1079	842	1019	830	864	720	915
chr11	573875	578658	iso_1342	954	636	1105	1168	918	814	517	823	704	584	470	757
chr11	613455	618666	iso_1344	379	382	313	490	398	445	1073	3309	1804	6920	957	1315
chr11	1039313	1050476	iso_1351	9	5	9	5	13	18	1600	1666	5597	12300	159	187
chr11	1157097	1160148	iso_1354	7	5	4	2	6	4	217	366	2536	5716	116	89
chr11	1174995	1178017	iso_1355	1001	639	746	868	412	389	609	400	1390	862	313	433
chr11	1396021	1397624	iso_1361	188	89	114	185	92	158	37	28	19	61	190	78
chr11	1958011	1958475	iso_1366	25	37	62	99	104	175	156	125	90	270	45	11
chr11	2589571	2598791	iso_1373	31	26	34	42	99	182	399	1478	1700	989	69	156
chr11	7841306	7841844	iso_1403	61	35	51	63	10	8	50	26	19	14	73	47
chr11	9338787	9343185	iso_1413	353	275	344	386	370	290	182	179	318	108	575	1746
chr11	9339896	9343185	iso_1414	334	265	313	344	358	278	174	170	307	104	494	1708
chr11	9467795	9472480	iso_1416	11	21	12	25	6	9	78	67	147	55	91	348
chr11	10366850	10374722	iso_1426	552	419	901	1096	802	660	1156	922	1340	461	791	2320
chr11	10366850	10375033	iso_1425	580	430	923	1132	818	678	1220	931	1375	485	832	2384
chr11	10375339	10382798	iso_8974	382	254	540	616	477	513	556	424	270	191	834	921
chr11	10631035	10639695	iso_1427	30	28	69	48	50	38	4489	2796	8727	4007	119	290
chr11	10642625	10646893	iso_1428	27	29	54	49	20	18	2399	1504	1518	557	44	175
chr11	10646031	10649544	iso_1429	10	14	12	21	5	6	573	473	124	55	7	51
chr11	13424027	13427028	iso_1438	163	107	177	202	158	169	414	233	407	139	244	599
chr11	14873423	14881972	iso_1445	476	348	775	1017	293	285	766	626	1777	1650	122	194
chr11	14875530	14881972	iso_1446	421	300	706	903	234	227	695	522	1505	1416	105	159
chr11	15197580	15199851	iso_1448	34	29	36	17	7	3	129	70	326	116	131	528
chr11	16092394	16095117	iso_1456	1041	670	729	874	667	644	550	403	375	175	749	1360
chr11	16092394	16095117	iso_1457	1041	670	729	874	667	644	550	403	375	175	749	1360
chr11	16092394	16095117	iso_1455	1041	670	729	874	667	644	550	403	375	175	749	1360
chr11	16092394	16095133	iso_1451	1041	670	729	874	667	644	550	403	375	175	750	1360
chr11	16092394	16095133	iso_1453	1041	670	729	874	667	644	550	403	375	175	750	1360
chr11	16092394	16095133	iso_1450	1041	670	729	874	667	644	550	403	375	175	750	1360
chr11	16092394	16095133	iso_1452	1041	670	729	874	667	644	550	403	375	175	750	1360
chr11	16092394	16095133	iso_1454	1041	670	729	874	667	644	550	403	375	175	750	1360
chr11	17057394	17064820	iso_1459	367	436	344	797	355	357	1026	866	1709	2078	528	597
chr11	17077519	17081596	iso_1460	2360	1638	2157	2071	9927	11570	2902	5115	2542	3563	7442	5662
chr11	17463924	17474251	iso_1464	1107	691	1129	858	224	133	1387	1837	4159	2942	154	397
chr11	17914790	17916376	iso_1470	30	16	28	45	90	87	221	194	17	52	46	34
chr11	17919324	17921848	iso_1471	31	25	26	42	101	90	180	230	22	53	52	27
chr11	17933008	17935861	iso_1472	23	25	137	132	27	19	134	122	48	63	1403	944
chr11	18200849	18206010	iso_9172	470	341	408	360	291	271	1090	1041	440	396	1781	1801
chr11	18297065	18299880	iso_1481	328	194	280	405	89	157	255	238	87	116	3760	2016
chr11	18308197	18309457	iso_1484	27	18	20	19	165	323	355	346	58	141	86	45
chr11	18308197	18309457	iso_1483	27	18	20	19	165	323	355	346	58	141	86	45
chr11	18378672	18380259	iso_1487	201	120	150	130	333	345	379	411	242	404	453	195
chr11	18378672	18380259	iso_1486	201	120	150	130	333	345	379	411	242	404	453	195
chr11	18520347	18522073	iso_1494	521	392	616	748	876	681	522	483	704	295	261	576
chr11	19148487	19149070	iso_1498	3	3	10	25	1	0	5	1	1	0	175	434
chr11	19149047	19149830	iso_1499	5	2	16	44	2	1	6	3	5	0	289	622
chr11	19150165	19150640	iso_1500	1	1	11	25	4	1	1	2	3	0	112	211
chr11	19166594	19173556	iso_1501	915	867	962	1443	828	693	2145	2078	1683	964	1138	2666
chr11	19166594	19173787	iso_1502	924	874	969	1450	829	698	2157	2086	1687	979	1168	2675
chr11	19310290	19316429	iso_1505	903	742	1016	1248	1025	1032	1030	922	1223	489	503	1430
chr12	79681	82020	iso_1514	278	225	267	302	155	114	589	349	183	102	438	645
chr12	538358	541086	iso_1516	81	69	59	45	24569	21836	419	343	474	292	20	95
chr12	538358	544325	iso_1518	89	72	62	54	25326	24277	428	356	488	325	31	106
chr12	538358	544325	iso_1519	89	72	62	54	25326	24277	428	356	488	325	31	106
chr12	538358	544325	iso_1517	89	72	62	54	25326	24277	428	356	488	325	31	106
chr12	663735	664734	iso_1522	346	176	203	278	424	665	296	325	142	331	158	109
chr12	663735	664734	iso_1521	346	176	203	278	424	665	296	325	142	331	158	109
chr12	744175	746434	iso_1524	469	343	435	433	748	823	2731	933	1099	1021	4506	6597
chr12	1729158	1734556	iso_1527	1831	1272	1407	1162	343	235	265	127	185	36	452	465
chr12	1729158	1739341	iso_1528	2266	1529	1697	1385	394	264	314	146	212	41	529	597
chr12	2279249	2280162	iso_1532	76	71	43	167	281	151	714	148	383	293	30	61
chr12	2483993	2484633	iso_1536	81	56	100	68	154	85	224	97	88	195	55	44
chr12	2484711	2485260	iso_1537	60	31	42	47	41	46	80	48	32	103	31	13
chr12	2486216	2487000	iso_1538	77	51	98	79	168	98	270	215	115	374	106	32
chr12	2795783	2800087	iso_1543	487	383	556	652	317	426	556	543	549	344	502	832
chr12	2795783	2800087	iso_1542	487	383	556	652	317	426	556	543	549	344	502	832
chr12	2838374	2840134	iso_1544	2067	1637	2163	2423	2135	1496	4338	3741	4259	1681	1036	3166
chr12	2940464	2944368	iso_1546	427	348	475	491	1015	1042	850	1014	3911	451	196	393
chr12	3146068	3149246	iso_8818	1973	1265	2117	2408	1037	1091	1481	1053	811	739	2555	1505
chr12	3159689	3161004	iso_1549	1350	1215	1360	1722	1239	1062	1320	1312	1064	607	1149	1844
chr12	3205442	3209628	iso_1551	401	259	356	384	497	980	3329	3172	5822	13008	88	77
chr12	3222234	3224571	iso_1553	84	93	45	128	90	99	2026	1434	86	283	324	168
chr12	3222234	3224571	iso_1552	84	93	45	128	90	99	2026	1434	86	283	324	168
chr12	3229748	3230327	iso_1554	0	0	0	0	87	246	2	2	0	1	34	14
chr12	3275160	3275503	iso_1555	2	0	9	7	2	3	3	1	0	1	34	15
chr12	4955080	4957229	iso_1568	100	88	171	196	62	101	39	84	22	19	49	77
chr12	5047598	5050604	iso_1572	2234	1673	2573	2671	4339	5556	4178	4671	5319	3545	1616	2898
chr12	6457112	6487576	iso_1583	2547	1786	4290	4511	497	651	34	44	3	1	460	518
chr12	6457112	6487576	iso_9116	2547	1786	4290	4511	497	651	34	44	3	1	460	518
chr12	8384389	8389989	iso_9093	247	203	349	420	194	99	192	213	159	59	1994	5991
chr12	8930906	8939704	iso_1606	1568	906	1449	1357	71	52	256	109	701	589	465	401
chr12	9035677	9036298	iso_1608	91	63	136	109	3	3	24	24	1	2	51	75
chr12	11253678	11256144	iso_9341	62	44	84	55	104	87	144	70	97	55	179	302
chr12	11253678	11258599	iso_8510	117	73	137	118	197	176	233	120	175	98	281	539
chr12	11341626	11344894	iso_1630	52	45	83	72	71	64	148	130	54	33	382	496
chr12	11463781	11465116	iso_1633	219	187	225	275	203	320	50	58	48	58	994	714
chr12	11470316	11472093	iso_8320	916	599	480	663	455	463	606	652	458	638	1044	390
chr12	11477881	11478496	iso_1634	33	24	15	26	72	165	279	174	174	551	296	69
chr12	11480542	11481101	iso_1635	165	65	137	152	52	86	136	85	65	158	200	62
chr12	11535105	11548238	iso_1636	577	373	589	855	403	669	958	486	108	326	839	272
chr12	11555208	11570595	iso_1637	1091	708	1161	1215	731	773	815	837	497	440	3368	3318
chr12	11575152	11578919	iso_1638	3383	1997	3052	3973	3462	7248	1132	1267	600	978	14133	7768
chr12	11625046	11626239	iso_1641	943	590	331	411	679	516	387	267	611	307	257	412
chr12	15329810	15332765	iso_1659	54	43	80	81	250	94	509	387	533	511	18	24
chr12	16254191	16269595	iso_1662	550	439	595	592	637	434	1611	841	2078	662	220	598
chr12	19408647	19414245	iso_1670	835	592	1023	1031	348	298	878	678	863	435	1653	3355
chr12	19460497	19462803	iso_1674	1430	1059	1272	1859	2724	2213	4440	4014	3535	1872	2320	3942
chr12	19719332	19721843	iso_1678	164	100	165	178	212	265	349	276	274	182	698	1195
chr12	19720452	19721843	iso_1679	150	91	142	153	201	254	331	260	253	178	688	1148
chr12	19720452	19721843	iso_1681	150	91	142	153	201	254	331	260	253	178	688	1148
chr12	19720452	19721843	iso_1680	150	91	142	153	201	254	331	260	253	178	688	1148
chr12	19722345	19723432	iso_1682	90	84	107	125	39	51	41	31	37	10	38	85
chr13	383346	383741	iso_1688	44	23	37	70	33	52	86	96	58	141	79	28
chr13	412768	413277	iso_1689	84	96	63	101	46	99	283	157	135	181	98	54
chr13	496477	502510	iso_1693	606	439	1039	1110	138	196	698	723	372	223	408	491
chr13	861249	877813	iso_1694	2002	1336	2917	3212	689	616	1349	1123	1034	531	365	604
chr13	1310163	1326260	iso_1702	325	250	351	419	3299	2368	771	783	341	619	135	107
chr13	1825085	1852885	iso_8740	4183	3577	5044	5883	2338	1765	2356	2122	2186	600	3033	8515
chr13	4105679	4109543	iso_1725	307	206	486	389	603	592	506	477	390	245	601	962
chr13	6059453	6064104	iso_9382	48	24	21	16	6	5	20	16	12	5	332	875
chr13	6059453	6072772	iso_8466	81	55	37	40	10	21	29	35	23	7	569	1672
chr13	7160357	7163566	iso_1733	23	14	10	7	22	8	13	20	6	3	1474	2946
chr13	7160357	7163566	iso_1732	23	14	10	7	22	8	13	20	6	3	1474	2946
chr13	7160357	7163566	iso_1731	23	14	10	7	22	8	13	20	6	3	1474	2946
chr13	7707921	7708294	iso_1744	0	1	10	11	2	10	9	11	35	0	3	5
chr13	9420880	9422696	iso_1757	318	164	247	316	260	245	503	296	251	306	876	840
chr13	9480902	9483749	iso_1762	1472	789	510	590	41	28	234	89	7	5	353	514
chr13	9489571	9491068	iso_1763	181	120	116	176	1035	1135	197	329	52	92	323	247
chr13	9494752	9495189	iso_1764	21	2	13	10	93	82	15	7	1	3	18	29
chr13	9496979	9497479	iso_1765	12	7	8	16	32	91	12	16	1	10	25	10
chr13	9515088	9516215	iso_1767	96	86	103	196	95	69	306	164	91	101	182	202
chr13	9529804	9531669	iso_1770	1063	616	749	936	516	454	4715	2408	1185	916	896	1154
chr13	9529871	9531669	iso_1769	1063	616	748	936	516	454	4713	2406	1185	916	895	1154
chr13	9651929	9652534	iso_1775	47	46	73	118	71	97	29	38	20	43	22603	13403
chr13	9752045	9758043	iso_1778	206	159	422	334	411	441	468	540	304	365	8051	7621
chr13	9758541	9762048	iso_1779	137	99	163	162	250	247	242	351	170	195	1449	1245
chr13	9764151	9770708	iso_1780	7186	4060	8193	7178	289	400	76	49	34	42	68	86
chr13	9878906	9885185	iso_1782	42	35	145	66	279	359	13	38	117895	137107	29	31
chr13	10774300	10776361	iso_1787	155	123	141	122	124	116	158	138	209	158	146	474
chr13	11601444	11602007	iso_1794	6	14	6	13	12	6	23	16	16	6	24	63
chr13	12350493	12362978	iso_1799	1107	830	1547	2028	4423	5842	1013	1105	2338	2083	814	882
chr13	12374723	12377406	iso_1801	1512	979	1630	1691	1493	1786	1708	1346	2163	2103	1623	1704
chr13	12375853	12377406	iso_1802	1181	762	1315	1315	1251	1530	1175	1111	1532	1847	1418	1111
chr13	12377411	12379489	iso_1803	1403	739	1147	1694	13964	17489	4031	4035	28307	43585	8412	3675
chr13	12385512	12397176	iso_1804	1726	1329	2004	1948	731	744	680	787	733	524	2691	2522
chr13	12392649	12397176	iso_1805	1172	937	1309	1313	535	542	440	584	526	388	1577	1596
chr13	12393589	12397176	iso_1806	1097	867	1170	1187	482	508	418	539	488	367	1472	1465
chr13	12434532	12442794	iso_1808	988	744	652	644	240	228	233	318	291	251	800	815
chr13	12459071	12463810	iso_1809	2398	2015	2316	2478	4240	3951	3850	7002	2804	3815	6678	3533
chr13	12459079	12461456	iso_9437	1849	1268	1866	1772	3710	3150	3386	5575	2454	3292	5659	3179
chr13	12459079	12463809	iso_8259	2398	2015	2315	2478	4240	3951	3850	7002	2804	3815	6678	3533
chr13	12459079	12463810	iso_9331	2398	2015	2316	2478	4240	3951	3850	7002	2804	3815	6678	3533
chr13	12459533	12463809	iso_8614	2385	2001	2306	2467	4233	3936	3829	6969	2792	3769	6566	3377
chr13	12470781	12472328	iso_1810	103	101	172	154	88	94	163	120	123	49	147	361
chr13	12778341	12781689	iso_8810	71	59	49	51	15	10	62	24	38	36	592	777
chr13	12778341	12781693	iso_1814	71	59	49	51	16	10	62	24	38	36	592	778
chr13	12778341	12781693	iso_9348	71	59	49	51	16	10	62	24	38	36	592	778
chr13	12782164	12786572	iso_1815	1330	1014	1011	1366	4378	5859	1829	2035	3395	3760	945	869
chr13	12782164	12786572	iso_8429	1330	1014	1011	1366	4378	5859	1829	2035	3395	3760	945	869
chr13	12857528	12861127	iso_1816	1745	1376	1482	1752	1128	1022	3550	2573	4209	1675	456	2380
chr13	12859908	12863723	iso_1819	1466	1096	1313	1356	779	658	2844	1695	3752	1281	439	1979
chr13	12896413	12897878	iso_1820	337	241	228	423	132	194	557	257	503	169	211	374
chr13	12896413	12912961	iso_1822	4585	3058	6504	6487	4870	4648	10734	8367	8220	5099	4827	7832
chr13	12896413	12912961	iso_1821	4585	3058	6504	6487	4870	4648	10734	8367	8220	5099	4827	7832
chr13	12896768	12912961	iso_8518	4542	3035	6493	6460	4868	4628	10680	8355	8197	5089	4784	7778
chr13	12896768	12912961	iso_9301	4542	3035	6493	6460	4868	4628	10680	8355	8197	5089	4784	7778
chr13	12896768	12912961	iso_1825	4542	3035	6493	6460	4868	4628	10680	8355	8197	5089	4784	7778
chr13	12896808	12897878	iso_1823	294	218	217	396	130	174	503	245	480	159	168	319
chr13	12904406	12912961	iso_1827	4109	2735	6074	5847	4628	4377	10010	8018	7589	4836	4375	7210
chr13	12904406	12912961	iso_1828	4109	2735	6074	5847	4628	4377	10010	8018	7589	4836	4375	7210
chr13	13157155	13161715	iso_1830	689	393	1138	1071	758	799	247	68	7	2	71	71
chr13	13738984	13749706	iso_1844	8	14	19	43	1684	5654	27	26	34	5	128	223
chr13	16212729	16218422	iso_1866	197	293	281	729	1155	1038	1015	1171	1012	772	67	103
chr13	16301650	16309902	iso_1868	517	508	2321	2558	36	24	64	72	28	27	439	537
chr13	16395931	16396541	iso_1872	618	438	514	559	2574	3463	991	984	984	1130	455	486
chr13	16540079	16543026	iso_1875	224	198	410	461	223	205	403	444	225	83	355	1090
chr13	16556289	16561318	iso_1878	96	70	91	105	164	162	541	681	181	85	107	259
chr13	16556289	16561318	iso_1877	96	70	91	105	164	162	541	681	181	85	107	259
chr13	16631645	16636700	iso_1881	90	78	83	116	164	168	522	629	148	100	136	274
chr14	881521	885575	iso_1919	231	157	242	300	202	142	536	432	333	91	99	468
chr14	2234324	2236023	iso_1938	261	236	215	294	223	316	262	297	200	248	541	517
chr14	2234324	2236023	iso_1937	261	236	215	294	223	316	262	297	200	248	541	517
chr14	2234324	2236029	iso_1936	261	236	215	294	223	316	262	297	200	248	541	517
chr14	2234497	2236023	iso_1941	257	232	211	286	222	310	261	295	200	246	533	513
chr14	2234497	2236023	iso_1940	257	232	211	286	222	310	261	295	200	246	533	513
chr14	2234497	2236029	iso_1939	257	232	211	286	222	310	261	295	200	246	533	513
chr14	3238737	3241482	iso_1952	2780	1723	2160	1443	284	311	570	675	222	193	443	676
chr14	4102244	4117791	iso_1959	2199	1173	2323	2306	749	707	1853	1329	900	760	1438	1898
chr14	4169092	4172939	iso_1962	18196	13489	21414	18936	16781	17672	21336	28848	39516	42142	9808	13208
chr14	4169092	4172939	iso_1960	18196	13489	21414	18936	16781	17672	21336	28848	39516	42142	9808	13208
chr14	4169092	4172939	iso_1961	18196	13489	21414	18936	16781	17672	21336	28848	39516	42142	9808	13208
chr14	4169092	4172939	iso_1963	18196	13489	21414	18936	16781	17672	21336	28848	39516	42142	9808	13208
chr14	4376041	4378416	iso_1969	414	252	436	442	619	505	693	588	792	336	446	712
chr14	4376256	4377780	iso_9452	259	175	278	294	384	306	505	332	560	186	233	493
chr14	4376256	4378416	iso_8957	413	252	434	438	617	500	693	588	790	332	379	709
chr14	4376256	4378416	iso_1970	413	252	434	438	617	500	693	588	790	332	379	709
chr14	4390850	4392423	iso_8755	1090	634	1022	1051	4786	6270	1768	1959	1462	2347	2805	1457
chr14	4390850	4392423	iso_1972	1090	634	1022	1051	4786	6270	1768	1959	1462	2347	2805	1457
chr14	4719675	4722613	iso_1979	123	88	154	147	309	354	262	320	155	231	1023	1113
chr14	4903657	4904630	iso_1982	506	227	236	236	150	89	430	292	555	1206	239	99
chr14	5058091	5060607	iso_1986	531	321	324	528	125	138	276	189	177	337	395	207
chr14	5096616	5102045	iso_1989	100	61	66	65	255	349	1414	1338	10707	12096	413	337
chr14	5951690	5961418	iso_1994	32	28	51	46	22	8	25	18	20	6	1038	3323
chr14	5951690	5961418	iso_1993	32	28	51	46	22	8	25	18	20	6	1038	3323
chr14	5982401	5985848	iso_9248	2100	1409	1747	1806	325	265	299	284	159	215	316	158
chr14	6033375	6039231	iso_1997	2246	2222	2468	2752	984	1399	6750	8966	2583	1826	747	793
chr14	6033375	6042027	iso_1998	2407	2338	2625	3011	1012	1423	7035	9143	2636	1876	777	853
chr14	6033375	6042269	iso_1999	2454	2360	2642	3086	1020	1443	7344	9238	2661	1912	805	861
chr14	6033375	6042269	iso_2000	2454	2360	2642	3086	1020	1443	7344	9238	2661	1912	805	861
chr14	6033375	6042370	iso_2001	2490	2372	2647	3098	1022	1448	7345	9238	2661	1914	809	862
chr14	6033375	6042592	iso_2002	2492	2373	2647	3099	1024	1450	7353	9239	2663	1915	812	863
chr14	6033900	6039231	iso_2003	1910	1739	2025	2301	739	986	5911	6628	2260	1270	514	712
chr14	6036300	6042592	iso_2004	1127	878	1107	1368	340	431	3452	3171	1192	692	319	442
chr14	6130718	6132497	iso_2006	1357	874	1387	1377	4969	5285	2911	2792	2612	2526	4128	6409
chr14	6132882	6135044	iso_8693	1699	1199	1583	1473	5158	4197	4824	6789	4056	4191	5184	5267
chr14	6135243	6135712	iso_2007	528	127	80	274	287	302	625	254	63	363	563	258
chr14	6551328	6553425	iso_2016	62	68	119	108	1	2	30	27	0	2	371	729
chr14	6853354	6858105	iso_2023	678	564	988	1051	855	539	338	474	863	503	387	716
chr14	6919065	6925804	iso_2025	220	165	316	320	119	66	311	204	201	115	681	830
chr14	7515722	7526644	iso_2036	632	489	1067	1190	381	291	386	376	348	91	510	1410
chr14	8470602	8473363	iso_9101	180	110	165	197	355	518	265	173	190	139	608	895
chr14	8523394	8526887	iso_2049	212	146	191	261	44	46	33	34	35	16	681	1192
chr14	8889995	8900828	iso_2059	549	461	1911	1879	878	1007	311	382	819	536	274	479
chr14	12093896	12095542	iso_8312	96	55	138	114	1443	1515	223	1018	295	400	79	34
chr14	12094569	12095542	iso_2071	96	55	138	114	1443	1515	223	1018	294	400	74	30
chr14	12097564	12098477	iso_2075	620	281	1007	509	7622	8294	1547	4890	2334	2258	198	195
chr14	12097564	12098477	iso_2074	620	281	1007	509	7622	8294	1547	4890	2334	2258	198	195
chr14	12097564	12098477	iso_2073	620	281	1007	509	7622	8294	1547	4890	2334	2258	198	195
chr14	12305502	12310453	iso_2080	318	208	357	365	3209	3219	7351	6568	3973	4473	627	426
chr14	12305502	12310453	iso_2081	318	208	357	365	3209	3219	7351	6568	3973	4473	627	426
chr14	12417501	12421215	iso_2084	3183	1936	3400	3205	2708	2861	985	1066	453	755	6244	3792
chr14	12422129	12424830	iso_2085	369	263	407	361	713	575	856	855	564	660	8096	8836
chr14	12694420	12694862	iso_2090	158	104	55	140	16	19	84	27	50	58	136	90
chr14	13003744	13009383	iso_2098	657	399	586	732	408	397	4255	4299	5173	4366	623	593
chr14	13887620	13892975	iso_2114	73	55	108	121	129	73	142	105	125	60	249	675
chr14	13887620	13893033	iso_2115	74	55	108	122	129	73	143	106	125	60	251	675
chr14	13893317	13900079	iso_2116	237	174	254	250	232	235	322	273	259	251	5675	5444
chr14	14411043	14416894	iso_2121	1576	1280	1463	1637	714	624	1512	1669	1424	573	772	1364
chr14	14967418	14977203	iso_2132	305	231	1327	1281	310	252	221	264	392	220	370	627
chr14	14967418	14977203	iso_2131	305	231	1327	1281	310	252	221	264	392	220	370	627
chr14	15050514	15054137	iso_2134	823	668	1110	1007	496	446	343	341	123	84	1820	2523
chr15	657489	663702	iso_2147	456	391	582	701	726	801	710	635	742	510	1900	2471
chr15	670451	676499	iso_2148	23	18	23	27	8	0	6	10	2	2	276	694
chr15	1293453	1300028	iso_2159	169	151	238	295	153	99	250	271	238	112	930	1665
chr15	2567691	2574755	iso_8254	724	527	949	923	524	441	429	559	346	242	2163	2557
chr15	3178996	3182245	iso_2176	1115	993	1046	1153	768	778	816	984	1306	641	4769	9517
chr15	3178996	3184184	iso_2177	1286	1124	1170	1333	847	867	961	1114	1543	739	5759	13229
chr15	3178996	3184184	iso_2178	1286	1124	1170	1333	847	867	961	1114	1543	739	5759	13229
chr15	3178996	3184211	iso_2180	1286	1124	1170	1333	847	867	961	1114	1543	739	5767	13230
chr15	3178996	3184211	iso_2182	1286	1124	1170	1333	847	867	961	1114	1543	739	5767	13230
chr15	3178996	3184211	iso_8335	1286	1124	1170	1333	847	867	961	1114	1543	739	5767	13230
chr15	3178996	3184211	iso_2181	1286	1124	1170	1333	847	867	961	1114	1543	739	5767	13230
chr15	3178996	3184211	iso_2179	1286	1124	1170	1333	847	867	961	1114	1543	739	5767	13230
chr15	4493239	4501935	iso_8391	125	86	137	117	122	68	207	182	187	58	1076	1203
chr15	4505440	4506947	iso_2189	5372	4439	4762	4814	5903	7264	7225	4957	7420	5146	35121	36107
chr15	4858074	4858927	iso_2194	4	5	2	1	0	0	14	10	0	0	107	172
chr15	4938018	4938644	iso_2197	83	56	44	85	41	61	88	87	70	92	215	253
chr15	5052093	5053519	iso_2201	234	119	189	170	303	309	307	235	263	106	196	389
chr15	5201892	5202776	iso_2209	93	63	66	79	14	28	82	48	41	30	82	87
chr15	5280966	5288991	iso_2215	268	216	386	367	192	155	242	263	229	109	709	1512
chr15	5297871	5308006	iso_9506	9180	6523	8295	8035	27122	33826	2355	3812	2536	2111	1419	2594
chr15	5297871	5315799	iso_9449	11655	8349	10195	10052	32162	41412	2849	4726	3142	2554	1794	3407
chr15	5432337	5438215	iso_2218	3876	2643	2156	2294	96	57	269	180	1436	1241	79	168
chr15	5433435	5437011	iso_2217	2142	1357	1357	1251	61	35	152	115	911	811	51	109
chr15	5594849	5597588	iso_2223	5	4	5	8	7	4	4	4	1	0	893	1415
chr15	5682532	5686326	iso_2226	66	51	133	73	68	156	698	2982	57234	52166	499	442
chr15	6028348	6032720	iso_9137	3	1	1	2	64200	67034	5	34	4	3	37	9
chr15	6028348	6032720	iso_8330	3	1	1	2	64200	67034	5	34	4	3	37	9
chr15	6028348	6032720	iso_2243	3	1	1	2	64200	67034	5	34	4	3	37	9
chr15	6028348	6032720	iso_2242	3	1	1	2	64200	67034	5	34	4	3	37	9
chr15	6028478	6032720	iso_2240	3	1	1	2	64200	67031	5	34	4	3	37	8
chr15	6028480	6032720	iso_2241	3	1	1	2	64200	67031	5	34	4	3	37	8
chr15	6030098	6032720	iso_2244	3	0	0	2	21491	21686	4	10	1	1	10	3
chr15	6112486	6113860	iso_2247	60	38	61	65	115	197	65	102	75	166	75	36
chr15	6202970	6209438	iso_2250	1448	777	1395	1097	2978	3400	14248	10878	22669	11534	1018	2208
chr15	6376463	6380154	iso_2260	3823	2242	3949	3845	5029	2971	6313	3641	4998	1316	1707	7415
chr15	6376463	6380368	iso_8338	3834	2252	3956	3856	5030	2977	6317	3644	4999	1319	1726	7425
chr15	6376463	6380368	iso_2259	3834	2252	3956	3856	5030	2977	6317	3644	4999	1319	1726	7425
chr15	6376463	6380461	iso_2261	3834	2252	3956	3856	5030	2977	6317	3644	4999	1319	1726	7426
chr15	6440783	6443572	iso_2262	1930	991	2699	2364	8	17	1	6	4	14	159	255
chr15	6728186	6739012	iso_2265	732	545	679	858	280	234	424	462	249	203	1393	2444
chr15	6957291	6961125	iso_2266	161	152	197	296	70	87	108	122	39	18	386	1137
chr15	7852057	7852758	iso_2280	72	60	105	162	64	55	88	55	56	110	149	57
chr15	7853377	7853715	iso_2282	30	25	48	67	14	18	21	33	22	48	57	20
chr15	8010320	8014811	iso_2293	375	291	348	302	175	133	514	1066	1441	2281	603	668
chr15	8010320	8014811	iso_2291	375	291	348	302	175	133	514	1066	1441	2281	603	668
chr15	8010320	8014811	iso_2289	375	291	348	302	175	133	514	1066	1441	2281	603	668
chr15	8010320	8014811	iso_2290	375	291	348	302	175	133	514	1066	1441	2281	603	668
chr15	8010320	8014811	iso_2292	375	291	348	302	175	133	514	1066	1441	2281	603	668
chr15	8126313	8131723	iso_2296	88	72	137	128	31	25	41	29	30	11	459	1022
chr15	8430798	8434310	iso_2303	912	667	1137	1217	861	805	1745	930	985	529	2825	5038
chr15	9256498	9257586	iso_2324	230	107	164	166	107	125	387	165	168	157	346	349
chr15	9256650	9256983	iso_2325	105	39	32	65	18	54	153	43	48	79	140	69
chr15	9276823	9278292	iso_2326	19	11	13	13	81	108	27	16	35	63	3294	2423
chr15	9278525	9281056	iso_2328	1120	946	507	636	453	485	593	836	2139	1705	3672	4442
chr15	9278525	9281065	iso_2327	1120	947	507	636	453	485	593	836	2139	1705	3676	4443
chr15	9278529	9281065	iso_2330	1120	947	507	636	453	485	593	836	2139	1705	3676	4443
chr15	9281219	9282269	iso_2332	47	43	29	53	39	71	41	33	32	29	155	131
chr15	9287999	9289688	iso_2334	830	559	270	272	138	122	189	182	657	580	1043	1336
chr15	9287999	9289688	iso_2333	830	559	270	272	138	122	189	182	657	580	1043	1336
chr15	9293916	9294935	iso_2335	158	106	114	174	153	168	357	270	244	171	224	515
chr15	9388346	9392810	iso_2336	66	46	45	40	87	81	111	92	153	91	921	1254
chr15	9388346	9392810	iso_2338	66	46	45	40	87	81	111	92	153	91	921	1254
chr15	9388346	9392810	iso_2337	66	46	45	40	87	81	111	92	153	91	921	1254
chr15	9426789	9431281	iso_2339	28	7	34	33	358	367	41	28	16	25	1074	1229
chr15	9437039	9439487	iso_2341	3616	2329	3184	3702	5781	5968	9640	10329	6965	8374	10099	7366
chr15	9437039	9440119	iso_2340	3616	2329	3184	3702	5781	5968	9640	10329	6965	8374	10099	7366
chr15	9890768	9894072	iso_2347	10067	7421	6194	6750	2149	2479	5013	4901	5566	6342	3805	3398
chr15	9890768	9894072	iso_2348	10067	7421	6194	6750	2149	2479	5013	4901	5566	6342	3805	3398
chr15	9900722	9901760	iso_2349	152	98	200	200	98	68	705	399	311	210	327	695
chr15	9960423	9965778	iso_2351	451	334	495	457	485	302	277	250	304	118	534	1154
chr15	9990953	9993020	iso_2352	499	318	913	1112	737	736	442	333	571	567	680	538
chr15	9994074	9998525	iso_2353	531	389	954	964	16	18	194	225	325	290	1344	960
chr15	10065571	10066781	iso_2356	154	111	97	124	8	9	14	11	6	3	72	64
chr15	10803863	10804482	iso_2357	30	17	14	27	12	77	73	62	46	206	96	9
chr15	11105187	11108230	iso_2366	498	303	228	309	70	115	1900	1207	2710	4407	278	260
chr15	11128533	11129157	iso_2367	129	49	77	73	14	19	158	52	94	41	90	164
chr15	11201030	11204675	iso_2369	1838	1285	1275	1506	906	1039	1884	1579	908	1086	2030	1326
chr15	12579833	12582434	iso_2379	1301	797	1616	1637	1400	1446	3093	3840	2469	5869	1397	573
chr16	87847	92756	iso_2387	2359	1466	2659	2806	1787	1999	3314	2970	2096	3067	3990	3216
chr16	91819	92642	iso_2388	895	542	1055	941	783	792	1065	1180	690	1133	1435	922
chr16	139241	143760	iso_2390	2470	1789	2438	3193	6378	6623	7758	8621	5861	6689	11251	7319
chr16	139241	143760	iso_2392	2470	1789	2438	3193	6378	6623	7758	8621	5861	6689	11251	7319
chr16	139241	143760	iso_2393	2470	1789	2438	3193	6378	6623	7758	8621	5861	6689	11251	7319
chr16	139241	143760	iso_2391	2470	1789	2438	3193	6378	6623	7758	8621	5861	6689	11251	7319
chr16	139241	143760	iso_2394	2470	1789	2438	3193	6378	6623	7758	8621	5861	6689	11251	7319
chr16	139264	142412	iso_2389	2263	1588	2206	2874	5835	5999	7231	7474	5309	6077	10257	6739
chr16	205617	207096	iso_2396	56	25	149	94	35	20	116	66	34	36	315	364
chr16	220795	221799	iso_2400	68	35	70	31	49	30	60	47	38	52	142	97
chr16	226846	229079	iso_2401	204	11	166	15	124	5	375	25	131	9	561	523
chr16	271266	273740	iso_2403	76	11	90	18	325	71	211	189	184	187	71	55
chr16	271494	273793	iso_2404	72	9	84	17	317	71	204	173	177	181	67	49
chr16	337325	340000	iso_2407	33	48	63	67	198	398	358	432	310	150	113	200
chr17	70376	120059	iso_2413	236	136	28	47	296	287	11	4	4	1	19827	22253
chr17	241005	243086	iso_2414	93	76	142	165	123	82	379	337	103	106	4557	2232
chr17	241005	243928	iso_2415	106	92	166	192	153	95	431	376	116	117	4804	2425
chr17	241005	244808	iso_8574	127	107	183	210	164	105	524	441	127	130	5276	2707
chr17	241005	244808	iso_2417	127	107	183	210	164	105	524	441	127	130	5276	2707
chr17	241005	244808	iso_8512	127	107	183	210	164	105	524	441	127	130	5276	2707
chr17	241005	244808	iso_2418	127	107	183	210	164	105	524	441	127	130	5276	2707
chr17	241005	244808	iso_2416	127	107	183	210	164	105	524	441	127	130	5276	2707
chr17	411602	413223	iso_2422	539	327	188	217	406	661	556	547	359	840	318	129
chr17	411602	413223	iso_2423	539	327	188	217	406	661	556	547	359	840	318	129
chr17	509030	511098	iso_2426	3980	3816	3566	6015	1263	3253	11423	5420	2577	2040	1067	224
chr17	513111	515981	iso_2427	59	47	35	33	52	78	2118	1796	3575	7684	944	368
chr17	550429	553620	iso_2431	2065	1395	1662	1904	1734	1563	4525	1816	4796	2208	1808	4590
chr17	550457	553620	iso_2430	2065	1395	1661	1904	1734	1563	4525	1816	4796	2207	1800	4587
chr17	565824	567456	iso_2432	713	456	661	884	194	228	339	193	236	242	381	548
chr17	1438495	1442709	iso_2445	230	206	150	183	146	121	485	349	363	150	396	1323
chr17	1555851	1558148	iso_9480	1079	652	664	926	1385	1814	3429	2498	2024	3334	4791	2630
chr17	1555851	1558331	iso_2452	1148	703	695	1018	1510	1895	3592	2704	2199	3391	4856	2771
chr17	1555851	1558331	iso_9215	1148	703	695	1018	1510	1895	3592	2704	2199	3391	4856	2771
chr17	1555851	1558331	iso_2454	1148	703	695	1018	1510	1895	3592	2704	2199	3391	4856	2771
chr17	1555851	1558331	iso_2455	1148	703	695	1018	1510	1895	3592	2704	2199	3391	4856	2771
chr17	1555851	1558331	iso_2450	1148	703	695	1018	1510	1895	3592	2704	2199	3391	4856	2771
chr17	1555851	1558331	iso_2451	1148	703	695	1018	1510	1895	3592	2704	2199	3391	4856	2771
chr17	1555851	1558331	iso_2453	1148	703	695	1018	1510	1895	3592	2704	2199	3391	4856	2771
chr17	1555851	1558331	iso_2456	1148	703	695	1018	1510	1895	3592	2704	2199	3391	4856	2771
chr17	1558994	1562112	iso_2457	81	48	132	100	101	109	165	115	104	68	3035	3029
chr17	1777737	1780102	iso_2461	100	77	76	94	66	63	886	612	172	194	207	415
chr17	1871839	1873934	iso_2464	16577	11050	11301	11352	3322	3874	4814	4943	4153	4765	251662	287145
chr17	1871839	1873940	iso_2465	16577	11050	11301	11352	3322	3874	4814	4943	4153	4765	251676	287161
chr17	1871842	1873934	iso_2462	16577	11050	11301	11352	3322	3874	4814	4943	4153	4765	251660	287142
chr17	1871842	1873940	iso_2463	16577	11050	11301	11352	3322	3874	4814	4943	4153	4765	251674	287158
chr17	2403669	2405919	iso_2471	199	125	10	40	2	2	1	1	0	0	18	7
chr17	2460149	2461738	iso_2473	118	64	210	220	25	22	5	4	0	0	48	33
chr17	4877425	4880460	iso_2485	677	423	296	387	1000	1206	30	23	44	7	1432	1772
chr17	4877425	4880801	iso_2486	883	559	356	519	1306	1694	38	28	53	10	1890	1988
chr17	4892835	4894094	iso_2487	114	79	54	120	63	82	151	118	489	800	375	177
chr17	4950470	4954571	iso_2489	629	486	752	746	641	451	959	689	758	274	688	2317
chr17	4992687	4994885	iso_2492	407	296	272	278	181	190	361	409	472	399	1536	1785
chr17	4992687	4994885	iso_2491	407	296	272	278	181	190	361	409	472	399	1536	1785
chr17	5083849	5101901	iso_8664	2043	1548	3231	3741	735	579	1293	919	751	457	1746	2989
chr17	5094964	5101901	iso_2497	1242	1028	2018	2467	581	480	1059	773	573	358	1461	2432
chr17	5139831	5185750	iso_2499	22644	15913	27140	29847	9570	7549	3232	3151	2446	868	3277	5888
chr17	5177999	5185750	iso_2500	6448	4645	8274	8679	4030	3271	1262	1364	866	413	1307	1777
chr17	5237448	5243022	iso_2502	75	62	158	127	649	322	166	162	164	86	317	493
chr17	5265767	5276546	iso_2504	423	382	560	638	575	601	2056	1953	395	283	816	1626
chr17	5284444	5293591	iso_2505	79	55	71	83	179	197	1102	857	745	497	60	84
chr17	5322940	5325886	iso_2508	29	22	16	22	33	31	874	808	41	60	18	11
chr17	5493562	5500564	iso_2510	743	522	942	838	1439	1854	1348	1663	3898	1701	502	859
chr17	5642983	5645854	iso_2518	481	296	378	391	402	513	532	577	431	640	3141	1775
chr17	5642983	5645854	iso_2519	481	296	378	391	402	513	532	577	431	640	3141	1775
chr17	5642983	5645927	iso_8708	481	296	379	391	402	513	532	577	431	640	3142	1775
chr17	5642983	5645927	iso_2516	481	296	379	391	402	513	532	577	431	640	3142	1775
chr17	5642983	5645927	iso_2517	481	296	379	391	402	513	532	577	431	640	3142	1775
chr17	5642983	5645927	iso_9044	481	296	379	391	402	513	532	577	431	640	3142	1775
chr17	5642983	5645927	iso_9039	481	296	379	391	402	513	532	577	431	640	3142	1775
chr17	5642983	5645927	iso_2515	481	296	379	391	402	513	532	577	431	640	3142	1775
chr17	5704676	5709566	iso_2521	261	199	256	344	279	225	432	235	360	104	292	888
chr17	5709732	5728572	iso_2522	2517	1799	2664	2922	730	586	1245	1219	934	501	2790	5027
chr17	5730982	5740319	iso_2523	1224	988	2423	2692	981	650	650	655	865	502	874	1672
chr17	5820610	5823772	iso_2525	67	40	111	66	64	55	137	107	88	23	213	417
chr17	5964157	5968644	iso_8337	364	211	371	257	164	82	308	197	372	182	486	680
chr17	6234781	6238330	iso_2534	715	453	576	591	507	534	1315	967	1393	911	1200	1228
chr17	6856071	6858812	iso_2543	161	128	156	185	189	86	237	90	230	65	426	2010
chr17	6859275	6865549	iso_2544	348	290	392	491	468	342	885	815	456	214	410	755
chr17	6865586	6867347	iso_9418	1536	738	1670	1687	2727	1529	2515	1903	1756	924	1433	1766
chr17	6865586	6867766	iso_9387	1727	858	1925	1916	3311	1936	3011	2496	2183	1256	1819	2137
chr17	6865586	6868183	iso_9439	2274	1149	2655	2434	4983	3297	4420	4140	3159	2400	3300	2918
chr17	6865586	6869273	iso_9455	2678	1427	3245	2873	6375	4414	5786	5687	4394	3223	4353	4070
chr17	6865586	6869273	iso_9402	2678	1427	3245	2873	6375	4414	5786	5687	4394	3223	4353	4070
chr17	6865586	6869289	iso_9502	2678	1427	3246	2873	6375	4414	5787	5687	4394	3224	4353	4070
chr17	6865586	6869289	iso_2545	2678	1427	3246	2873	6375	4414	5787	5687	4394	3224	4353	4070
chr17	6865586	6869289	iso_9440	2678	1427	3246	2873	6375	4414	5787	5687	4394	3224	4353	4070
chr17	6865586	6869289	iso_9410	2678	1427	3246	2873	6375	4414	5787	5687	4394	3224	4353	4070
chr17	6865586	6869289	iso_8264	2678	1427	3246	2873	6375	4414	5787	5687	4394	3224	4353	4070
chr17	6865586	6869289	iso_9153	2678	1427	3246	2873	6375	4414	5787	5687	4394	3224	4353	4070
chr17	6865586	6869289	iso_9318	2678	1427	3246	2873	6375	4414	5787	5687	4394	3224	4353	4070
chr17	6865586	6869289	iso_8760	2678	1427	3246	2873	6375	4414	5787	5687	4394	3224	4353	4070
chr17	6865586	6869289	iso_9087	2678	1427	3246	2873	6375	4414	5787	5687	4394	3224	4353	4070
chr17	6892293	6893653	iso_2547	12	14	21	30	4	3	15	10	16	7	96	201
chr17	7609600	7618530	iso_2556	6190	4617	3101	2704	86	70	5	10	0	9	18	14
chr17	7831248	7841489	iso_2559	606	300	637	671	1215	1101	1244	1413	284	390	853	472
chr17	7905239	7907873	iso_2563	256	221	267	295	134	100	129	184	124	66	182	403
chr17	7912318	7916188	iso_2566	438	377	418	604	78	83	101	158	95	84	171	181
chr17	8212679	8216536	iso_2571	1547	914	1365	1340	13	15	9	10	9	2	81	69
chr17	8600092	8609089	iso_2579	699	460	868	1095	394	546	444	484	287	244	1229	1403
chr17	8686229	8688118	iso_2581	137	95	207	195	4	5	329	403	28	37	72	45
chr17	8704335	8706569	iso_2582	725	412	462	497	1155	1527	766	451	592	596	2390	1779
chr17	8772501	8778261	iso_2590	1935	1389	4116	3895	572	614	1030	770	707	412	2174	5675
chr17	9517276	9518638	iso_2595	258	141	255	200	281	350	841	443	185	147	325	201
chr17	9518647	9519830	iso_2596	350	194	452	294	645	669	701	751	163	322	572	129
chr17	9591904	9595978	iso_2601	4157	3492	3532	5156	3934	4376	11872	12448	25647	23900	4374	10807
chr17	9591904	9595978	iso_2602	4157	3492	3532	5156	3934	4376	11872	12448	25647	23900	4374	10807
chr17	9595175	9595976	iso_2603	1165	699	698	1094	559	1094	3891	2824	5476	10549	2031	2127
chr18	15034	17961	iso_2614	282	207	402	433	321	233	587	535	629	233	81	187
chr18	3328743	3335074	iso_9040	332	412	488	701	105	101	347	365	409	185	313	744
chr18	3673515	3678450	iso_2638	53	53	57	101	537	215	1045	1028	264	386	42	103
chr18	3674461	3678431	iso_2639	49	47	53	97	492	189	989	964	248	297	30	95
chr18	4216767	4220932	iso_2645	1278	1021	1814	2607	936	811	2156	1802	1604	918	1296	2517
chr18	4555795	4559768	iso_2661	29	26	81	137	11	5	75	67	93	68	340	240
chr18	4579607	4588084	iso_2662	366	210	369	460	140	130	350	254	113	99	1281	2199
chr18	4614310	4621487	iso_2664	3010	2141	2511	2406	1056	883	2039	2014	1672	1096	818	1127
chr18	4680902	4682756	iso_2667	1824	1237	2377	2674	1471	1025	2660	1774	2593	1476	4309	5055
chr18	4680904	4682756	iso_2670	1824	1237	2377	2674	1471	1025	2660	1774	2593	1476	4309	5055
chr18	4680904	4682756	iso_2669	1824	1237	2377	2674	1471	1025	2660	1774	2593	1476	4309	5055
chr18	4680904	4682756	iso_2671	1824	1237	2377	2674	1471	1025	2660	1774	2593	1476	4309	5055
chr18	4681014	4682756	iso_2668	1824	1237	2377	2674	1471	1025	2660	1774	2593	1476	4279	5052
chr18	4782056	4787689	iso_2672	123	53	83	77	69	35	130	96	135	30	420	1315
chr18	4944907	4950165	iso_2673	274	226	289	335	155	230	183	252	172	104	2261	3651
chr18	4961759	4965094	iso_2674	780	577	618	621	207	268	1030	1308	1194	687	510	742
chr18	4962116	4965094	iso_2675	730	541	570	562	162	213	360	425	459	308	453	677
chr18	5038092	5040144	iso_2676	1990	1269	1362	1468	2974	2644	3364	3007	2740	2205	1707	1476
chr18	5038150	5040144	iso_2677	1990	1268	1362	1466	2974	2644	3364	3007	2740	2205	1706	1475
chr18	5068265	5068934	iso_2678	34	22	40	37	14	14	51	37	36	14	76	133
chr18	6700072	6705962	iso_8832	597	405	760	879	122	96	329	233	232	98	508	971
chr18	6712975	6718513	iso_2689	1319	879	2230	1899	1205	1241	1097	1657	864	1074	3436	3159
chr18	6762597	6763516	iso_2691	7	1	9	10	6	9	19	7	22	20	218	169
chr18	6859766	6863075	iso_2698	3830	3359	5311	6014	2948	2821	5398	6910	9714	5140	2051	3703
chr18	6859766	6865682	iso_8567	6287	5375	9105	9857	4441	4174	8781	10472	14834	7429	3641	7523
chr18	6859766	6867251	iso_2700	6566	5577	9410	10209	4557	4446	8958	10854	15043	7871	4071	7702
chr18	6859766	6867302	iso_2699	6572	5578	9410	10209	4557	4446	8958	10854	15043	7871	4074	7706
chr18	6955215	6960676	iso_2702	10	29	12	12	10	7	22	28	22	1	542	1930
chr18	8153016	8157233	iso_2713	98	119	12	15	114	83	547	603	2294	1777	143	19
chr18	9265791	9275169	iso_2714	828	716	1453	1481	642	508	1291	1111	1040	444	1014	1553
chr18	9295225	9301711	iso_2715	397	290	842	753	53	65	39	33	38	23	56	9
chr18	9469840	9473035	iso_2716	33088	23067	34144	30579	13837	15036	45416	39473	31696	67384	20548	13635
chr18	9469840	9473035	iso_2717	33088	23067	34144	30579	13837	15036	45416	39473	31696	67384	20548	13635
chr18	9470416	9473035	iso_2718	33088	23067	34144	30579	13837	15036	45416	39473	31696	67384	20548	13635
chr18	9470416	9473035	iso_8887	33088	23067	34144	30579	13837	15036	45416	39473	31696	67384	20548	13635
chr18	9480949	9482332	iso_2719	319	173	291	476	194	221	250	132	91	124	159	145
chr18	9570046	9572789	iso_2724	828	492	405	528	7	13	7	7	12	8	48	39
chr18	9828277	9830443	iso_2727	78	57	53	107	97	84	209	187	197	465	233	136
chr18	9830421	9832860	iso_2728	55	42	46	95	52	64	130	124	119	292	197	55
chr18	10020090	10023009	iso_2731	608	342	902	711	8	9	2	3	12	2	78	36
chr18	10036057	10038441	iso_2733	334	219	282	294	151	127	253	204	165	218	1237	1116
chr18	10053442	10055478	iso_2734	179	97	143	185	384	513	513	349	264	295	291	195
chr18	10139257	10141588	iso_2736	115	128	246	355	199	272	170	396	2342	2686	244	169
chr18	10139257	10141588	iso_2735	115	128	246	355	199	272	170	396	2342	2686	244	169
chr18	10156603	10165877	iso_2737	1558	957	1249	1367	860	903	1375	1055	1109	981	2780	2786
chr18	10169944	10174169	iso_2738	140	108	188	260	169	220	2211	2135	1019	2469	389	170
chr18	10188479	10190186	iso_2739	978	806	723	1132	719	927	1274	1005	502	358	5561	6731
chr18	10252184	10256649	iso_2742	210	198	346	352	29	65	42	87	29	41	415	382
chr18	10388706	10393166	iso_2744	464	394	773	1101	390	437	850	879	387	343	251	292
chr18	10393499	10401718	iso_2745	1494	1184	2760	3043	1374	921	1846	1106	1705	394	701	2993
chr18	10393499	10406871	iso_2746	1926	1477	3362	3900	1611	1247	2274	1489	2042	598	1097	3650
chr18	10393499	10406871	iso_9231	1926	1477	3362	3900	1611	1247	2274	1489	2042	598	1097	3650
chr18	10393499	10406871	iso_9210	1926	1477	3362	3900	1611	1247	2274	1489	2042	598	1097	3650
chr18	10393508	10401718	iso_2747	1494	1184	2760	3043	1374	921	1846	1106	1705	394	701	2993
chr18	10393581	10401718	iso_2748	1494	1184	2759	3043	1374	921	1846	1106	1704	394	700	2993
chr18	10396220	10406871	iso_2749	1292	956	2199	2705	978	853	1628	998	1335	407	758	2470
chr18	10591343	10596065	iso_2751	1673	1011	1083	1365	499	846	1684	1392	1703	1567	415	309
chr18	10604723	10608064	iso_2752	166	143	174	244	85	118	171	146	99	55	422	752
chr18	10604723	10608064	iso_2753	166	143	174	244	85	118	171	146	99	55	422	752
chr18	10611542	10613069	iso_2754	151	121	244	385	115	157	128	105	88	66	135	149
chr18	10650718	10655009	iso_2755	268	174	277	329	104	62	402	413	598	334	337	423
chr18	10721511	10724016	iso_2758	141	105	132	152	97	101	151	135	136	85	219	299
chr18	10898010	10900807	iso_2762	1127	689	748	1137	2344	3180	1714	1299	1628	2318	2893	2317
chr18	10898010	10900807	iso_2763	1127	689	748	1137	2344	3180	1714	1299	1628	2318	2893	2317
chr18	10898075	10900770	iso_2761	1127	689	748	1136	2344	3180	1714	1298	1628	2318	2893	2317
chr19	59298	63050	iso_2779	136	56	90	51	51	40	48	28	35	15	3726	2208
chr19	59298	64783	iso_2780	155	64	109	60	59	42	67	31	47	15	3947	3328
chr19	59298	64783	iso_2781	155	64	109	60	59	42	67	31	47	15	3947	3328
chr19	85686	87283	iso_2782	85	87	88	108	31	38	71	77	67	36	168	379
chr19	92082	92796	iso_8407	698	257	206	503	49	58	285	76	86	66	284	238
chr19	302067	309324	iso_2786	369	245	638	643	329	357	335	378	177	275	2526	1690
chr19	431393	437597	iso_2788	712	465	1025	919	50	31	94	48	65	14	139	372
chr19	501658	504540	iso_2790	526	443	550	791	357	377	575	657	426	386	732	718
chr19	595001	598812	iso_2791	518	393	464	471	187	178	607	725	420	310	206	352
chr19	704357	708767	iso_2792	128	83	118	144	217	116	841	607	598	405	372	495
chr19	3196431	3202573	iso_2809	529	508	784	820	370	287	781	846	873	594	339	653
chr19	3416605	3420726	iso_2815	150	115	191	198	149	137	274	254	385	221	347	657
chr19	3416605	3420726	iso_2816	150	115	191	198	149	137	274	254	385	221	347	657
chr19	3436875	3445244	iso_2818	253	220	363	373	334	274	687	702	623	379	3238	4611
chr19	3508505	3512084	iso_2819	144	135	83	99	36	13	208	114	92	44	806	1829
chr19	3751771	3766016	iso_2824	0	1	1	0	23406	26677	3	7	55	2	17	65
chr19	3751771	3773719	iso_9139	0	1	1	1	25045	27858	5	8	56	3	68	112
chr19	3751771	3773719	iso_2825	0	1	1	1	25045	27858	5	8	56	3	68	112
chr19	3751771	3782871	iso_2826	0	1	1	1	25110	27915	5	8	56	3	82	150
chr19	3751771	3783839	iso_2827	0	1	1	1	25137	27924	5	8	56	3	83	152
chr19	3752392	3766033	iso_2822	0	1	1	0	23395	26637	3	7	55	2	17	64
chr19	3752392	3773719	iso_2823	0	1	1	1	25033	27817	5	8	56	3	68	111
chr19	4344102	4345265	iso_2833	10	15	14	21	5	8	55	25	14	9	82	86
chr19	4462997	4472069	iso_2837	0	0	1	1	2803	2974	1	3	4	2	339	420
chr19	4848650	4851398	iso_2841	242	250	196	310	235	220	393	374	470	210	511	1289
chr19	4848655	4851398	iso_2840	242	250	196	310	235	220	392	374	470	210	511	1289
chr19	4896001	4901242	iso_2845	674	375	701	700	891	875	1952	1549	902	1110	730	526
chr19	4902066	4904215	iso_2846	2720	2120	1935	3226	6282	8638	7645	8087	5172	7674	3369	2331
chr19	4918875	4931587	iso_2848	689	483	788	915	308	255	859	759	1893	1406	765	1104
chr19	5331512	5335224	iso_2866	101	75	168	245	825	679	478	387	601	1005	77	53
chr19	5745521	5745960	iso_2870	2	1	69	73	3	3	13	11	1	0	839	566
chr19	5748814	5750898	iso_2871	26	19	363	517	7	14	93	147	4	4	223	51
chr19	5752549	5762952	iso_2872	1780	1044	2044	2075	709	823	1476	1502	1361	1403	16403	9634
chr19	5773427	5774330	iso_2873	104	58	132	120	58	24	178	54	171	15	55	520
chr19	5800652	5803141	iso_2874	1783	1081	2009	2270	3968	2834	4106	3292	3270	1672	2459	5941
chr19	5824918	5827315	iso_2875	221	115	156	193	62	51	484	446	139	258	271	193
chr19	5931566	5942202	iso_2878	1386	897	1241	1507	2278	2632	2814	1328	976	740	2154	3239
chr19	6062138	6063502	iso_2884	890	514	873	1155	190	255	344	186	73	128	482	181
chr19	6073897	6074495	iso_2885	98	73	60	88	15	15	7	15	7	6	57	1
chr19	6076480	6077375	iso_2886	107	77	78	121	18	39	17	6	3	5	42	18
chr19	6079377	6082587	iso_2887	224	140	75	87	1815	2836	24	8	53	54	183	72
chr19	6171903	6173999	iso_2891	20	25	43	50	14	17	16	6	17	4	581	1336
chr19	6182693	6185366	iso_2894	19	35	44	56	15	23	15	18	7	2	566	783
chr19	6323472	6329196	iso_2899	1267	738	1205	1045	50	58	129	150	77	66	255	131
chr19	6575564	6578610	iso_2906	241	147	273	238	239	168	788	604	271	215	128	132
chr19	6584616	6586428	iso_2914	27885	20950	25442	25822	31909	37599	33405	37793	42511	32610	43487	44135
chr19	6584616	6586430	iso_2910	27885	20950	25442	25822	31909	37599	33406	37793	42511	32610	43487	44135
chr19	6584616	6586433	iso_8632	27886	20951	25442	25824	31909	37599	33406	37793	42511	32610	43487	44135
chr19	6584616	6586433	iso_2915	27886	20951	25442	25824	31909	37599	33406	37793	42511	32610	43487	44135
chr19	6584616	6586435	iso_2912	27886	20951	25442	25824	31909	37599	33406	37793	42511	32610	43487	44135
chr19	6584616	6586437	iso_2913	27886	20951	25442	25825	31909	37599	33406	37794	42511	32610	43488	44137
chr19	6584616	6586438	iso_2908	27886	20951	25442	25825	31909	37599	33406	37794	42511	32610	43488	44137
chr19	6584616	6586438	iso_2909	27886	20951	25442	25825	31909	37599	33406	37794	42511	32610	43488	44137
chr19	6584616	6586438	iso_2916	27886	20951	25442	25825	31909	37599	33406	37794	42511	32610	43488	44137
chr19	6584616	6586439	iso_2911	27886	20951	25442	25825	31909	37599	33406	37794	42511	32610	43488	44137
chr19	6584626	6586435	iso_2917	27885	20951	25441	25824	31909	37598	33406	37792	42511	32610	43486	44134
chr19	6584626	6586437	iso_2918	27885	20951	25441	25825	31909	37598	33406	37793	42511	32610	43487	44136
chr19	6640428	6644018	iso_2919	192	154	224	254	2712	2915	535	504	241	152	487	1595
chr19	6656539	6658359	iso_2923	38	61	34	97	69	65	144	185	154	49	78	147
chr19	6775233	6776413	iso_2924	13	8	2	8	2	2	7	6	4	7	265	346
chr19	6865586	6868276	iso_2927	2	7	5	5	11	17	267	483	30	51	47	30
chr19	7067895	7070598	iso_2931	7	12	4	15	43	23	5	8	7	2	262	1361
chr19	7188275	7195831	iso_2933	431	370	625	706	380	357	422	516	195	115	1414	1867
chr19	7285411	7308080	iso_2935	8444	6549	9380	9261	2414	2323	3980	5132	2909	1775	2814	4551
chr19	8706790	8710488	iso_2952	1892	1683	2767	3712	2266	2189	3186	2831	2693	1235	3009	6272
chr19	9094339	9099034	iso_2956	1377	1046	2166	2384	1453	1055	1438	1103	2694	1460	438	752
chr19	9094339	9101849	iso_2961	2449	1724	3956	4277	2851	2126	2595	2144	5268	2623	751	1539
chr19	9094339	9101849	iso_2957	2449	1724	3956	4277	2851	2126	2595	2144	5268	2623	751	1539
chr19	9094339	9101849	iso_2959	2449	1724	3956	4277	2851	2126	2595	2144	5268	2623	751	1539
chr19	9094339	9101849	iso_2960	2449	1724	3956	4277	2851	2126	2595	2144	5268	2623	751	1539
chr19	9094339	9101849	iso_2958	2449	1724	3956	4277	2851	2126	2595	2144	5268	2623	751	1539
chr19	9096613	9101849	iso_2962	1851	1247	3180	3265	2346	1657	1952	1685	4046	1949	496	1193
chr19	9299511	9301791	iso_2963	148	131	209	251	142	104	452	397	501	365	459	410
chr19	9562080	9565470	iso_2968	557	393	181	196	31	28	100	80	21	20	76	93
chr19	9568007	9568650	iso_2969	15	8	17	16	49	28	64	58	45	88	61	25
chr19	9800951	9803932	iso_2972	392	276	331	405	283	305	1086	924	536	569	404	630
chr19	9882169	9890796	iso_2979	220	174	62	75	124	70	11	10	17	0	497	1335
chr19	9882169	9890864	iso_2978	227	178	62	78	125	73	11	10	17	0	509	1336
chr19	9882255	9889514	iso_2977	184	158	57	65	120	62	9	9	17	0	466	1262
chr19	9890868	9896026	iso_2980	362	298	101	87	189	101	14	24	14	4	1234	2612
chr2	275594	280533	iso_2988	780	376	477	645	579	904	881	717	441	686	2750	1382
chr2	306172	307894	iso_2990	293	177	344	396	188	347	713	664	317	671	323	108
chr2	398659	400461	iso_2993	671	406	897	1099	654	713	10574	9229	38135	56352	306	342
chr2	2295674	2300126	iso_3015	442	284	340	336	287	299	448	594	402	349	830	1738
chr2	2348617	2351041	iso_3019	101	54	75	92	85	164	218	128	73	225	3345	1152
chr2	2348618	2351041	iso_3020	101	54	75	92	85	164	218	128	73	225	3345	1152
chr2	3418037	3454917	iso_3033	3	3	4	3	46731	54299	26	45	41	9	34	45
chr2	3418037	3454917	iso_8684	3	3	4	3	46731	54299	26	45	41	9	34	45
chr2	3418037	3454917	iso_8432	3	3	4	3	46731	54299	26	45	41	9	34	45
chr2	3418037	3454917	iso_3031	3	3	4	3	46731	54299	26	45	41	9	34	45
chr2	3418037	3454917	iso_3037	3	3	4	3	46731	54299	26	45	41	9	34	45
chr2	3418037	3454917	iso_3030	3	3	4	3	46731	54299	26	45	41	9	34	45
chr2	3418037	3454917	iso_8721	3	3	4	3	46731	54299	26	45	41	9	34	45
chr2	3418037	3454917	iso_3035	3	3	4	3	46731	54299	26	45	41	9	34	45
chr2	3418037	3454917	iso_3036	3	3	4	3	46731	54299	26	45	41	9	34	45
chr2	3418037	3454917	iso_3028	3	3	4	3	46731	54299	26	45	41	9	34	45
chr2	3418037	3454917	iso_8936	3	3	4	3	46731	54299	26	45	41	9	34	45
chr2	3418037	3454917	iso_8480	3	3	4	3	46731	54299	26	45	41	9	34	45
chr2	3418037	3454917	iso_3034	3	3	4	3	46731	54299	26	45	41	9	34	45
chr2	3418037	3454917	iso_3032	3	3	4	3	46731	54299	26	45	41	9	34	45
chr2	3418037	3454917	iso_8883	3	3	4	3	46731	54299	26	45	41	9	34	45
chr2	3418037	3454917	iso_3029	3	3	4	3	46731	54299	26	45	41	9	34	45
chr2	3418037	3454917	iso_8620	3	3	4	3	46731	54299	26	45	41	9	34	45
chr2	3418037	3454917	iso_8427	3	3	4	3	46731	54299	26	45	41	9	34	45
chr2	3418037	3454917	iso_3027	3	3	4	3	46731	54299	26	45	41	9	34	45
chr2	3418037	3454917	iso_8991	3	3	4	3	46731	54299	26	45	41	9	34	45
chr2	3418037	3455260	iso_3038	3	3	4	3	46735	54302	26	45	41	9	35	46
chr2	3418037	3455260	iso_9074	3	3	4	3	46735	54302	26	45	41	9	35	46
chr2	3419179	3454917	iso_8377	3	3	4	3	46625	54173	26	45	41	9	34	45
chr2	3419179	3454917	iso_8269	3	3	4	3	46625	54173	26	45	41	9	34	45
chr2	3419179	3454917	iso_8804	3	3	4	3	46625	54173	26	45	41	9	34	45
chr2	3419179	3454917	iso_8488	3	3	4	3	46625	54173	26	45	41	9	34	45
chr2	3419179	3454917	iso_8770	3	3	4	3	46625	54173	26	45	41	9	34	45
chr2	3419179	3454917	iso_9219	3	3	4	3	46625	54173	26	45	41	9	34	45
chr2	3419179	3454917	iso_9176	3	3	4	3	46625	54173	26	45	41	9	34	45
chr2	3419179	3454917	iso_3048	3	3	4	3	46625	54173	26	45	41	9	34	45
chr2	3419179	3454917	iso_8547	3	3	4	3	46625	54173	26	45	41	9	34	45
chr2	3419179	3454917	iso_8651	3	3	4	3	46625	54173	26	45	41	9	34	45
chr2	3419179	3454917	iso_3049	3	3	4	3	46625	54173	26	45	41	9	34	45
chr2	3419179	3454917	iso_9104	3	3	4	3	46625	54173	26	45	41	9	34	45
chr2	3419179	3454917	iso_3047	3	3	4	3	46625	54173	26	45	41	9	34	45
chr2	3419179	3454917	iso_8666	3	3	4	3	46625	54173	26	45	41	9	34	45
chr2	3419179	3454917	iso_3050	3	3	4	3	46625	54173	26	45	41	9	34	45
chr2	3419179	3454917	iso_8360	3	3	4	3	46625	54173	26	45	41	9	34	45
chr2	3420095	3428352	iso_9460	0	0	2	0	37536	46579	9	31	27	2	16	15
chr2	3420095	3428352	iso_9389	0	0	2	0	37536	46579	9	31	27	2	16	15
chr2	3420095	3454917	iso_8815	3	3	4	3	46520	54095	26	45	41	9	32	44
chr2	3420095	3454917	iso_9141	3	3	4	3	46520	54095	26	45	41	9	32	44
chr2	3420095	3454917	iso_3045	3	3	4	3	46520	54095	26	45	41	9	32	44
chr2	3420095	3454917	iso_8436	3	3	4	3	46520	54095	26	45	41	9	32	44
chr2	3420095	3454917	iso_3043	3	3	4	3	46520	54095	26	45	41	9	32	44
chr2	3420095	3454917	iso_9010	3	3	4	3	46520	54095	26	45	41	9	32	44
chr2	3420095	3454917	iso_3046	3	3	4	3	46520	54095	26	45	41	9	32	44
chr2	3420095	3454917	iso_3044	3	3	4	3	46520	54095	26	45	41	9	32	44
chr2	3420095	3454917	iso_8697	3	3	4	3	46520	54095	26	45	41	9	32	44
chr2	3420146	3428352	iso_3041	0	0	2	0	37529	46575	9	31	27	2	16	15
chr2	3420146	3428352	iso_3039	0	0	2	0	37529	46575	9	31	27	2	16	15
chr2	3420146	3428352	iso_3040	0	0	2	0	37529	46575	9	31	27	2	16	15
chr2	3420146	3454917	iso_3042	3	3	4	3	46513	54091	26	45	41	9	32	44
chr2	3989013	3998405	iso_8853	666	468	607	735	945	1265	887	988	923	931	2826	2572
chr2	3992277	3994813	iso_3053	202	121	208	239	293	356	198	279	224	239	844	647
chr2	5224694	5235496	iso_3055	332	264	177	242	77	195	177	207	357	163	1972	2439
chr2	5256963	5263756	iso_3056	340	252	204	257	126	135	273	232	1655	701	153	388
chr2	6555117	6561208	iso_3063	635	396	961	967	461	364	423	682	430	196	365	489
chr2	10368350	10373375	iso_3074	747	416	524	591	82	102	94	62	724	1822	1970	2899
chr2	15232357	15236529	iso_3092	144	95	203	258	77	62	1136	1233	1708	1707	103	144
chr2	15232357	15236529	iso_3093	144	95	203	258	77	62	1136	1233	1708	1707	103	144
chr2	15314651	15316382	iso_3095	45	34	31	46	26	23	66	57	50	24	196	532
chr2	16606312	16612682	iso_3106	423	257	343	325	113	69	182	89	479	91	297	840
chr2	16606670	16613287	iso_3107	404	257	331	326	111	62	209	92	488	106	404	921
chr2	22631225	22638752	iso_3151	10	15	7	8	0	1	32	17	2	3	461	1094
chr2	22810349	22815247	iso_3153	590	472	543	576	262	218	243	235	314	102	407	1668
chr2	23979980	23988166	iso_3157	593	475	164	168	215	340	786	971	7176	6570	715	818
chr2	31413545	31437360	iso_9031	2946	2118	5594	7081	2331	1824	4941	3253	3036	1346	2530	6150
chr2	31413545	31437360	iso_9006	2946	2118	5594	7081	2331	1824	4941	3253	3036	1346	2530	6150
chr2	31450930	31455411	iso_3183	459	293	2656	2376	314	276	329	366	327	122	129	379
chr2	31895188	31897831	iso_3189	901	686	793	1004	2860	4300	768	791	1459	582	438	737
chr2	31895188	31897879	iso_3187	901	687	793	1004	2860	4300	768	791	1459	582	446	740
chr2	31895188	31898040	iso_3188	902	687	793	1005	2860	4301	770	791	1459	582	465	750
chr2	31895188	31898170	iso_3190	902	687	793	1005	2860	4301	770	791	1459	582	483	756
chr2	32254522	32255961	iso_3191	10	4	5	3	2	0	3	5	8	8	6676	7690
chr2	32315310	32319242	iso_3193	1920	1531	1992	2909	1685	1753	3654	2351	2100	879	1911	8254
chr2	32315374	32327334	iso_3194	4342	3216	4514	6206	3758	3782	7814	5212	4099	2186	4681	16108
chr2	40806701	40807660	iso_3237	3	6	5	7	4	8	10	16	16	9	316	346
chr2	41057702	41058627	iso_3239	149	74	68	95	56	85	146	39	51	78	51	46
chr2	41761320	41764932	iso_8891	1164	774	1071	1514	1616	1386	2201	2365	2212	1460	2129	2969
chr2	41761320	41764932	iso_3242	1164	774	1071	1514	1616	1386	2201	2365	2212	1460	2129	2969
chr2	41761653	41764932	iso_3243	1164	773	1071	1512	1615	1384	2201	2364	2210	1460	2127	2968
chr2	41761653	41764932	iso_8387	1164	773	1071	1512	1615	1384	2201	2364	2210	1460	2127	2968
chr2	41761655	41764805	iso_9299	1164	773	1071	1512	1615	1384	2201	2363	2210	1460	2094	2967
chr2	41761655	41764932	iso_8716	1164	773	1071	1512	1615	1384	2201	2364	2210	1460	2127	2968
chr2	43219321	43222562	iso_3253	246	155	178	210	212	210	456	623	645	267	1077	2957
chr2	44556043	44561146	iso_3267	1385	1076	1212	1329	522	582	400	490	547	215	890	1943
chr2	44935744	44940454	iso_8450	3747	2032	3717	3585	9560	7009	10833	11862	6591	6626	17107	9835
chr2	44935744	44940454	iso_3279	3747	2032	3717	3585	9560	7009	10833	11862	6591	6626	17107	9835
chr2	44935744	44940464	iso_3278	3747	2032	3717	3585	9560	7009	10833	11862	6591	6626	17107	9835
chr2	44935744	44940464	iso_8918	3747	2032	3717	3585	9560	7009	10833	11862	6591	6626	17107	9835
chr2	44935744	44940493	iso_3275	3747	2032	3717	3585	9560	7009	10833	11862	6591	6626	17109	9835
chr2	44935744	44940493	iso_3276	3747	2032	3717	3585	9560	7009	10833	11862	6591	6626	17109	9835
chr2	44935744	44940493	iso_8808	3747	2032	3717	3585	9560	7009	10833	11862	6591	6626	17109	9835
chr2	44935744	44940493	iso_3277	3747	2032	3717	3585	9560	7009	10833	11862	6591	6626	17109	9835
chr2	62007565	62013943	iso_3349	61	48	86	102	2725	1104	22	41	44	6	82	106
chr2	62316656	62322062	iso_3358	4537	2996	1215	1364	43	43	100	111	81	74	107	194
chr2	63335357	63339117	iso_3360	777	467	416	428	2070	2416	744	680	2324	1132	843	1158
chr2	75710660	75716166	iso_3388	351	235	259	285	147	138	292	199	266	88	752	2870
chr2	79901278	79902005	iso_3407	7	2	1	5	8	2	143	73	0	0	11	28
chr2	84305538	84313741	iso_3413	1458	1154	3785	4200	286	331	225	171	114	37	398	952
chr2	84340869	84352573	iso_3414	854	710	1846	2009	755	852	28	14	16	1	47	62
chr2	85620006	85626673	iso_3420	161	108	1030	1015	226	227	31	42	40	22	84	151
chr2	88555654	88560130	iso_3428	380	303	355	471	155	122	1405	1449	109	64	656	1349
chr2	88555654	88560130	iso_3429	380	303	355	471	155	122	1405	1449	109	64	656	1349
chr2	96439581	96443972	iso_3452	19	32	24	31	24	10	71	108	755	184	11	16
chr2	97956448	97957267	iso_3473	23	26	25	48	282	480	56	267	80	81	7	5
chr2	98629376	98637300	iso_3482	624	461	1665	1613	609	512	58	94	32	31	120	261
chr2	100091210	100093189	iso_3491	177	134	65	95	181	163	5	1	0	0	2	4
chr2	100645688	100650674	iso_3497	6	9	1	1	7492	6747	5	11	2	1	5	48
chr2	114674215	114711288	iso_3564	8	7	0	0	14397	14258	0	5	8	6	245	341
chr2	114786928	114791299	iso_3565	37	19	33	29	316	391	1199	1032	994	590	57	135
chr2	117735044	117739747	iso_3581	254	159	217	242	339	308	248	158	207	108	460	828
chr2	117735452	117739747	iso_3582	253	158	215	239	336	303	245	157	205	107	334	721
chr2	125683101	125690719	iso_3608	1043	694	590	817	642	637	165	287	174	79	364	867
chr2	127591341	127592724	iso_3621	0	1	0	2	67	60	219	258	0	1	75	77
chr2	128374269	128378917	iso_8656	2064	1251	2900	2239	6405	4620	4669	6435	4124	3859	17709	17366
chr2	128503015	128509847	iso_3631	1979	1451	1591	1694	1584	1577	2868	3054	1656	660	672	1612
chr2	128503015	128509847	iso_3632	1979	1451	1591	1694	1584	1577	2868	3054	1656	660	672	1612
chr2	128503015	128509847	iso_8833	1979	1451	1591	1694	1584	1577	2868	3054	1656	660	672	1612
chr2	129022852	129024981	iso_3635	77	64	316	376	90	35	57	82	135	41	62	237
chr2	129189006	129191109	iso_3638	17	14	13	34	27	27	8	10	0	1	152	227
chr2	143302806	143309618	iso_3680	2	3	7	16	10	20	51	91	6	9	389	514
chr2	145289454	145290657	iso_8926	2290	1420	1796	3008	3668	5151	3556	4978	3718	6941	7248	3612
chr2	148432662	148442199	iso_3689	87	71	103	86	74	51	272	254	297	180	1667	1845
chr2	148444535	148450049	iso_3690	307	208	575	622	392	388	1169	997	2812	2815	544	412
chr20	1289825	1294957	iso_3734	57	40	127	106	49	24	84	36	34	14	205	884
chr20	1289825	1294957	iso_3733	57	40	127	106	49	24	84	36	34	14	205	884
chr20	1591132	1598589	iso_3742	627	542	697	757	464	374	1321	2061	905	412	1281	1695
chr20	1759416	1763246	iso_3748	540	485	561	892	225	238	494	427	309	205	435	912
chr20	2961946	2963781	iso_3758	0	0	0	0	1086	989	1	0	2	0	8	14
chr20	2966572	2969268	iso_3759	0	0	0	1	1016	865	1	0	4	0	15	34
chr20	4159588	4165854	iso_3761	24	14	16	45	6	9	11	25	14	6	805	1274
chr20	4167661	4169080	iso_3762	53	37	20	42	23	19	44	41	44	27	317	962
chr20	5569751	5573541	iso_3768	95	118	89	119	74	76	108	149	102	75	337	501
chr20	5837956	5845131	iso_3776	277	272	373	400	410	318	273	327	287	166	2669	4528
chr20	5837969	5845131	iso_3775	277	272	373	400	410	318	273	327	287	166	2663	4524
chr20	7217989	7224903	iso_8640	1565	941	1120	1315	283	201	307	271	501	145	55	155
chr20	8107189	8110046	iso_3792	69	48	46	47	101	44	54	63	69	29	214	475
chr20	8171775	8178749	iso_8765	809	605	880	1003	929	835	927	957	1330	809	1612	2607
chr20	8171775	8178749	iso_9138	809	605	880	1003	929	835	927	957	1330	809	1612	2607
chr20	8719702	8726411	iso_3799	120	89	91	107	15	7	101	29	17	11	2942	7007
chr20	8779369	8785044	iso_3803	350	256	544	622	154	148	234	184	221	72	230	847
chr20	8779369	8785044	iso_3802	350	256	544	622	154	148	234	184	221	72	230	847
chr20	8779369	8785044	iso_3804	350	256	544	622	154	148	234	184	221	72	230	847
chr20	8779403	8785044	iso_3805	350	256	544	622	154	148	234	184	221	72	228	846
chr20	9843426	9851739	iso_3815	718	443	894	882	1047	901	1291	935	679	639	389	336
chr20	9883853	9900013	iso_3818	1658	1347	1906	2239	1496	1635	1330	1138	913	606	3900	6745
chr20	9883853	9900013	iso_3816	1658	1347	1906	2239	1496	1635	1330	1138	913	606	3900	6745
chr20	9883853	9900013	iso_3817	1658	1347	1906	2239	1496	1635	1330	1138	913	606	3900	6745
chr20	9883853	9900013	iso_8830	1658	1347	1906	2239	1496	1635	1330	1138	913	606	3900	6745
chr20	9886941	9891826	iso_3819	274	234	429	508	322	327	202	171	175	85	292	756
chr20	10134717	10136622	iso_3824	936	677	559	616	156	190	127	92	151	227	154	137
chr20	10136302	10137491	iso_3825	612	373	364	349	102	99	77	54	77	116	216	158
chr20	10323507	10327208	iso_3826	197	133	75	105	18	24	27	10	0	1	1367	1728
chr20	10378627	10392165	iso_8443	54	37	39	42	35	13	79	76	67	35	2944	7597
chr20	10385633	10392165	iso_3830	45	31	31	32	28	9	58	54	52	26	2065	5067
chr20	10701899	10702200	iso_3838	32	20	24	41	9	6	11	7	1	8	4	2
chr20	10905210	10909060	iso_3843	707	379	1077	1132	360	392	696	682	412	396	384	433
chr20	11071356	11075146	iso_3845	324	268	275	453	177	158	452	536	956	829	245	507
chr20	11217488	11222598	iso_3849	568	452	609	678	343	377	432	650	290	271	657	1040
chr20	11230698	11231968	iso_9150	1124	669	792	881	3603	6015	2299	2341	1514	2321	2816	2315
chr20	11988384	11990003	iso_3860	98	46	110	63	91	127	83	119	50	75	946	532
chr20	12679412	12681253	iso_3866	173	160	224	248	180	99	118	60	103	17	310	1095
chr20	12679412	12681253	iso_3867	173	160	224	248	180	99	118	60	103	17	310	1095
chr20	14142080	14147210	iso_3881	393	306	406	506	322	327	601	591	765	319	2204	2309
chr20	14142080	14147211	iso_3880	393	306	406	506	322	327	601	591	765	319	2204	2309
chr20	14142080	14147211	iso_3878	393	306	406	506	322	327	601	591	765	319	2204	2309
chr20	14142080	14147211	iso_3879	393	306	406	506	322	327	601	591	765	319	2204	2309
chr21	106852	107432	iso_3889	139	78	81	69	38	24	66	42	50	41	45	23
chr21	315809	335789	iso_8997	4511	2870	5685	6495	205	244	329	317	51	31	757	1389
chr21	582805	586549	iso_3900	635	509	984	889	961	980	1110	1362	846	1197	1913	1683
chr21	594998	597664	iso_3901	104	64	132	177	306	269	70	72	5	20	70	35
chr21	628226	629309	iso_3902	147	92	16	57	17	19	25	54	7	7	47	21
chr21	633947	636464	iso_3903	108	69	48	63	1577	1716	47	47	30	64	99	50
chr21	633947	638536	iso_3904	181	106	90	109	1953	2285	86	82	49	102	193	75
chr21	668883	669882	iso_8900	814	513	510	608	150	182	97	99	48	97	370	222
chr21	914040	919354	iso_3906	318	271	615	709	319	265	424	387	387	163	331	732
chr21	915360	920255	iso_3907	277	226	522	597	266	247	322	343	330	156	278	644
chr21	920804	933526	iso_3908	562	433	464	461	111	57	262	171	98	28	3427	7652
chr21	920824	930447	iso_3909	393	285	330	324	73	38	180	136	72	14	3016	6845
chr21	935014	939407	iso_3910	646	581	750	868	407	321	830	728	716	470	915	1292
chr21	937685	942154	iso_3911	384	368	457	524	253	202	442	495	433	260	1721	4670
chr21	1240274	1244025	iso_3914	276	223	8	23	519	438	1609	781	5	0	11	15
chr21	1907482	1912242	iso_3922	229	164	1091	922	984	1091	35	51	48	34	147	214
chr21	1958825	1963515	iso_3925	4015	3378	3172	3542	995	670	1421	1563	1413	548	814	1838
chr21	1958825	1963515	iso_3926	4015	3378	3172	3542	995	670	1421	1563	1413	548	814	1838
chr21	2216464	2218171	iso_3933	146	119	257	323	108	92	146	127	165	60	72	158
chr21	2217998	2220350	iso_3934	263	258	539	687	292	273	471	404	554	209	117	432
chr21	2236364	2238935	iso_9306	156	123	176	213	277	223	387	225	271	121	188	611
chr21	2236364	2238950	iso_8914	156	123	176	214	277	223	387	225	271	121	188	611
chr21	2236367	2238950	iso_3937	156	123	176	214	277	223	387	225	271	121	188	611
chr21	2236370	2238950	iso_3936	156	123	176	214	277	223	387	225	271	121	188	611
chr21	2467061	2474780	iso_8460	617	476	738	849	511	515	718	770	911	532	1047	2243
chr21	2467061	2474780	iso_3943	617	476	738	849	511	515	718	770	911	532	1047	2243
chr21	2803371	2805644	iso_8703	304	143	100	201	568	680	268	304	549	1922	203	121
chr21	3215093	3219086	iso_3948	4709	4141	2612	3143	5058	6134	8237	10563	18852	13324	7691	15341
chr21	3215093	3223202	iso_9413	7540	6569	4258	4932	7349	10073	11989	17843	28742	23855	15065	23143
chr21	3215093	3224370	iso_9376	7910	6942	4421	5139	7553	10515	12749	18840	30642	25053	15680	25803
chr21	3215093	3227514	iso_3950	7963	6982	4489	5210	7586	10579	12819	19018	30830	25279	15868	26061
chr21	3215093	3227524	iso_8390	7963	6982	4489	5210	7586	10579	12819	19018	30830	25279	15868	26061
chr21	3215093	3227524	iso_3949	7963	6982	4489	5210	7586	10579	12819	19018	30830	25279	15868	26061
chr21	3730238	3733318	iso_3964	61	34	66	61	16	9	59	34	6	7	531	931
chr21	4069872	4072797	iso_3967	538	446	813	1035	757	653	1066	754	910	252	348	1360
chr21	4229550	4230475	iso_3969	4	8	1	1	24	13	3	6	5	12	106	90
chr21	4295432	4299251	iso_3972	2066	1311	3417	3104	1466	1740	1112	1474	922	1098	2558	1828
chr21	4295432	4300385	iso_3973	2260	1434	3763	3424	1708	2007	1298	1701	1058	1223	2768	2113
chr21	4402614	4403929	iso_3978	162	114	95	214	47	42	119	39	21	58	35	32
chr21	4413907	4422419	iso_3979	1058	851	1737	2200	598	430	1228	931	1012	1156	491	335
chr21	4656675	4666618	iso_3983	1462	1023	1475	1541	750	669	1489	1228	1670	1105	1822	2857
chr21	4666775	4669919	iso_3984	614	340	764	680	938	872	8136	8728	3689	3570	737	933
chr21	4666775	4669919	iso_8588	614	340	764	680	938	872	8136	8728	3689	3570	737	933
chr21	4889556	4897236	iso_3989	1413	817	331	445	18	18	641	995	459	830	753	734
chr21	4891390	4894297	iso_3990	792	466	177	244	6	7	126	150	68	156	270	285
chr21	4910647	4918057	iso_3991	656	473	596	674	151	184	381	416	484	398	1345	1904
chr21	5500684	5513982	iso_4001	1820	1658	1676	1907	2358	3133	1342	1265	1529	625	666	1373
chr21	5514083	5520676	iso_9253	141	112	100	136	677	794	596	564	937	359	374	744
chr21	5576705	5580110	iso_4004	17	12	6	2	47378	39191	19	25	5	4	24	26
chr21	5658127	5663098	iso_4011	229	185	302	314	297	249	243	278	259	136	782	1067
chr21	5658131	5662304	iso_9037	217	169	290	301	274	234	224	260	242	128	767	1046
chr21	5658131	5663098	iso_4010	229	185	302	314	297	249	243	278	259	136	781	1067
chr21	5658900	5659469	iso_4012	21	22	37	28	13	24	19	27	38	6	48	104
chr21	5721445	5727406	iso_4014	401	293	1179	848	138	129	80	102	26	23	234	206
chr21	6059284	6060795	iso_4017	48	35	41	62	64	37	51	72	652	1016	22	23
chr21	6384634	6387060	iso_8884	1979	1102	2132	2031	7386	9345	12865	7222	4431	3771	47733	70256
chr21	6443748	6448738	iso_4027	81	46	21	24	27	11	111	60	23	3	449	1104
chr21	6528410	6530226	iso_4029	44	19	16	30	117	219	153	73	26	40	214	93
chr21	6530992	6532086	iso_4030	47	26	41	70	177	313	109	81	25	70	267	85
chr21	6532105	6536969	iso_4031	217	109	129	218	917	1384	412	479	94	295	1111	308
chr21	6536982	6540276	iso_4032	111	66	75	94	490	735	226	272	61	213	654	162
chr21	6540301	6541626	iso_4033	66	53	64	88	528	682	176	272	47	204	610	110
chr21	6541119	6544316	iso_4034	153	70	101	102	815	866	281	348	112	243	625	177
chr21	6541868	6545457	iso_4035	197	84	129	137	1085	1197	382	440	152	330	825	262
chr21	6543041	6544316	iso_4036	64	29	42	42	320	420	93	157	37	121	266	72
chr21	6544325	6544769	iso_4037	45	22	25	36	293	349	74	108	26	91	216	51
chr21	6545016	6556539	iso_4038	575	330	377	585	4366	5858	1695	1922	574	2153	3534	1141
chr21	6584222	6586403	iso_4039	1012	820	760	1175	73	58	240	239	12	22	89	66
chr21	6593890	6598630	iso_4040	110	83	155	210	65	57	971	1638	146	255	313	227
chr22	8833	12529	iso_4043	869	528	850	996	266	227	440	473	300	270	258	247
chr22	333901	337090	iso_8839	292	225	304	441	267	257	384	445	465	252	901	1363
chr22	1192335	1200777	iso_4049	269	232	224	235	134	120	224	281	127	60	1713	3837
chr22	1577427	1581737	iso_4052	4665	4034	4116	4647	761	982	917	1327	742	497	2118	2834
chr22	2190051	2193857	iso_4056	888	692	572	619	944	1075	1911	2051	1100	668	508	709
chr22	2280360	2282410	iso_4059	417	314	450	511	66	49	150	178	73	57	1776	1982
chr22	2331111	2339662	iso_4060	855	548	1516	1694	352	503	1795	1726	48	306	247	129
chr22	2445621	2452621	iso_4064	51	27	497	738	15	29	5	2	146	237	4895	2037
chr22	2452593	2454220	iso_4065	29	15	490	705	21	30	1	1	32	38	1475	729
chr22	2452593	2454220	iso_4066	29	15	490	705	21	30	1	1	32	38	1475	729
chr22	2455495	2459659	iso_4067	91	69	1359	1911	186	200	37	54	129	162	2093	1369
chr22	2584810	2588761	iso_4069	539	433	454	585	245	184	818	897	1319	606	485	919
chr22	2597489	2604723	iso_4071	326	255	288	285	322	297	282	311	196	134	1979	1897
chr22	2597489	2607212	iso_4072	488	404	475	441	512	478	422	484	338	233	2714	2698
chr22	2611620	2615917	iso_4073	410	213	1906	1780	1479	1674	111	264	105	102	548	330
chr22	2616474	2620824	iso_4074	273	120	1123	1157	236	341	78	174	76	69	999	637
chr22	2622527	2625144	iso_4075	100	46	414	438	67	100	19	41	35	20	12	10
chr22	2802970	2805327	iso_9491	36	37	33	30	109	77	79	438	57	218	218	177
chr22	2802970	2805682	iso_8654	45	45	44	41	131	100	95	564	66	260	258	202
chr22	2949144	2952382	iso_4092	2308	1495	1400	1907	250	279	130	105	102	41	28	42
chr22	2991352	2993864	iso_4095	359	256	429	405	533	500	1079	837	1187	603	1088	2529
chr23	155923	159292	iso_4103	935	798	919	1108	1288	886	1284	1121	994	381	2834	6490
chr23	160970	168401	iso_4104	1551	1273	703	811	294	228	790	811	1143	608	186	402
chr23	215227	217127	iso_4105	916	590	1547	1596	918	532	547	617	455	285	394	560
chr23	217299	230371	iso_4106	130	105	242	214	410	551	327	295	137	83	2407	3985
chr23	230937	233001	iso_8686	1	4	0	1	42	15	654	401	244	286	169	117
chr23	232942	233534	iso_4107	0	0	0	0	11	7	166	119	56	105	51	16
chr23	590527	593875	iso_4111	1223	878	198	178	19930	23249	1089	1201	17	10	41	11
chr23	590527	593875	iso_4113	1223	878	198	178	19930	23249	1089	1201	17	10	41	11
chr23	590527	593875	iso_4112	1223	878	198	178	19930	23249	1089	1201	17	10	41	11
chr23	1766778	1767912	iso_4124	22	23	18	38	43	38	171	92	3358	4749	794	708
chr23	1768246	1770590	iso_4125	67	52	58	65	61	71	194	193	4632	9173	1765	779
chr23	2058513	2059826	iso_4131	89	58	74	127	493	750	878	480	213	210	120	51
chr23	2106189	2107626	iso_4132	91	46	219	309	225	384	391	453	245	393	235	152
chr23	2138186	2138574	iso_4133	29	27	16	97	20	11	92	45	31	62	3	1
chr23	2140640	2147518	iso_4134	331	252	304	673	216	145	909	830	510	538	54	37
chr23	2350536	2353665	iso_9380	279	248	318	420	229	237	385	366	178	123	167	366
chr23	2355681	2360610	iso_4143	2470	1654	3370	4068	3296	3584	3731	3043	2781	1848	2024	2596
chr23	2501714	2504603	iso_4146	58	23	63	58	11	11	59	62	38	15	201	393
chr23	2506215	2508662	iso_8813	286	109	211	202	230	131	406	171	404	103	235	353
chr23	2596529	2619276	iso_4149	1651	1171	5282	5551	495	653	842	933	564	397	384	648
chr23	2692116	2697984	iso_4153	1197	852	1624	1627	351	288	505	238	257	41	1298	6255
chr23	2692116	2697984	iso_4154	1197	852	1624	1627	351	288	505	238	257	41	1298	6255
chr23	3152770	3153565	iso_4156	32	13	25	25	9	6	29	12	18	11	111	93
chr23	3162450	3169615	iso_4157	427	339	742	688	779	726	720	845	999	370	983	1373
chr23	3173480	3174871	iso_4158	9	4	21	18	3057	4364	26	12	37	7	69	85
chr23	3178313	3180744	iso_8560	45	26	52	92	689	934	149	180	29	82	55	17
chr23	3198410	3202533	iso_4159	4576	3934	2526	3693	70	43	271	127	90	15	2770	21025
chr23	3708291	3714118	iso_4163	966	783	1309	1589	705	628	963	865	1068	477	1059	2356
chr23	3987162	3988229	iso_4166	83	41	55	55	64	45	124	136	61	118	277	122
chr23	4013770	4015444	iso_4167	196	184	225	300	184	128	217	191	286	90	49	179
chr23	4031297	4033270	iso_4169	1232	708	760	1018	1438	1762	333	107	131	115	420	576
chr23	4033547	4034028	iso_4170	243	117	91	189	191	350	43	15	18	41	151	57
chr23	4045709	4048946	iso_4172	476	306	222	292	449	787	541	352	534	1575	508	148
chr23	4136126	4140639	iso_4175	556	450	1035	1236	281	286	290	355	367	195	535	1224
chr23	4163709	4166542	iso_8551	850	521	1121	941	507	547	491	692	463	414	1222	1009
chr23	4184857	4187297	iso_4176	6	2	7	6	5	2	12	8	6	0	65	288
chr23	4291813	4296016	iso_4178	67	182	44	254	1151	3812	440	495	1189	3019	50	50
chr23	4294414	4296016	iso_4179	67	182	44	254	1075	3609	439	495	1187	3016	45	49
chr23	4344583	4358556	iso_4181	3284	2995	6023	7595	2210	2341	3186	3921	1917	1180	2064	4865
chr23	4345672	4353032	iso_4183	1717	1422	2764	3383	911	947	1692	1703	986	462	874	2837
chr23	4345672	4353032	iso_4182	1717	1422	2764	3383	911	947	1692	1703	986	462	874	2837
chr23	4890087	4892313	iso_4187	924	614	1253	1003	1083	1025	1142	1471	840	665	1859	1669
chr23	5050972	5054777	iso_4190	339	304	389	571	137	240	127	240	118	129	252	228
chr23	5103395	5107527	iso_4192	1088	842	1018	1078	990	1010	1428	1335	1755	1030	1418	2546
chr23	5108165	5109945	iso_4193	97	72	133	123	49	38	87	99	53	63	372	222
chr23	5116856	5117485	iso_4196	14	9	22	38	19	34	116	65	45	76	107	81
chr23	5174855	5178619	iso_4200	142	141	213	240	132	122	375	270	408	209	319	537
chr23	5174855	5179185	iso_4201	160	150	225	259	141	131	405	296	443	224	381	616
chr23	5197043	5212465	iso_4202	100	75	68	135	34	72	1796	1771	257	371	148	88
chr23	5230442	5235698	iso_4203	308	245	1021	1004	35	60	26	22	2	0	45	31
chr23	5250950	5252925	iso_4204	613	370	315	348	38	28	185	170	68	67	353	212
chr23	5274206	5280894	iso_9195	547	453	606	779	1323	1440	1544	1313	1150	584	329	428
chr23	5281656	5287145	iso_4207	712	570	390	429	126	101	130	98	90	96	564	520
chr23	5337684	5343714	iso_4209	865	372	956	956	1133	923	517	529	495	291	84	112
chr23	5346408	5350141	iso_4210	505	248	385	462	439	412	195	202	233	134	54	31
chr23	5568324	5573393	iso_4218	603	496	744	954	488	462	584	583	1019	316	646	2652
chr23	5568324	5578950	iso_8441	911	694	1072	1328	665	738	900	935	1407	865	2778	3821
chr23	5568324	5578950	iso_4219	911	694	1072	1328	665	738	900	935	1407	865	2778	3821
chr23	5569270	5578950	iso_4220	786	588	966	1142	555	640	811	830	1142	782	2746	3570
chr23	5695428	5705541	iso_4222	1152	831	1488	1619	331	241	508	448	649	294	320	767
chr23	5695428	5705541	iso_8434	1152	831	1488	1619	331	241	508	448	649	294	320	767
chr23	5708088	5715399	iso_4224	457	416	940	1219	295	315	322	441	764	533	214	469
chr23	5708088	5715402	iso_4226	457	416	940	1219	295	315	322	441	764	533	214	469
chr23	5708088	5715402	iso_4225	457	416	940	1219	295	315	322	441	764	533	214	469
chr24	27150	32247	iso_4229	751	532	862	842	499	440	1222	1273	1338	999	489	743
chr24	27150	32247	iso_4230	751	532	862	842	499	440	1222	1273	1338	999	489	743
chr24	27150	32500	iso_8396	753	539	867	848	501	441	1223	1275	1341	999	489	754
chr24	121520	128828	iso_4233	7159	4008	5993	7148	456	577	182	206	22	24	204	238
chr24	209966	212733	iso_4235	56	41	76	104	24	27	1777	3421	67	183	265	98
chr24	241767	242286	iso_4237	11	5	10	17	51	69	30	13	4	11	18	5
chr24	242906	243893	iso_8780	17	13	15	22	81	75	14	23	3	30	8	6
chr24	243838	246008	iso_4238	50	29	36	57	195	160	48	35	14	53	30	16
chr24	1545911	1553158	iso_4254	482	349	529	419	213	170	380	578	243	181	1450	1025
chr24	1563240	1580763	iso_4255	430	317	449	431	216	187	8012	7389	1355	1097	652	695
chr24	1580775	1581519	iso_4256	88	61	92	88	75	52	1668	1377	283	202	124	201
chr24	2898208	2900045	iso_8890	473	308	547	353	98	71	371	489	51	35	113	134
chr24	3069342	3074490	iso_4269	30094	20956	36505	40517	15375	18096	26023	47455	23058	25742	18439	26131
chr24	3069342	3074490	iso_9095	30094	20956	36505	40517	15375	18096	26023	47455	23058	25742	18439	26131
chr24	3069342	3074490	iso_4268	30094	20956	36505	40517	15375	18096	26023	47455	23058	25742	18439	26131
chr24	3069342	3074490	iso_4267	30094	20956	36505	40517	15375	18096	26023	47455	23058	25742	18439	26131
chr24	4167770	4172020	iso_4276	31926	19986	12695	11597	308	195	144	206	24	47	129	173
chr24	4271301	4272120	iso_4277	280	166	84	78	2	0	4	4	1	5	5	4
chr24	4418795	4421993	iso_4280	291	227	252	273	991	902	160	140	104	42	390	512
chr24	5088227	5092612	iso_4283	135	159	215	286	99	91	209	167	174	78	558	1052
chr24	5094924	5099474	iso_4284	434	265	381	466	323	341	400	385	905	1770	1220	2104
chr24	5210753	5218886	iso_8275	2468	2038	2816	3583	548	507	1298	1246	965	544	3045	5451
chr24	5257777	5267404	iso_8271	6390	4498	5630	4465	1077	1139	1208	1289	982	1220	4081	2965
chr24	5398826	5400558	iso_4288	0	3	6	1	169	107	8064	5684	50	21	2	4
chr24	5401332	5409247	iso_4289	1058	900	645	1034	5694	6333	422	559	83	183	397	292
chr24	5480460	5482962	iso_4292	18	36	28	42	133	73	237	352	218	176	134	86
chr24	5483750	5493840	iso_4294	290	254	437	492	284	263	342	406	401	196	1523	2430
chr24	5507553	5511365	iso_4295	103	110	86	69	77	70	230	212	84	30	1065	1824
chr24	5657139	5658930	iso_8281	2052	1317	1726	2215	3466	2687	4957	4483	3044	1909	2206	3370
chr24	5657175	5658930	iso_4297	2052	1317	1726	2215	3466	2687	4957	4483	3044	1909	2206	3370
chr24	5660911	5668269	iso_4298	379	241	483	459	252	209	8172	7299	4556	4513	906	1285
chr24	5669133	5683405	iso_8421	2227	1427	2187	2156	1001	595	2935	2442	5256	3430	1773	5195
chr24	5797942	5800877	iso_4303	68	39	22	34	9	4	132	81	13	9	1351	1021
chr24	6128892	6131539	iso_4304	158	108	156	193	35	36	442	470	297	181	72	88
chr24	6222593	6225790	iso_4306	21	18	45	87	8	12	574	661	167	56	57	91
chr25	0	2255	iso_4309	104	71	96	141	68	92	122	82	72	77	318	496
chr25	36240	41924	iso_4311	1701	1222	2472	2908	881	636	2287	1215	2736	525	512	3673
chr25	68064	79501	iso_4312	767	483	1804	1975	136	149	178	195	76	106	629	767
chr25	402526	402932	iso_4315	1	2	0	2	0	0	1	1	0	2	78	37
chr25	402899	403537	iso_4316	0	0	1	0	0	1	1	0	0	1	77	59
chr25	457151	458080	iso_4319	723	453	644	741	1154	963	2486	817	1830	734	453	1866
chr25	462742	464226	iso_4320	57	36	146	127	92	76	84	103	47	66	3218	2513
chr25	684868	689003	iso_4323	1067	787	1130	1411	1010	906	1622	943	730	489	904	1764
chr25	708516	710866	iso_4324	60	29	14	32	1123	700	132	11	3	3	140	138
chr25	1268010	1270368	iso_4331	206	83	101	151	235	186	1042	449	362	559	135	147
chr25	1334534	1346124	iso_4335	3142	2226	2658	3373	2722	2631	3296	2780	2351	1600	1305	2724
chr25	1363685	1366464	iso_4336	3	5	4	5	8	8	10	8	1	8	1792	1242
chr25	1378196	1379695	iso_4337	596	300	522	476	232	198	105	128	99	144	314	194
chr25	1437981	1442848	iso_4341	223	180	252	246	138	78	246	204	189	76	243	799
chr25	1456680	1467249	iso_4343	7545	6211	6008	7342	101	97	105	120	50	16	536	851
chr25	1665779	1668480	iso_4351	4302	2586	6809	5467	51	51	63	96	80	296	1510	714
chr25	1675541	1677144	iso_4352	15	12	19	17	35	36	117	70	3779	2606	345	246
chr25	1679100	1680107	iso_4353	435	196	145	221	333	510	747	435	268	626	1133	668
chr25	1696286	1699760	iso_4355	370	288	430	501	450	388	832	842	1458	1314	876	1235
chr25	1696286	1699760	iso_4354	370	288	430	501	450	388	832	842	1458	1314	876	1235
chr25	1696579	1699760	iso_4356	361	281	427	485	446	385	814	840	1444	1298	836	1193
chr25	1710926	1712788	iso_4359	252	161	267	462	254	256	332	225	213	238	765	574
chr25	1746837	1750456	iso_4361	358	237	374	515	421	564	1959	1595	1413	1813	2075	2260
chr25	1767557	1769413	iso_4364	2001	1612	1528	1367	22	21	14	12	4	13	279	265
chr25	1787730	1788235	iso_4366	92	45	38	80	33	69	73	57	26	48	150	95
chr25	1877559	1881746	iso_9048	71	73	55	69	212	239	1334	1279	822	459	111	156
chr25	2094686	2096151	iso_4372	13	5	802	1406	11	11	667	177	361	444	241	426
chr25	2174082	2177890	iso_4375	471	298	434	503	487	560	741	755	674	896	1116	674
chr25	2178238	2181388	iso_4376	260	160	233	238	456	631	1321	1641	923	2015	2405	951
chr25	2178238	2181460	iso_4377	260	160	233	238	456	631	1321	1641	923	2015	2407	951
chr25	2181548	2183193	iso_4378	821	445	550	783	805	1261	2003	1046	671	1043	2088	1458
chr26	178003	179929	iso_4382	63	37	81	84	34	65	148	63	65	55	870	1116
chr26	467845	474971	iso_4389	711	616	1073	1224	895	780	645	782	784	466	595	1001
chr26	483296	484543	iso_4390	212	145	226	283	160	246	532	287	111	237	876	244
chr26	515426	520826	iso_4393	201	172	453	399	405	434	209	434	322	173	1280	1038
chr26	515426	520826	iso_8795	201	172	453	399	405	434	209	434	322	173	1280	1038
chr26	602461	607093	iso_8482	438	331	176	188	427	424	1848	1200	1646	2049	248	182
chr26	789056	792911	iso_4401	0	0	1	0	8669	8910	4	6	0	0	4	4
chr26	789056	794434	iso_8445	0	0	1	0	17852	17750	5	17	0	0	8	5
chr26	792136	795074	iso_8692	0	0	3	0	27629	28854	7	24	1	0	9	1
chr26	796632	799856	iso_4402	0	0	0	0	24729	37934	4	18	1	0	13	4
chr26	1081180	1084448	iso_4407	131	113	100	111	11	9	38	23	2	6	344	687
chr26	1081184	1084448	iso_4406	131	113	100	111	11	9	38	23	2	6	344	687
chr26	1088268	1094741	iso_4408	1080	758	872	918	587	673	882	655	333	452	3163	2735
chr26	1095868	1102793	iso_4409	1170	905	809	979	785	871	677	591	520	332	1127	2241
chr26	1259394	1259761	iso_4410	331	235	844	1037	36	60	146	199	125	212	79	55
chr26	1263341	1270694	iso_9061	1386	1009	1090	1059	417	392	645	797	491	552	2916	2285
chr26	1527497	1529587	iso_4415	496	279	392	444	481	344	462	403	308	149	779	641
chr26	1527522	1533451	iso_4416	1355	981	1817	1893	2157	1666	2096	1617	1287	670	2342	3239
chr26	1529309	1531633	iso_4417	482	331	814	875	831	615	586	456	499	206	699	790
chr26	1585943	1588487	iso_4419	13	16	60	77	185	212	69	79	72	92	166	213
chr26	1677960	1683666	iso_4421	1109	670	835	961	129	210	483	491	528	607	153	143
chr26	1733451	1746811	iso_4423	1025	743	494	726	1386	2741	177	190	363	332	78	87
chr26	2325313	2330094	iso_4431	39	26	78	59	16	6	17	16	17	7	788	487
chr26	2325313	2330094	iso_4430	39	26	78	59	16	6	17	16	17	7	788	487
chr26	2442798	2447837	iso_4434	2639	2258	146	225	82	55	136	162	347	213	77	55
chr26	2567787	2574394	iso_4439	703	698	1392	1558	564	635	495	641	403	656	613	734
chr26	2584773	2585467	iso_4440	13	8	5	9	17	11	8	14	460	1072	10	11
chr26	2585675	2586379	iso_4441	7	7	13	3	13	15	16	20	450	1368	13	4
chr26	3157213	3160673	iso_4449	1199	824	1052	1309	3908	3769	2335	2264	2421	2530	2909	3909
chr26	3157213	3160945	iso_4448	1202	825	1060	1320	3908	3772	2335	2264	2422	2530	2913	3912
chr26	3660352	3671397	iso_8524	231	203	191	184	241	278	231	335	158	92	2386	3456
chr26	3668358	3671397	iso_4456	66	47	49	39	56	95	66	83	40	26	878	1113
chr26	3854515	3871704	iso_4461	3474	2645	4297	4523	4743	4346	4775	4464	4413	1916	3621	8982
chr26	3859154	3864550	iso_4462	1217	891	1559	1547	1542	1214	1618	1242	1531	508	979	3146
chr26	4029695	4034360	iso_4465	438	318	432	555	454	425	205	190	73	97	467	728
chr26	4560072	4567092	iso_4476	143	120	1924	1883	285	219	131	133	210	111	108	166
chr26	4560730	4567092	iso_4477	141	120	1920	1881	284	219	128	129	210	110	106	163
chr26	4617188	4626095	iso_4478	429	314	540	759	202	206	210	246	272	647	2457	1855
chr26	4655938	4660350	iso_4481	358	225	347	332	535	371	674	428	496	316	802	1631
chr26	4655938	4660480	iso_4482	358	225	347	332	535	371	674	428	496	316	812	1634
chr26	4660628	4674900	iso_4484	637	466	728	775	495	379	973	909	608	316	1523	1916
chr26	4660628	4674900	iso_4483	637	466	728	775	495	379	973	909	608	316	1523	1916
chr26	5019489	5020522	iso_4489	661	399	292	467	790	1966	895	788	511	1469	2416	664
chr27	1251444	1253503	iso_4507	17	10	19	21	30	11	9	11	17	5	159	137
chr27	1578809	1580341	iso_4513	196	111	178	211	314	422	733	675	440	2953	585	71
chr27	2646736	2662831	iso_4520	160	95	157	183	652	658	1031	2781	4	7	89	113
chr27	2658643	2662831	iso_4521	67	47	71	87	349	362	519	1461	0	2	41	37
chr27	2764306	2769356	iso_4525	417	369	72	75	112	97	214	145	114	45	141	201
chr27	2764306	2773994	iso_4526	818	754	101	121	143	122	242	160	127	52	267	298
chr27	2764306	2773995	iso_4527	818	754	101	121	143	122	242	160	127	52	267	298
chr27	2781429	2788443	iso_4528	481	403	498	547	316	234	232	312	310	146	1181	2378
chr27	2829188	2832470	iso_9409	806	525	377	481	247	403	1050	454	509	597	1907	1788
chr27	2829188	2833828	iso_9486	877	592	390	506	256	419	1129	482	601	660	2078	2114
chr27	2829188	2834420	iso_9314	1002	687	400	524	256	419	1130	485	663	682	2353	2353
chr27	2829188	2834422	iso_8274	1002	687	400	524	256	419	1130	485	663	682	2353	2353
chr27	2829188	2834422	iso_4529	1002	687	400	524	256	419	1130	485	663	682	2353	2353
chr27	2829188	2834422	iso_4530	1002	687	400	524	256	419	1130	485	663	682	2353	2353
chr27	2829445	2834422	iso_4531	968	664	400	516	256	419	1130	482	655	677	2339	2345
chr27	2938308	2959139	iso_4534	7325	5079	5760	7318	628	633	1061	921	712	576	7307	12605
chr27	2938308	2959139	iso_9081	7325	5079	5760	7318	628	633	1061	921	712	576	7307	12605
chr27	2944397	2959139	iso_4536	3619	2302	2608	3533	193	226	387	344	264	157	3934	6315
chr27	2944397	2959139	iso_4535	3619	2302	2608	3533	193	226	387	344	264	157	3934	6315
chr27	2980519	2984877	iso_4537	331	164	246	278	367	603	2063	2491	889	1961	880	369
chr27	3268024	3268864	iso_4541	3	0	1	8	1	0	1	1	5	3	123	196
chr27	3366762	3370933	iso_4544	512	401	542	544	1094	1251	1128	1035	788	557	490	727
chr27	3366762	3370933	iso_8528	512	401	542	544	1094	1251	1128	1035	788	557	490	727
chr27	3366815	3370933	iso_4545	511	399	538	542	1093	1251	1124	1031	787	555	476	723
chr27	3417618	3418811	iso_4549	37	38	68	90	99	66	105	115	295	280	30	33
chr27	3491803	3495385	iso_4550	641	566	450	712	4610	7950	1180	1809	1533	1715	352	566
chr27	3491803	3495479	iso_4551	644	569	453	716	4622	7981	1194	1817	1548	1725	353	571
chr27	3491803	3495479	iso_4552	644	569	453	716	4622	7981	1194	1817	1548	1725	353	571
chr27	3491803	3495542	iso_4553	644	569	453	716	4622	7981	1194	1817	1548	1726	353	571
chr27	3491803	3495542	iso_4554	644	569	453	716	4622	7981	1194	1817	1548	1726	353	571
chr27	3848748	3849823	iso_4557	229	184	225	264	123	117	212	121	199	48	251	710
chr27	3871764	3872784	iso_4558	262	204	143	247	34	41	611	1453	480	535	95	87
chr27	3873612	3879109	iso_4559	271	135	287	340	185	190	361	226	131	188	1108	738
chr27	3899848	3901657	iso_4560	440	292	356	351	779	971	793	802	611	946	1521	899
chr27	4046896	4048907	iso_4564	1814	1046	1655	1991	4048	3652	5362	4511	3632	2438	2935	5168
chr27	4046896	4048907	iso_8509	1814	1046	1655	1991	4048	3652	5362	4511	3632	2438	2935	5168
chr27	4046896	4048907	iso_4563	1814	1046	1655	1991	4048	3652	5362	4511	3632	2438	2935	5168
chr27	4109949	4114573	iso_4565	1128	672	297	397	81	71	176	146	155	250	932	730
chr27	4119506	4121903	iso_4566	4087	2577	4278	5299	5242	4623	8617	8363	5372	5032	9884	11413
chr27	4119506	4121903	iso_4567	4087	2577	4278	5299	5242	4623	8617	8363	5372	5032	9884	11413
chr27	4315601	4317989	iso_4568	858	609	728	816	649	719	734	794	1178	976	1480	1079
chr27	4701289	4724953	iso_4573	2832	1994	2613	2711	406	293	1617	1758	25659	11503	2747	5163
chr27	4701289	4724953	iso_4574	2832	1994	2613	2711	406	293	1617	1758	25659	11503	2747	5163
chr27	4874852	4876650	iso_4576	360	287	563	718	688	895	510	422	1358	1608	167	118
chr27	4896534	4911596	iso_4577	1662	1205	1986	2722	2510	2441	1963	2500	6069	6227	2282	2137
chr27	4929750	4957154	iso_4578	5796	4421	5899	6344	1851	1803	1820	2178	752	484	1768	2379
chr27	4963449	4965914	iso_4580	275	171	331	466	145	189	2207	1117	803	1579	683	327
chr27	5032251	5034706	iso_8865	293	219	259	436	679	791	656	707	561	514	1536	1259
chr27	5032251	5034708	iso_8525	293	219	259	436	679	791	656	707	561	514	1536	1259
chr27	5032251	5034708	iso_8735	293	219	259	436	679	791	656	707	561	514	1536	1259
chr27	5032251	5034708	iso_9112	293	219	259	436	679	791	656	707	561	514	1536	1259
chr27	5078222	5081805	iso_4582	42	29	22	21	2997	2434	251	428	189	439	236	127
chr27	5081929	5087475	iso_4583	4	3	2	1	422	439	9248	7301	17280	10964	33	25
chr27	5092937	5094509	iso_4584	148	102	98	145	160	256	358	159	321	356	598	591
chr27	5092937	5094966	iso_4585	166	113	103	152	176	294	407	172	336	382	703	641
chr27	5095326	5098765	iso_4586	537	474	615	688	411	392	647	681	587	346	510	952
chr27	5102145	5105302	iso_8550	222	218	200	391	474	397	823	598	973	886	339	435
chr27	5102272	5105302	iso_4587	216	213	198	377	464	391	789	587	954	861	326	414
chr27	5196588	5199766	iso_4590	656	396	376	397	36	35	113	101	53	99	165	100
chr28	8860	12354	iso_4596	113	53	67	83	135	102	427	308	185	79	421	288
chr28	8860	12354	iso_4595	113	53	67	83	135	102	427	308	185	79	421	288
chr28	8860	12742	iso_4597	118	56	72	85	135	104	429	311	187	79	486	423
chr28	1030018	1033810	iso_4606	586	406	547	686	246	205	165	174	95	80	408	574
chr28	1229976	1232616	iso_4610	6	8	10	10	6	9	5	6	11	16	465	997
chr28	1262064	1262561	iso_4611	199	110	143	219	0	2	0	0	3	13	53	10
chr28	1266458	1271112	iso_4612	202	233	159	327	48	78	363	367	79	148	926	802
chr28	1271155	1274805	iso_4613	508	398	642	673	942	1251	694	773	539	785	861	825
chr28	1271155	1274805	iso_8899	508	398	642	673	942	1251	694	773	539	785	861	825
chr28	1294398	1303128	iso_4615	1134	857	1651	2187	901	854	2336	1267	1478	928	900	2202
chr28	1458870	1462627	iso_4616	5	2	21	15	174	121	1	0	3	0	760	734
chr28	1459396	1462627	iso_4617	4	2	15	5	149	94	1	0	3	0	600	536
chr28	1466908	1476382	iso_4618	3234	1890	2861	2740	78	64	125	118	35	221	582	460
chr28	1712026	1720860	iso_8475	551	381	717	754	1088	734	2078	1658	1392	658	1685	4443
chr28	1722434	1724437	iso_4620	233	150	317	377	118	110	157	119	46	102	165	110
chr28	2359563	2366060	iso_4630	445	270	440	524	525	457	578	307	400	208	978	1102
chr28	2359563	2366060	iso_4629	445	270	440	524	525	457	578	307	400	208	978	1102
chr28	2361930	2366060	iso_4631	291	176	283	333	358	264	397	194	309	100	577	835
chr28	2372711	2374656	iso_4632	602	620	436	647	2325	4357	875	925	1534	1383	971	903
chr28	2490352	2491706	iso_4637	8	4	5	3	406	612	13	10	15	31	9	1
chr28	2581983	2582539	iso_4638	115	63	108	199	10	6	8	10	7	8	6	4
chr28	2617572	2628569	iso_8859	5536	4172	4117	5031	22738	27630	17211	11886	14654	12191	1786	2873
chr28	2856931	2858017	iso_4642	1026	543	825	834	909	1073	985	1205	2434	4382	504	364
chr28	2971655	2974651	iso_4645	2743	2147	3337	3988	2720	1903	1986	1009	1628	543	621	2350
chr28	2971655	2976251	iso_4646	4875	3714	7572	7685	6064	3903	3522	2548	2971	1476	1282	3914
chr28	2971655	2976251	iso_4647	4875	3714	7572	7685	6064	3903	3522	2548	2971	1476	1282	3914
chr28	2972962	2976251	iso_4649	4109	3213	6838	6746	5397	3344	2836	2278	2608	1319	1013	3246
chr28	2972962	2976251	iso_4648	4109	3213	6838	6746	5397	3344	2836	2278	2608	1319	1013	3246
chr28	3057010	3063606	iso_4650	396	327	315	423	196	102	341	287	280	173	2014	3259
chr28	3098094	3099982	iso_8533	2070	1096	2109	2074	3034	2606	4064	3629	1742	2502	4959	3512
chr28	3098094	3099982	iso_4651	2070	1096	2109	2074	3034	2606	4064	3629	1742	2502	4959	3512
chr28	3098094	3099982	iso_8451	2070	1096	2109	2074	3034	2606	4064	3629	1742	2502	4959	3512
chr28	3098094	3099982	iso_8688	2070	1096	2109	2074	3034	2606	4064	3629	1742	2502	4959	3512
chr28	3207117	3208408	iso_4654	184	610	132	1106	637	439	792	769	1489	4154	309	378
chr28	3317722	3319092	iso_4656	919	419	161	189	1	0	0	0	0	0	42	17
chr28	3319071	3319595	iso_4657	603	287	111	106	0	0	0	0	0	0	29	7
chr28	3427107	3432327	iso_4665	1270	933	1027	947	272	280	355	445	302	245	2568	2104
chr28	3427107	3432327	iso_4666	1270	933	1027	947	272	280	355	445	302	245	2568	2104
chr28	3432531	3447303	iso_8710	1613	1309	1976	2373	470	367	525	382	544	132	934	2374
chr28	3489308	3495010	iso_8902	159	147	387	407	135	122	267	189	323	161	806	985
chr28	3654970	3655605	iso_4675	72	29	83	86	23	29	51	31	31	34	122	118
chr28	3658433	3659774	iso_4676	148	112	99	147	84	132	203	169	169	185	1117	1286
chr28	3757455	3759227	iso_4678	1731	1181	1308	1078	230	262	464	453	263	359	347	295
chr28	3760547	3761984	iso_4679	108	86	58	101	305	285	957	804	407	1319	82	51
chr28	3919944	3924958	iso_4684	239	166	210	234	145	85	198	163	154	65	281	548
chr28	4053690	4055720	iso_4688	445	318	540	553	635	594	629	616	475	615	1232	1017
chr28	4053694	4055720	iso_4689	445	318	540	553	635	594	629	616	475	615	1232	1017
chr28	4053751	4055720	iso_4690	444	318	540	552	635	591	628	616	475	615	1227	1007
chr28	4084132	4095984	iso_4692	650	484	1004	1061	490	379	890	658	645	282	1704	3862
chr28	4180463	4181577	iso_8876	1460	982	785	989	395	415	2070	780	744	304	2049	6276
chr28	4189579	4194713	iso_4698	322	279	437	599	236	258	558	620	389	217	331	520
chr28	4195074	4199888	iso_4701	90	60	40	84	28135	29845	264	208	94	118	752	1976
chr28	4195074	4203277	iso_4702	98	64	41	87	39682	41419	276	220	103	134	984	2323
chr28	4195074	4203683	iso_4703	98	64	41	88	39683	41423	277	222	103	134	1005	2387
chr28	4195075	4196907	iso_9055	32	23	15	37	15670	15914	90	99	35	61	356	1181
chr28	4195544	4203683	iso_4700	85	58	35	73	39566	41314	224	152	82	79	875	2087
chr28	4195544	4203683	iso_4699	85	58	35	73	39566	41314	224	152	82	79	875	2087
chr3	2079930	2086610	iso_4716	218	168	269	254	233	189	448	387	751	395	396	945
chr3	2080087	2086610	iso_4718	218	166	269	253	233	188	446	387	751	395	388	942
chr3	2080087	2086610	iso_4717	218	166	269	253	233	188	446	387	751	395	388	942
chr3	2322877	2325977	iso_4722	448	369	447	729	588	423	466	519	511	156	376	1261
chr3	3206449	3208835	iso_4736	1612	907	1344	1506	21	25	39	30	32	35	87	62
chr3	4050656	4053570	iso_4743	21	10	18	27	9	14	18	31	11	23	324	175
chr3	4280221	4281012	iso_4748	72	41	75	95	58	47	121	94	61	52	111	84
chr3	8657555	8668266	iso_4771	786	540	948	1000	312	269	328	345	254	93	988	1963
chr3	9411626	9417697	iso_4784	4462	3794	4204	5112	8967	11656	5261	6600	5806	2618	7331	7447
chr3	9639717	9641294	iso_4792	22	10	19	12	12	9	25	10	3	3	380	413
chr3	11800001	11804649	iso_4799	357	315	409	481	2494	3492	780	568	829	247	699	1205
chr3	12996992	13027948	iso_4807	21157	14607	22798	20143	454	659	22	10	7	0	45	50
chr3	12996992	13027948	iso_4808	21157	14607	22798	20143	454	659	22	10	7	0	45	50
chr3	12996992	13027948	iso_4809	21157	14607	22798	20143	454	659	22	10	7	0	45	50
chr3	13121911	13124967	iso_4810	33	15	86	50	3	15	1	1	0	0	883	1592
chr3	14764536	14765676	iso_4820	21	25	15	30	11	13	113	102	30	28	3017	1507
chr3	14810172	14813702	iso_9468	20	13	37	33	28	16	44	22	22	5	462	1626
chr3	15743373	15746219	iso_4829	89	68	118	128	40	22	61	48	39	19	291	443
chr3	15743676	15746219	iso_4830	76	61	111	115	39	19	54	46	39	18	261	413
chr3	15766299	15769248	iso_4833	637	403	844	702	715	550	707	797	721	370	958	1606
chr3	15875120	15881867	iso_4835	807	660	972	1554	564	694	1279	945	810	709	2036	1657
chr3	15875120	15881867	iso_4834	807	660	972	1554	564	694	1279	945	810	709	2036	1657
chr3	15880018	15881157	iso_4836	470	391	674	944	373	486	712	531	432	508	1403	950
chr3	15885967	15891914	iso_9472	775	626	1014	1545	783	879	1157	1006	879	731	1773	1710
chr3	15885967	15893288	iso_8990	858	708	1116	1727	898	929	1251	1088	982	757	1819	1983
chr3	15885967	15893288	iso_8681	858	708	1116	1727	898	929	1251	1088	982	757	1819	1983
chr3	15885967	15893288	iso_8315	858	708	1116	1727	898	929	1251	1088	982	757	1819	1983
chr3	15886482	15893288	iso_4837	819	680	1099	1650	875	871	1176	1049	968	687	1542	1892
chr3	16272184	16276725	iso_4848	305	285	422	503	319	269	648	696	856	488	166	347
chr3	17166969	17173388	iso_4863	638	419	2988	2336	37	46	81	63	6	1	117	158
chr3	17370577	17384263	iso_4868	593	421	708	971	621	626	759	645	1316	905	2293	3974
chr3	19516511	19519538	iso_4876	20	12	152	190	260	285	73	110	8	3	14	28
chr3	19516511	19519538	iso_9027	20	12	152	190	260	285	73	110	8	3	14	28
chr3	19516511	19519538	iso_4875	20	12	152	190	260	285	73	110	8	3	14	28
chr3	21266741	21271103	iso_4886	197	110	219	257	256	229	226	139	321	156	292	982
chr3	26486305	26495672	iso_8852	21548	15391	8234	10762	2142	1993	2937	2818	2106	702	5704	21366
chr3	29630915	29635129	iso_4919	903	718	513	577	150	110	216	237	253	131	944	2417
chr3	29630915	29636882	iso_4920	1387	1016	742	807	205	183	269	317	320	204	1623	3020
chr3	29662574	29665489	iso_8415	110	68	672	908	705	862	308	353	36	97	199	107
chr3	29666521	29668749	iso_4923	75	44	406	553	350	428	197	175	14	41	100	83
chr3	33000767	33005257	iso_4950	249	217	335	433	232	219	227	226	171	77	360	821
chr3	34018223	34030968	iso_4957	2422	1923	3100	3803	2041	1541	3370	2689	2874	1447	3980	10652
chr3	34020766	34030968	iso_4958	2130	1677	2639	3295	1741	1359	2980	2374	2421	1344	3758	9410
chr3	35039116	35040875	iso_4969	3	1	1	2	60	86	1	0	8	0	77	109
chr3	37803177	37804511	iso_4995	132	95	121	173	181	257	208	182	134	116	203	211
chr3	39337661	39339833	iso_5002	138	72	138	111	22293	38014	219	448	1259	338	1863	1438
chr3	39337661	39340012	iso_5008	138	72	139	112	22509	38399	220	450	1268	342	1918	1449
chr3	39337661	39340012	iso_5006	138	72	139	112	22509	38399	220	450	1268	342	1918	1449
chr3	39337661	39340012	iso_5007	138	72	139	112	22509	38399	220	450	1268	342	1918	1449
chr3	39337661	39340020	iso_5005	138	72	139	112	22509	38399	220	450	1268	342	1918	1449
chr3	39337661	39340020	iso_5003	138	72	139	112	22509	38399	220	450	1268	342	1918	1449
chr3	39337661	39340020	iso_5004	138	72	139	112	22509	38399	220	450	1268	342	1918	1449
chr3	40462398	40468756	iso_5019	42	19	21	51	19	24	25	21	39	16	523	1291
chr3	43396098	43400585	iso_5032	1462	938	1548	1921	520	557	134	247	217	123	689	897
chr3	44870808	44873447	iso_5038	284	166	345	352	725	686	499	312	542	334	732	1122
chr3	44870808	44873566	iso_5039	284	167	346	354	726	688	499	313	542	335	751	1130
chr3	44874127	44881984	iso_5040	1173	884	1252	1573	1365	1199	1675	2202	2776	1705	2323	3865
chr3	44875332	44879306	iso_5041	576	491	655	785	629	640	931	1141	1506	913	1245	2169
chr3	51354923	51358531	iso_5084	89	92	53	100	71	87	167	158	39	35	1348	2801
chr3	51354923	51358531	iso_5085	89	92	53	100	71	87	167	158	39	35	1348	2801
chr3	55463022	55468616	iso_5108	550	501	1012	1519	679	723	1099	2272	636	593	59	68
chr3	59060244	59067269	iso_5137	26	42	36	54	2	3	33	15	10	2	1053	2023
chr3	59060244	59067285	iso_5138	26	42	36	54	2	3	33	15	10	2	1054	2023
chr3	60674295	60677725	iso_5144	1348	769	2111	1829	14	12	8193	2015	206	135	7	37
chr3	62374232	62383377	iso_5149	41	40	70	51	52650	53010	322	1021	435	216	50	76
chr3	62374232	62388703	iso_5151	49	45	80	62	54068	55724	338	1070	447	232	53	87
chr3	62374232	62388703	iso_5150	49	45	80	62	54068	55724	338	1070	447	232	53	87
chr3	62374493	62388703	iso_5148	49	45	80	62	54032	55697	338	1070	447	232	53	87
chr3	62378765	62388462	iso_5153	13	10	22	19	15805	19629	55	124	61	18	9	25
chr3	62378765	62388703	iso_5155	14	10	22	19	15833	19658	56	125	61	18	9	25
chr3	62378765	62388703	iso_5154	14	10	22	19	15833	19658	56	125	61	18	9	25
chr3	62380726	62388703	iso_5152	12	10	17	18	14456	18395	45	105	44	17	8	22
chr3	62472203	62479201	iso_5156	34	18	7	9	35	26	20	21	2	2	7698	5660
chr3	67243001	67243446	iso_5189	24	17	26	46	31	23	17	2	4	3	1	23
chr3	67409009	67411773	iso_5191	275	180	514	517	311	172	548	404	823	204	116	608
chr3	67409009	67413183	iso_5192	285	188	524	535	321	186	574	426	859	223	165	637
chr3	79045828	79046507	iso_5230	11	5	9	4	2	0	8	8	2	0	26	72
chr3	80912222	80915750	iso_9500	14087	9992	19586	17357	8803	7828	52548	60047	55956	38805	32434	39453
chr3	80912222	80919408	iso_8520	19528	14847	26064	25731	11721	10616	66116	78202	70644	50102	41231	51215
chr3	80913081	80919408	iso_5236	19485	14829	26056	25701	11718	10610	66084	78192	70642	50058	41068	51131
chr3	80914615	80919408	iso_5237	14637	11262	19085	19395	8980	7958	46911	56608	46257	36716	28622	32564
chr3	87829502	87838049	iso_9045	666	562	1537	1892	54	39	397	364	4471	2539	89	215
chr3	95754412	95761202	iso_9067	463	387	866	1047	386	238	378	323	399	110	170	405
chr3	95754412	95761386	iso_8606	466	389	866	1052	388	239	380	323	399	111	170	406
chr3	95780288	95783901	iso_5314	161	129	334	312	141	182	441	366	150	103	763	818
chr3	95780288	95783901	iso_5312	161	129	334	312	141	182	441	366	150	103	763	818
chr3	95780288	95783901	iso_9002	161	129	334	312	141	182	441	366	150	103	763	818
chr3	95780288	95783901	iso_5313	161	129	334	312	141	182	441	366	150	103	763	818
chr3	101036995	101038349	iso_5337	63	31	31	33	55	88	141	81	94	64	355	522
chr3	103877282	103882846	iso_5350	103	48	78	93	77	55	306	121	214	52	391	762
chr3	103877282	103882846	iso_5351	103	48	78	93	77	55	306	121	214	52	391	762
chr3	104103459	104106877	iso_5355	733	323	618	501	609	595	528	591	157	290	1799	512
chr3	104119878	104123223	iso_5356	448	328	438	511	425	480	492	526	329	450	1266	768
chr3	104175321	104177329	iso_5357	265	184	166	178	98	90	237	309	32	101	1334	259
chr3	104239259	104252550	iso_5358	2076	1304	2846	3296	1311	1499	2433	1719	722	961	1184	1115
chr3	104269919	104280480	iso_5359	1020	947	1773	3395	84	113	199	218	359	51	1030	1739
chr3	104828736	104835280	iso_5369	11716	10358	13345	20535	2735	9144	1908	1978	1064	1628	23577	16872
chr3	106803685	106815184	iso_5384	477	443	1412	1783	1141	809	220	430	17539	6985	1064	1969
chr3	106997127	107007388	iso_5387	6571	5527	6872	8661	6458	7777	10954	8029	16141	15584	2235	4519
chr3	107119232	107128056	iso_5389	101	67	116	176	303	199	450	503	456	217	546	653
chr3	108472535	108475004	iso_5393	133	88	178	165	72	75	201	184	300	169	389	739
chr3	109419645	109423018	iso_5402	71	51	159	176	155	112	153	114	3950	855	38	79
chr4	1164085	1172776	iso_5415	436	330	923	1218	746	761	698	601	578	402	198	382
chr4	1239118	1242343	iso_5417	3545	3008	3491	3199	239	203	498	481	827	900	753	1454
chr4	1245204	1248483	iso_5418	282	177	277	306	482	404	751	845	356	352	358	352
chr4	1543843	1546194	iso_5425	423	270	510	622	332	346	703	551	491	512	1044	1397
chr4	1577121	1578546	iso_5426	59	34	72	84	52	43	110	73	47	42	384	535
chr4	1595660	1600243	iso_5427	562	337	567	561	505	387	767	501	436	342	1985	2616
chr4	1656182	1657757	iso_5430	715	447	1426	1638	359	319	34	50	36	48	24	15
chr4	1659359	1662829	iso_5431	806	453	3010	2259	202	234	30	29	18	38	34	13
chr4	1812703	1815939	iso_5432	49	31	16	34	16	9	22	37	10	12	3723	2532
chr4	1832715	1833390	iso_5433	26	22	14	38	65	119	19	19	7	37	26	12
chr4	1853632	1858009	iso_5435	561	516	746	941	502	613	540	714	385	459	1125	963
chr4	1853632	1858009	iso_5436	561	516	746	941	502	613	540	714	385	459	1125	963
chr4	1863967	1866718	iso_5437	176	130	153	183	199	215	228	264	250	187	986	1118
chr4	1867423	1868548	iso_9338	1324	789	1602	1500	3274	3511	3434	4602	2041	3259	6191	2897
chr4	1867423	1869523	iso_9458	1984	1210	2543	2370	5334	5319	5141	7144	3205	4813	9380	4253
chr4	1867423	1869523	iso_9406	1984	1210	2543	2370	5334	5319	5141	7144	3205	4813	9380	4253
chr4	1867423	1870208	iso_9350	2452	1519	3092	3033	6623	6387	6720	8574	4387	5675	11101	5882
chr4	1867423	1871101	iso_9284	2704	1772	3356	3417	7365	7059	7276	9560	4849	6150	11928	6350
chr4	1867423	1871101	iso_9417	2704	1772	3356	3417	7365	7059	7276	9560	4849	6150	11928	6350
chr4	1867423	1871101	iso_9167	2704	1772	3356	3417	7365	7059	7276	9560	4849	6150	11928	6350
chr4	1867423	1871101	iso_5438	2704	1772	3356	3417	7365	7059	7276	9560	4849	6150	11928	6350
chr4	1867423	1871101	iso_9170	2704	1772	3356	3417	7365	7059	7276	9560	4849	6150	11928	6350
chr4	1867711	1871101	iso_5439	2701	1768	3355	3414	7364	7053	7270	9558	4848	6139	11912	6348
chr4	2148163	2154406	iso_5446	2414	2019	1976	2162	5467	7894	2309	2136	1323	1240	1349	2069
chr4	2247025	2254452	iso_5455	918	651	900	961	601	516	1766	994	1506	586	1255	3815
chr4	2293851	2294352	iso_5458	5	0	13	5	0	0	63	68	66	117	13	3
chr4	2375142	2377453	iso_5460	221	195	112	138	37	13	25	15	3	3	41	44
chr4	3748292	3754394	iso_5477	273	270	230	317	887	734	1479	1119	3356	1037	99	378
chr4	3991727	3996103	iso_5479	250	211	339	470	164	117	222	291	213	79	173	502
chr4	4023363	4025028	iso_5482	7	8	11	24	39	23	85	67	16	10	191	209
chr4	4385505	4398750	iso_8966	1585	1354	2536	2871	1161	838	901	847	846	436	1797	2168
chr4	4385505	4400404	iso_8791	1670	1437	2635	2998	1209	872	963	885	900	449	1930	2545
chr4	4385554	4400417	iso_5492	1670	1437	2635	2998	1209	872	963	885	900	449	1931	2545
chr4	4389612	4400417	iso_5494	1242	1021	1809	1968	824	642	708	643	677	356	1757	2067
chr4	4389612	4400417	iso_5493	1242	1021	1809	1968	824	642	708	643	677	356	1757	2067
chr4	4389666	4400417	iso_5495	1240	1019	1809	1964	822	641	707	643	674	356	1757	2063
chr4	5131293	5137834	iso_5498	713	475	720	931	406	372	612	485	414	352	1171	1257
chr4	13137170	13141324	iso_8792	315	201	242	257	51	61	129	116	91	79	545	593
chr4	13765568	13773839	iso_5542	237	197	238	301	140	130	322	318	216	89	1209	2208
chr4	14132967	14134244	iso_5544	124	119	91	49	7	4	9	4	5	0	22	66
chr4	14155416	14162531	iso_5547	3129	2351	3047	3221	378	331	928	673	541	255	753	1770
chr4	14172819	14184240	iso_5548	894	756	1305	1381	1360	1562	3492	3853	2841	1486	1223	1612
chr4	16383502	16399245	iso_5559	2120	1994	1761	2482	1116	1487	1829	2704	1926	1106	1177	2431
chr4	16444287	16448843	iso_5561	288	191	327	346	211	108	314	211	335	128	322	1110
chr4	16455528	16462771	iso_5563	907	568	1117	1077	942	842	1039	770	1145	518	857	2828
chr4	16521838	16523844	iso_5571	3785	2203	3405	3174	3999	5329	1785	2183	2321	5184	6833	2641
chr4	16521838	16523844	iso_8953	3785	2203	3405	3174	3999	5329	1785	2183	2321	5184	6833	2641
chr4	16521838	16523844	iso_5570	3785	2203	3405	3174	3999	5329	1785	2183	2321	5184	6833	2641
chr4	19777636	19787440	iso_5592	25	18	8	7	64	245	4473	1913	115173	107980	352	858
chr4	28733226	28734982	iso_5624	251	161	239	281	503	568	341	295	330	208	648	848
chr4	28733226	28735276	iso_5625	363	219	266	381	534	641	416	331	375	285	963	952
chr4	29097560	29101400	iso_5629	2398	1844	1707	2111	531	525	1338	1330	333	137	265	611
chr4	29097818	29101400	iso_5630	2395	1843	1703	2108	531	524	1325	1328	332	137	252	611
chr4	30049106	30052301	iso_5638	159	148	236	319	163	209	89	102	84	14	62	173
chr4	32681974	32684784	iso_5656	2470	1988	2863	3106	4850	4137	7630	6439	5723	2877	5487	11443
chr4	33471826	33495323	iso_5662	406	294	1443	1779	48	42	1062	1315	126	36	1179	4568
chr4	34187733	34191754	iso_8529	90	94	203	225	761	1006	5183	4938	207	313	848	739
chr4	34204327	34211189	iso_5671	68	77	98	80	119	113	1271	1615	37	24	273	428
chr4	34488353	34493082	iso_9240	279	329	214	545	99	75	120	146	371	233	129	360
chr4	37109075	37118534	iso_5680	228	141	36	51	18	24	1621	1554	1170	541	0	2
chr4	38931669	38934178	iso_5702	18	14	23	31	18	4	46	48	66	14	143	474
chr4	39280072	39281653	iso_5710	114	75	131	141	79	57	175	105	83	63	328	337
chr4	42741337	42743147	iso_5719	146	64	144	163	191	78	231	81	67	14	1027	3386
chr4	45788797	45797400	iso_8270	5090	3682	2574	2468	55	49	215	156	69	57	5495	6973
chr4	45820557	45824912	iso_5743	2255	1641	3809	3764	2483	1733	3413	2669	2723	1502	1110	2216
chr4	45820557	45834281	iso_5744	2877	2115	4651	4743	3143	2237	4319	3277	3219	1753	1999	4381
chr4	45882192	45884181	iso_9375	71	51	83	94	51	54	133	64	180	42	73	350
chr4	45882192	45884209	iso_8267	72	52	84	94	52	54	135	66	181	43	73	352
chr4	46410690	46417329	iso_5747	1325	906	2288	1885	507	432	444	332	75	21	633	1004
chr4	46410690	46422960	iso_5748	1939	1283	3368	2694	691	586	601	442	90	33	932	1425
chr4	46410690	46425591	iso_5749	1962	1295	3394	2734	702	599	616	453	93	34	981	1505
chr4	48654689	48659248	iso_5765	328	280	426	446	237	204	202	208	134	60	844	1552
chr4	49057669	49071284	iso_5772	5511	2960	8913	8592	6104	6598	5971	6499	1967	1976	9172	8505
chr4	51210766	51212399	iso_5788	360	289	316	364	196	205	875	1339	630	1176	290	230
chr4	51211140	51213107	iso_5789	283	234	250	301	148	158	704	1023	541	897	233	228
chr4	51213867	51215568	iso_5790	114	86	48	86	82	110	1661	1304	1428	1633	799	4962
chr4	53952127	53955744	iso_5796	39	44	38	47	17	19	56	64	43	18	548	580
chr4	53955365	53959687	iso_5798	374	314	393	531	324	303	479	521	637	362	596	1285
chr4	53956194	53959687	iso_5799	371	308	389	525	321	301	479	520	634	361	584	1259
chr4	53956194	53959886	iso_5800	377	310	393	529	323	306	491	525	635	368	600	1261
chr4	54138898	54140080	iso_5801	231	284	194	307	428	609	298	523	378	348	350	445
chr4	54473615	54475616	iso_5804	75	66	63	85	23	35	42	59	55	29	177	297
chr4	56331748	56343898	iso_5811	5048	3914	5333	6004	1420	1503	39	74	4	5	117	361
chr4	57596753	57600693	iso_5817	628	381	1198	1197	86	93	856	1191	31477	12583	148	391
chr4	59556237	59561939	iso_9052	469	369	598	656	604	610	2825	2064	4538	2847	411	778
chr4	59556237	59563564	iso_5826	496	403	641	704	635	667	2994	2294	4817	3143	445	848
chr4	59556237	59563564	iso_5827	496	403	641	704	635	667	2994	2294	4817	3143	445	848
chr4	59556237	59563882	iso_8777	500	407	649	708	638	671	3002	2300	4832	3193	456	850
chr4	59556237	59563882	iso_9088	500	407	649	708	638	671	3002	2300	4832	3193	456	850
chr4	59556237	59563882	iso_8252	500	407	649	708	638	671	3002	2300	4832	3193	456	850
chr4	59556237	59563882	iso_8297	500	407	649	708	638	671	3002	2300	4832	3193	456	850
chr4	59557344	59563564	iso_5828	442	358	577	625	553	617	2841	2061	4403	2961	418	793
chr4	59581319	59589160	iso_5830	4	0	4	1	11	13	1163	2414	5034	7669	491	597
chr4	59581319	59601820	iso_5831	6	4	7	5	58	66	8498	11677	49422	25018	1115	1920
chr4	59600059	59604485	iso_5832	2	1	2	3	14	16	2070	2994	11206	5676	257	522
chr4	59600061	59604485	iso_5833	2	1	2	3	14	16	2070	2994	11206	5676	257	522
chr4	59764330	59766646	iso_5836	557	582	330	505	207	357	400	458	390	357	2812	5032
chr4	60705380	60724941	iso_5848	1079	711	399	402	4732	5366	986	1068	638	188	200	406
chr4	60705380	60730513	iso_5849	1200	798	433	443	4845	5473	1013	1093	661	193	223	458
chr4	62744704	62746559	iso_5868	29	32	39	70	74	71	36	56	62	20	68	230
chr4	62769104	62769887	iso_5869	24	16	31	46	14	6	29	17	33	8	48	208
chr4	64342646	64350054	iso_8894	434	334	408	418	179	203	267	409	20941	16452	573	667
chr4	65754724	65755725	iso_5883	2	3	4	7	1	2	6	4	6	0	243	433
chr4	65758184	65760720	iso_5884	15	11	16	20	4	8	16	18	12	4	1300	2103
chr4	65771810	65777578	iso_5886	1234	970	802	846	932	1105	497	534	236	120	849	1051
chr4	68758473	68762841	iso_5911	127	120	171	212	136	79	278	133	216	28	143	1047
chr4	68898662	68899387	iso_9425	432	257	392	550	595	676	519	783	453	587	585	312
chr4	76139344	76144433	iso_5947	156	137	498	711	4	3	216	224	12	7	67	255
chr4	85059265	85060948	iso_5998	172	143	128	205	168	228	254	161	301	244	599	548
chr4	85059265	85060948	iso_5997	172	143	128	205	168	228	254	161	301	244	599	548
chr4	85197750	85202299	iso_6001	414	281	684	664	319	324	579	418	393	143	272	765
chr4	85515532	85523297	iso_6007	142	131	186	192	370	373	2909	3135	1792	1362	891	1004
chr4	85515532	85523297	iso_6005	142	131	186	192	370	373	2909	3135	1792	1362	891	1004
chr4	85515532	85523297	iso_6006	142	131	186	192	370	373	2909	3135	1792	1362	891	1004
chr4	88167933	88171223	iso_6012	670	468	588	672	1070	1165	927	934	859	820	1342	1748
chr4	88569889	88578013	iso_6017	5	3	3	16	770	392	0	2	0	0	9	8
chr4	89215320	89218739	iso_6021	977	759	744	812	635	729	965	1296	801	917	4380	3409
chr4	90202908	90211748	iso_6026	843	542	1366	1690	615	1232	2034	2542	81	150	248	118
chr5	21706	26726	iso_6033	429	397	498	673	162	148	957	969	528	187	157	442
chr5	53427	71637	iso_6034	7938	5304	7119	7119	379	227	267	217	97	57	1047	1307
chr5	80212	81320	iso_6035	507	279	283	333	37	59	31	45	9	31	2830	746
chr5	96612	99362	iso_8851	373	277	359	426	619	762	1276	1113	1129	1535	520	370
chr5	104710	112110	iso_6037	2052	1591	3327	4445	1394	1350	2338	1622	1603	1142	1356	2464
chr5	104710	112110	iso_6036	2052	1591	3327	4445	1394	1350	2338	1622	1603	1142	1356	2464
chr5	142373	145593	iso_6038	91	64	231	271	360	903	57	52	12	18	27	19
chr5	153779	159244	iso_6039	440	222	701	724	872	1755	83	112	42	58	133	127
chr5	178048	179323	iso_6040	65	77	108	105	81	59	283	287	174	326	377	226
chr5	199438	201194	iso_6041	1364	653	1017	1020	4181	5500	1765	1840	1696	3974	3554	1346
chr5	199438	201194	iso_6042	1364	653	1017	1020	4181	5500	1765	1840	1696	3974	3554	1346
chr5	247961	249901	iso_6043	363	205	327	383	566	669	982	510	574	667	586	934
chr5	253354	261918	iso_6044	640	371	888	964	141	150	1351	1630	1291	2009	1157	738
chr5	377348	384295	iso_6048	3146	1741	3811	4010	18	17	170	98	8	11	181	116
chr5	401584	403940	iso_6052	169	132	78	101	54	67	184	195	105	123	2073	1498
chr5	409269	409683	iso_6053	32	14	16	44	4	15	254	150	458	924	110	37
chr5	412898	426920	iso_6054	1635	1181	1763	1944	1042	1051	1715	1700	1480	1095	3348	3633
chr5	462149	465450	iso_6055	1011	640	896	898	771	682	943	880	706	634	1361	1054
chr5	474506	476352	iso_8679	182	137	95	146	109	81	387	153	214	142	94	284
chr5	476600	478235	iso_6056	48	32	35	54	85	46	86	66	1123	2037	234	237
chr5	480515	482302	iso_6057	195	142	439	426	56	29	116	160	28	96	127	96
chr5	489949	491025	iso_6059	316	181	195	267	360	490	458	417	352	488	471	347
chr5	503067	505898	iso_6060	1016	616	982	1157	1003	1254	1555	1436	1338	1948	2746	1922
chr5	792339	794352	iso_6067	5	5	16	13	1	0	7	5	3	2	184	783
chr5	1572889	1585568	iso_6073	2359	1549	1039	1295	25	12	31	30	19	23	444	488
chr5	1626151	1630470	iso_6074	287	213	247	274	282	250	684	406	903	658	658	1026
chr5	1673628	1680401	iso_8247	444	264	234	180	46	22	104	62	270	422	484	1240
chr5	1710082	1719082	iso_6077	15	18	17	30	32	11	29	21	18	12	1756	3315
chr5	8199533	8207087	iso_6112	7348	6048	6721	9253	5292	5683	6049	7752	6006	2471	7599	18952
chr5	8199769	8207087	iso_6114	7029	5821	6457	8874	5153	5546	5823	7529	5724	2400	7436	18447
chr5	8199769	8207087	iso_6115	7029	5821	6457	8874	5153	5546	5823	7529	5724	2400	7436	18447
chr5	8199769	8207087	iso_6113	7029	5821	6457	8874	5153	5546	5823	7529	5724	2400	7436	18447
chr5	8200367	8205311	iso_6116	4907	4183	4530	6380	4043	4330	4284	6102	4579	2045	5005	11978
chr5	8200367	8207087	iso_6117	6478	5469	5880	8287	4827	5212	5147	6978	5029	2210	6865	16736
chr5	8201196	8207087	iso_6118	6167	5218	5503	7776	4636	5047	4962	6799	4861	2161	6727	15987
chr5	8755031	8762361	iso_6124	100	76	39	74	30	38	57	87	19	11	3033	7286
chr5	11936785	11942694	iso_6148	1407	1112	770	947	268	186	1978	1718	6221	6833	6499	8110
chr5	12438801	12446708	iso_6154	31	31	28	56	108	272	333	485	285	205	458	865
chr5	12446641	12448804	iso_6155	20	8	11	22	55	128	140	192	129	55	99	380
chr5	13554245	13564377	iso_6168	877	485	898	1126	497	1542	138	172	17	121	80	46
chr5	15504206	15524571	iso_6182	2151	2011	2586	2770	479	796	1905	2156	598	178	1434	3009
chr5	16149671	16154263	iso_6186	11650	7808	8320	7871	49270	53952	56896	51444	67898	74482	5084	5952
chr5	16246242	16247659	iso_6187	72	63	90	104	224	206	328	265	362	166	89	213
chr5	16303610	16306772	iso_6189	417	471	388	762	976	768	18212	9657	37659	59902	1643	1423
chr5	16308692	16310040	iso_6190	24	6	33	36	345	334	27	19	6	25	109	64
chr5	16342959	16346178	iso_6192	203	98	98	188	59	60	168	131	50	49	992	850
chr5	22147722	22154305	iso_6211	408	280	740	918	195	112	144	155	164	58	175	500
chr5	22178978	22181783	iso_6212	908	838	870	1092	904	1033	859	954	1162	627	1042	1927
chr5	22313696	22339281	iso_6221	4	3	3	2	30798	34322	3	15	3	0	11	26
chr5	22323054	22339281	iso_6222	3	3	0	1	26018	27250	3	11	1	0	10	18
chr5	22327184	22339281	iso_6223	3	2	0	1	24189	25281	3	10	1	0	10	15
chr5	22327184	22339281	iso_6225	3	2	0	1	24189	25281	3	10	1	0	10	15
chr5	22327184	22339281	iso_6224	3	2	0	1	24189	25281	3	10	1	0	10	15
chr5	22328178	22338702	iso_6226	3	2	0	1	21846	23322	3	10	1	0	7	12
chr5	22345325	22351218	iso_6227	1088	846	1531	1811	130	98	144	150	152	70	98	350
chr5	22730788	22733620	iso_6235	387	274	459	428	90	56	98	92	70	21	481	1339
chr5	22947410	22949452	iso_6242	834	505	440	448	18	25	249	86	97	164	266	358
chr5	22947410	22949452	iso_6241	834	505	440	448	18	25	249	86	97	164	266	358
chr5	22947410	22949452	iso_6243	834	505	440	448	18	25	249	86	97	164	266	358
chr5	23231863	23232993	iso_6247	335	145	240	324	3	5	44	37	3	8	13	16
chr5	27152521	27156499	iso_6288	2186	1758	2023	2876	1223	1892	2268	1658	2198	1277	575	977
chr5	27153037	27155974	iso_6289	1617	1287	1542	2127	884	1385	1728	1166	1605	889	331	746
chr5	27153633	27155974	iso_6290	1424	1149	1313	1792	744	1257	1449	1044	1331	822	306	527
chr5	28218398	28222064	iso_6305	4	21	2	9	26	24	16	28	16	8	497	1433
chr5	28218398	28222064	iso_8384	4	21	2	9	26	24	16	28	16	8	497	1433
chr5	31546924	31551790	iso_6322	6	13	19	4	155182	224733	12	105	1	11	102	27
chr5	31546924	31551790	iso_6321	6	13	19	4	155182	224733	12	105	1	11	102	27
chr5	31546924	31552937	iso_9078	6	13	19	4	155185	224733	12	105	1	11	102	27
chr5	31546924	31552937	iso_6327	6	13	19	4	155185	224733	12	105	1	11	102	27
chr5	31546924	31552937	iso_6326	6	13	19	4	155185	224733	12	105	1	11	102	27
chr5	31546924	31552937	iso_6324	6	13	19	4	155185	224733	12	105	1	11	102	27
chr5	31546924	31552937	iso_6323	6	13	19	4	155185	224733	12	105	1	11	102	27
chr5	31546924	31552937	iso_6328	6	13	19	4	155185	224733	12	105	1	11	102	27
chr5	31546924	31552937	iso_6325	6	13	19	4	155185	224733	12	105	1	11	102	27
chr5	31546977	31552937	iso_6329	6	13	19	4	155185	224727	12	105	1	11	102	27
chr5	31547713	31551790	iso_6331	4	13	19	4	146223	191202	11	94	1	11	78	24
chr5	31547713	31551790	iso_6330	4	13	19	4	146223	191202	11	94	1	11	78	24
chr5	31547713	31552937	iso_6332	4	13	19	4	146226	191202	11	94	1	11	78	24
chr5	36977911	36978256	iso_6375	20	19	15	20	6	6	15	5	5	4	100	23
chr5	37005738	37010993	iso_6376	25	26	24	29	13	13	86	121	59	22	309	2419
chr5	37134599	37142609	iso_8873	134	118	195	174	1532	962	711	576	793	457	386	514
chr5	37134599	37142609	iso_8359	134	118	195	174	1532	962	711	576	793	457	386	514
chr5	37389789	37391172	iso_6384	1050	620	377	505	13	19	42	25	20	17	30	22
chr5	37607283	37608972	iso_6387	516	348	298	368	157	161	255	322	1067	1454	257	313
chr5	38392790	38413116	iso_6392	3154	2155	3817	4196	99	103	103	126	22	105	3150	4238
chr5	38632378	38635401	iso_6400	344	296	358	448	511	531	803	395	581	325	1489	2085
chr5	38632378	38635401	iso_6401	344	296	358	448	511	531	803	395	581	325	1489	2085
chr5	38632378	38635401	iso_6399	344	296	358	448	511	531	803	395	581	325	1489	2085
chr5	38632378	38635401	iso_6402	344	296	358	448	511	531	803	395	581	325	1489	2085
chr5	43844823	43847241	iso_6430	705	627	394	589	2812	3040	1091	957	1369	778	2558	5263
chr5	43844823	43847241	iso_6429	705	627	394	589	2812	3040	1091	957	1369	778	2558	5263
chr5	43844823	43847258	iso_6434	705	627	394	589	2812	3040	1091	957	1369	778	2597	5301
chr5	43844823	43847292	iso_6433	705	627	394	589	2812	3040	1091	957	1369	778	2625	5329
chr5	43844823	43847297	iso_6432	705	627	394	589	2812	3040	1091	957	1369	778	2631	5329
chr5	43844823	43847297	iso_6431	705	627	394	589	2812	3040	1091	957	1369	778	2631	5329
chr5	49389939	49394045	iso_6459	14734	11465	18461	21681	9525	11914	12255	21327	24934	16013	11538	39051
chr5	50118766	50121769	iso_9313	1502	1055	1781	2125	747	859	885	1083	1265	1098	2019	3138
chr5	50118766	50122175	iso_9355	1687	1287	2022	2411	883	1005	1047	1298	1715	1320	2287	3681
chr5	50118766	50123453	iso_9323	2284	1738	2990	3420	1295	1312	1514	1736	2504	1559	2809	5039
chr5	50118766	50123466	iso_9422	2284	1739	2990	3421	1296	1312	1516	1737	2505	1560	2809	5039
chr5	50118766	50123466	iso_9064	2284	1739	2990	3421	1296	1312	1516	1737	2505	1560	2809	5039
chr5	50118766	50124118	iso_9347	2734	2019	3516	4041	1604	1468	1890	1966	3312	1754	3119	6818
chr5	50118766	50124118	iso_9493	2734	2019	3516	4041	1604	1468	1890	1966	3312	1754	3119	6818
chr5	50118766	50124465	iso_9366	3050	2323	3950	4538	1882	1671	2261	2299	4134	2004	3469	8250
chr5	50118766	50125264	iso_9349	3449	2703	4404	5129	2147	1911	2560	2612	5035	2236	3734	9728
chr5	50118766	50126127	iso_9296	4100	3351	5272	6285	2748	2706	3079	3810	6229	3186	4968	11654
chr5	50118766	50126127	iso_9407	4100	3351	5272	6285	2748	2706	3079	3810	6229	3186	4968	11654
chr5	50118766	50126127	iso_8322	4100	3351	5272	6285	2748	2706	3079	3810	6229	3186	4968	11654
chr5	50118766	50126127	iso_9334	4100	3351	5272	6285	2748	2706	3079	3810	6229	3186	4968	11654
chr5	50118766	50126127	iso_9419	4100	3351	5272	6285	2748	2706	3079	3810	6229	3186	4968	11654
chr5	50118766	50126127	iso_9474	4100	3351	5272	6285	2748	2706	3079	3810	6229	3186	4968	11654
chr5	50118766	50126127	iso_8239	4100	3351	5272	6285	2748	2706	3079	3810	6229	3186	4968	11654
chr5	50118766	50126127	iso_9324	4100	3351	5272	6285	2748	2706	3079	3810	6229	3186	4968	11654
chr5	50118917	50122175	iso_6469	1687	1287	2020	2410	882	1004	1040	1297	1712	1319	2266	3616
chr5	50119008	50126127	iso_9421	4091	3337	5247	6270	2743	2680	3045	3796	6177	3145	4866	10982
chr5	50119759	50126127	iso_6470	3395	2919	4552	5402	2501	2363	2669	3409	5779	2695	3943	9708
chr5	50222692	50230404	iso_6476	16082	10597	20096	17905	30905	28377	3957	5970	188	107	50841	65691
chr5	50222692	50230404	iso_6474	16082	10597	20096	17905	30905	28377	3957	5970	188	107	50841	65691
chr5	50222692	50230404	iso_6477	16082	10597	20096	17905	30905	28377	3957	5970	188	107	50841	65691
chr5	50222692	50230404	iso_6475	16082	10597	20096	17905	30905	28377	3957	5970	188	107	50841	65691
chr5	50222692	50230404	iso_6473	16082	10597	20096	17905	30905	28377	3957	5970	188	107	50841	65691
chr5	51859168	51864700	iso_6503	115	108	169	196	225	222	341	269	191	73	1480	2865
chr5	57993432	57993949	iso_6555	2	5	4	10	64	85	56	26	26	77	44	8
chr5	57995124	57995551	iso_6556	4	3	3	6	116	127	31	69	23	97	79	11
chr5	58683590	58684614	iso_6564	349	177	228	283	614	870	2134	583	624	484	815	2229
chr5	58707473	58721865	iso_6567	327	294	441	479	355	270	2099	2028	922	679	1061	1774
chr6	2249009	2257784	iso_6580	1746	1567	1257	1596	1140	1013	2599	3760	2405	1914	2177	4388
chr6	2249594	2257784	iso_6581	1739	1563	1255	1589	1139	1007	2594	3756	2402	1902	2090	4360
chr6	4677985	4691682	iso_6587	628	422	794	714	291	181	863	443	672	296	1349	2218
chr6	7692614	7708941	iso_6597	180	114	60	73	137	18	97	125	95	32	1150	2211
chr6	8477446	8520483	iso_6602	4407	3234	7008	7491	4462	4601	2436	1457	1162	312	403	1506
chr6	8499621	8520483	iso_6604	1568	1137	2297	2574	3973	4156	2072	1215	982	278	326	1298
chr6	8505149	8520483	iso_6605	1088	808	1478	1847	2453	2554	1066	671	530	122	114	563
chr6	8911195	8912851	iso_6608	420	246	441	507	2396	1869	7516	6938	2509	3037	325	254
chr6	8915403	8918093	iso_6610	1632	1187	808	965	870	1242	1186	1691	685	1676	1214	499
chr6	8915403	8918093	iso_6609	1632	1187	808	965	870	1242	1186	1691	685	1676	1214	499
chr6	8915403	8918093	iso_6611	1632	1187	808	965	870	1242	1186	1691	685	1676	1214	499
chr6	9153082	9155985	iso_6613	29	29	84	96	14	16	159	261	798	1827	56	53
chr6	10167004	10172678	iso_8840	1333	1015	2149	2218	1577	1653	3573	2629	2780	1182	2729	8724
chr6	10167261	10172671	iso_8471	1332	1013	2148	2216	1577	1649	3567	2627	2777	1176	2714	8717
chr6	10167261	10172671	iso_6616	1332	1013	2148	2216	1577	1649	3567	2627	2777	1176	2714	8717
chr6	10167261	10172678	iso_9146	1332	1013	2148	2216	1577	1649	3567	2627	2777	1176	2714	8717
chr6	10214222	10214734	iso_6618	0	0	0	0	0	0	0	0	0	0	44	64
chr6	10627393	10635769	iso_6622	45	43	867	1112	3	15	74	56	38	21	3	8
chr6	11067736	11068711	iso_6630	2858	1933	1552	2795	57	59	141	118	13	52	66	32
chr6	11094074	11095199	iso_6632	195	136	103	149	224	325	331	176	289	197	79	125
chr6	14410223	14421098	iso_6649	3071	2494	3110	3873	7255	8062	2091	2335	2646	1402	4729	8548
chr6	14410223	14421098	iso_8300	3071	2494	3110	3873	7255	8062	2091	2335	2646	1402	4729	8548
chr6	15502532	15506785	iso_6660	296	279	383	388	246	206	572	689	1233	630	649	1230
chr6	15983108	15993117	iso_6671	1186	866	296	259	5311	3550	699	753	407	186	195	329
chr6	15983325	15998219	iso_6672	2546	1895	696	704	11502	7119	1622	1714	1078	531	486	1215
chr6	15993875	15998219	iso_6673	1399	1029	434	457	6178	3462	947	982	684	349	311	922
chr6	16027285	16037334	iso_6676	595	514	73	75	1670	1437	284	480	291	223	188	214
chr6	16471562	16477702	iso_6680	909	680	1333	1193	510	417	837	1057	1013	727	1472	1616
chr6	16487371	16490594	iso_9038	108	62	126	157	176	278	533	422	105	193	99	59
chr6	21951485	21951924	iso_6719	111	122	33	48	7	6	4	4	0	0	6	13
chr6	21952044	21952904	iso_6720	134	121	29	42	3	4	1	2	0	0	10	31
chr6	21952970	21953530	iso_6721	212	216	70	69	10	9	10	12	0	0	48	72
chr6	21953608	21956365	iso_6722	339	290	64	93	7	16	8	10	0	0	25	86
chr6	21957692	21958225	iso_6723	144	120	25	46	3	4	7	3	0	1	25	101
chr6	21958269	21958803	iso_6724	246	208	39	77	3	20	4	10	0	1	39	102
chr6	21958785	21959164	iso_6725	271	264	60	90	5	17	6	10	0	0	36	154
chr6	22628324	22629027	iso_6732	40	33	76	109	11	4	226	158	100	126	23	10
chr6	23143489	23148450	iso_6740	1012	827	901	1085	2042	2159	1057	896	1203	609	934	1892
chr6	23143489	23148500	iso_6742	1012	827	902	1086	2042	2162	1057	896	1203	610	967	1918
chr6	23143489	23148500	iso_6741	1012	827	902	1086	2042	2162	1057	896	1203	610	967	1918
chr6	23143489	23148500	iso_6745	1012	827	902	1086	2042	2162	1057	896	1203	610	967	1918
chr6	23143489	23148500	iso_6743	1012	827	902	1086	2042	2162	1057	896	1203	610	967	1918
chr6	23143489	23148500	iso_6744	1012	827	902	1086	2042	2162	1057	896	1203	610	967	1918
chr6	25549820	25554805	iso_6753	475	316	701	678	325	193	530	327	515	153	689	2530
chr6	25694165	25696923	iso_6757	282	186	271	321	245	152	951	848	330	230	1202	3036
chr6	27364125	27369065	iso_6766	145	86	1447	1693	339	269	192	114	139	47	136	404
chr6	28515598	28520566	iso_6775	142	131	52	77	5	2	10	14	225	70	433	866
chr6	28516225	28520566	iso_6776	141	131	52	76	5	2	10	14	225	70	427	846
chr6	29508735	29513579	iso_8595	1929	1225	1589	1819	1944	1834	3151	1507	2359	954	945	2248
chr6	29560386	29565617	iso_6784	1410	997	1198	1614	3846	3916	1507	1413	1654	1563	538	664
chr6	29560386	29565697	iso_6786	1414	1000	1199	1614	3850	3932	1515	1413	1655	1571	551	667
chr6	29560386	29565697	iso_8996	1414	1000	1199	1614	3850	3932	1515	1413	1655	1571	551	667
chr6	29560386	29565697	iso_6787	1414	1000	1199	1614	3850	3932	1515	1413	1655	1571	551	667
chr6	29560386	29565697	iso_6785	1414	1000	1199	1614	3850	3932	1515	1413	1655	1571	551	667
chr6	30949857	30952177	iso_6804	41	41	41	38	27	29	126	124	48	21	1696	1770
chr6	30953719	30960428	iso_6805	450	335	512	606	232	261	327	498	236	112	875	1940
chr6	34838151	34838883	iso_6827	58	46	74	91	26	13	36	36	41	14	22	65
chr7	560984	564307	iso_6837	44	49	36	57	1141	675	239	502	422	235	619	1612
chr7	6681442	6683576	iso_6869	442	336	383	383	482	618	1633	2359	1491	1684	337	219
chr7	6849400	6856552	iso_6871	449	394	636	757	404	293	540	591	629	247	1268	2904
chr7	9512979	9514956	iso_6884	10	10	4	5	12	3	23	23	11	1	52	156
chr7	9683764	9689522	iso_6888	1117	982	1402	1669	1036	823	1624	1433	1322	555	892	2349
chr7	9683764	9697294	iso_6889	2587	2121	3508	3762	2148	1769	3563	3326	2678	1217	2311	4293
chr7	9697270	9698306	iso_6890	128	98	155	191	49	47	144	60	110	21	26	106
chr7	9719152	9729837	iso_6891	1998	1459	2354	2838	4180	4489	14268	9034	10436	5168	1414	4496
chr7	10797722	10804949	iso_6900	531	385	888	1054	744	587	1049	775	708	540	2076	3219
chr7	12071305	12076683	iso_6924	1407	1162	1132	1787	3276	2827	4985	3254	4933	1942	585	1731
chr7	14676769	14698151	iso_6948	2	7	4	6	10346	8395	5	8	28	5	70	38
chr7	14684831	14687124	iso_6949	0	0	0	2	1209	1070	0	0	5	2	20	7
chr7	14725979	14735405	iso_6950	0	0	4	1	2140	600	1	0	6	0	0	0
chr7	14725979	14740133	iso_8677	0	2	4	1	2801	782	1	1	7	0	1	0
chr7	14726440	14734270	iso_6951	0	0	2	1	1767	517	1	0	5	0	0	0
chr7	14726440	14740133	iso_9270	0	2	2	1	2769	760	1	1	7	0	1	0
chr7	14727275	14740133	iso_8317	0	2	1	1	2722	746	1	1	7	0	1	0
chr7	14728456	14734751	iso_8937	0	0	1	0	1886	512	1	0	5	0	0	0
chr7	14728456	14740133	iso_9206	0	2	1	0	2618	705	1	1	6	0	1	0
chr7	14728586	14735405	iso_8575	0	0	1	0	1916	508	1	0	5	0	0	0
chr7	14732578	14738866	iso_6952	0	2	0	0	1105	263	0	1	1	0	1	0
chr7	14789373	14797555	iso_6957	0	1	0	3	2252	1214	0	1	9	0	0	2
chr7	14789768	14792405	iso_6958	0	1	0	1	620	321	0	0	2	0	0	1
chr7	14802114	14804679	iso_6959	0	1	0	2	953	550	0	0	3	0	0	1
chr7	14810059	14816192	iso_6960	0	0	3	1	1768	989	0	1	2	1	2	2
chr7	14812923	14816192	iso_6961	0	0	1	0	976	582	0	1	1	1	0	0
chr7	14814391	14817965	iso_6962	0	0	1	0	1120	597	0	1	4	0	0	1
chr7	14822901	14825234	iso_6963	0	0	0	0	706	432	1	1	5	0	0	1
chr7	14830060	14835791	iso_6964	0	0	1	0	844	530	0	0	0	0	1	1
chr7	14853334	14885624	iso_6965	11	23	59	131	59856	64974	18	74	329	14	133	93
chr7	14879449	14885620	iso_6967	5	16	25	64	39782	44287	14	43	183	11	63	62
chr7	14879449	14885620	iso_6968	5	16	25	64	39782	44287	14	43	183	11	63	62
chr7	14879449	14885624	iso_6966	5	16	25	64	39782	44287	14	43	183	11	63	62
chr7	15327781	15331540	iso_8490	1700	1425	2280	2761	1331	1324	4470	2950	3805	1531	975	3475
chr7	15327781	15332723	iso_8901	1846	1520	2427	2943	1416	1463	4969	3220	3948	1748	1147	3799
chr7	17673253	17674479	iso_7005	153	109	185	227	117	145	239	195	199	106	196	463
chr7	18074004	18082773	iso_7006	528	387	482	679	380	230	376	293	378	107	371	1337
chr7	18095767	18100228	iso_7008	63	81	48	43	9	8	17	13	5	4	385	2577
chr7	21514993	21525044	iso_7025	605	547	995	762	56	64	96	64	34	23	2568	6217
chr7	21559183	21560371	iso_7027	0	0	1	3	139	491	1	0	0	0	18	3
chr7	21560622	21561312	iso_7028	1	1	2	3	164	434	0	0	0	0	16	3
chr7	21564797	21565601	iso_7029	3	0	5	1	246	793	0	0	0	0	22	7
chr7	21565644	21567541	iso_7030	3	1	6	1	493	1389	1	0	0	0	29	22
chr7	21638610	21642939	iso_7032	569	330	827	954	3029	4673	41	58	19	36	54	25
chr7	21652423	21668636	iso_7033	1351	688	1001	1389	1722	2612	166	94	36	58	112	170
chr7	21655421	21657765	iso_7034	346	174	271	340	241	234	5	2	2	0	10	10
chr7	21669334	21670016	iso_7035	233	95	161	199	110	157	5	0	1	0	4	5
chr7	21670002	21673443	iso_7036	232	137	125	178	6584	13095	598	932	303	493	497	423
chr7	21679722	21682787	iso_7037	570	375	571	547	458	456	521	581	193	260	733	322
chr7	21721804	21730021	iso_7039	2888	1984	2431	2555	771	825	1095	1229	1269	2094	1773	1147
chr7	21752173	21757655	iso_7041	288	240	399	384	1082	1467	1680	1605	3609	2527	1220	1573
chr7	21972978	21974659	iso_7043	119	80	169	113	39	48	98	97	47	50	198	195
chr7	21980709	21988433	iso_8809	437	289	295	287	579	709	2436	1952	60	81	70	64
chr7	21980709	21988433	iso_7044	437	289	295	287	579	709	2436	1952	60	81	70	64
chr7	21989346	22000961	iso_8430	853	732	713	832	427	455	2319	1543	559	520	4837	5630
chr7	22057586	22059695	iso_7046	186	104	88	92	43	31	212	178	128	181	866	454
chr7	22129741	22141339	iso_7048	549	349	665	764	4774	6473	1569	1588	258	471	552	318
chr7	22141506	22147151	iso_7049	729	418	796	990	10185	10954	3040	3092	470	723	637	716
chr7	26647127	26657772	iso_7067	687	552	791	801	260	206	503	474	1391	940	2443	7321
chr7	26647127	26657772	iso_7068	687	552	791	801	260	206	503	474	1391	940	2443	7321
chr7	26880503	26885458	iso_7069	51	58	113	124	25	27	37	67	46	33	270	550
chr7	26880503	26885458	iso_7070	51	58	113	124	25	27	37	67	46	33	270	550
chr7	27471135	27472311	iso_7076	126	57	97	121	108	119	30	65	9	11	10	9
chr7	27772628	27777798	iso_7077	286	178	367	404	189	108	500	235	381	105	611	1802
chr7	27772628	27777803	iso_7078	286	178	367	404	189	108	500	235	381	105	614	1803
chr7	27777782	27784444	iso_7079	117	74	177	286	59	43	100	63	223	48	476	1770
chr7	27777782	27787939	iso_9279	180	122	293	483	81	56	126	104	292	67	588	2202
chr7	27777782	27787939	iso_7080	180	122	293	483	81	56	126	104	292	67	588	2202
chr7	30125574	30129668	iso_7095	1134	810	716	772	400	394	472	451	413	167	720	1513
chr7	34598556	34603118	iso_7112	50	65	55	87	62	29	89	48	93	34	586	1657
chr7	34598556	34603420	iso_7113	53	66	57	87	64	29	93	49	95	37	666	1736
chr8	1319983	1327541	iso_7139	370	330	611	920	207	147	349	370	417	132	385	1027
chr8	3803214	3806157	iso_9152	355	240	304	348	388	382	314	427	644	1310	401	403
chr8	3803746	3807350	iso_7164	410	263	333	375	414	410	335	446	639	1448	471	378
chr8	3822857	3829790	iso_7165	4260	2377	628	613	2647	5359	731	690	261	449	7491	4626
chr8	4244729	4248656	iso_7172	601	348	646	816	634	416	229	186	185	241	549	506
chr8	4267347	4268880	iso_7173	920	847	1062	1243	5056	6522	12	14	11	8	265	125
chr8	4278443	4283265	iso_7174	54	42	62	54	44	65	1559	3621	9534	9341	234	188
chr8	4296028	4303002	iso_8911	3994	2406	4947	4388	2464	2682	6729	9543	7449	7704	5694	4056
chr8	4688282	4691835	iso_7181	284	177	177	217	130	101	143	138	78	77	1745	2099
chr8	4688282	4691835	iso_7180	284	177	177	217	130	101	143	138	78	77	1745	2099
chr8	4796285	4798482	iso_7186	11	1	2	2	92	97	12190	10220	39626	15487	17	42
chr8	5454741	5460416	iso_9275	600	480	219	240	2034	3138	1071	2187	1110	1442	4347	3024
chr8	5454741	5460708	iso_9282	606	487	222	245	2037	3142	1098	2216	1281	1472	4347	3037
chr8	5454802	5458574	iso_7196	345	214	130	120	1145	2028	676	1355	618	1060	3054	1514
chr8	5460438	5467639	iso_9384	863	514	742	673	1080	897	8861	5196	17815	8059	517	1028
chr8	5460438	5468185	iso_8699	952	551	772	727	1110	962	9303	5458	18266	9244	621	1045
chr8	6430769	6440439	iso_7208	430	263	1503	1397	323	266	349	275	102	68	1102	1544
chr8	6440472	6445389	iso_7209	335	228	1051	1138	212	205	216	248	46	68	1657	1186
chr8	6606103	6608369	iso_7210	4	6	17	11	5	7	71	55	245	163	17	19
chr8	7078753	7085878	iso_8248	1146	931	1354	1671	1694	1354	999	954	1295	714	747	1701
chr8	7393572	7397641	iso_7220	534	508	585	823	146	220	311	345	350	94	94	272
chr8	10851466	10856014	iso_7243	290	134	387	492	135	165	160	139	157	155	143	88
chr8	10876972	10883536	iso_7248	88	61	135	154	390	274	129	89	121	53	331	1019
chr8	10876972	10883536	iso_7247	88	61	135	154	390	274	129	89	121	53	331	1019
chr8	10876972	10883536	iso_7249	88	61	135	154	390	274	129	89	121	53	331	1019
chr8	17811095	17816253	iso_7305	655	499	1117	1513	729	706	680	804	543	277	514	1067
chr8	17817088	17842140	iso_8369	360	231	1451	1559	9838	9262	141	125	149	37	265	1769
chr8	17817088	17842140	iso_8696	360	231	1451	1559	9838	9262	141	125	149	37	265	1769
chr8	17817088	17842140	iso_9494	360	231	1451	1559	9838	9262	141	125	149	37	265	1769
chr8	17817088	17842140	iso_8449	360	231	1451	1559	9838	9262	141	125	149	37	265	1769
chr8	17817088	17842140	iso_9415	360	231	1451	1559	9838	9262	141	125	149	37	265	1769
chr8	17817088	17842140	iso_9401	360	231	1451	1559	9838	9262	141	125	149	37	265	1769
chr8	17817088	17842168	iso_9261	360	231	1451	1559	9838	9262	141	125	149	37	266	1771
chr8	17817088	17842168	iso_8361	360	231	1451	1559	9838	9262	141	125	149	37	266	1771
chr8	17817088	17842168	iso_8446	360	231	1451	1559	9838	9262	141	125	149	37	266	1771
chr8	17817088	17842168	iso_9466	360	231	1451	1559	9838	9262	141	125	149	37	266	1771
chr8	18513226	18515084	iso_8783	18	26	4	10	1	2	2	2	0	1	3299	3909
chr8	18515255	18519792	iso_7311	302	231	226	286	259	172	421	218	355	102	495	1427
chr8	18555205	18556848	iso_7312	5	4	6	5	0	0	411	445	379	329	31	30
chr8	18559759	18572779	iso_7313	394	220	320	355	3097	1910	886	992	337	574	488	369
chr8	18572781	18574995	iso_7314	14	8	20	11	120	135	70	105	17	48	187	122
chr8	19645719	19661240	iso_7320	56	39	57	61	26	8	50	45	41	8	6178	17151
chr8	19645719	19661514	iso_7322	58	39	57	63	26	9	51	47	41	8	6565	17251
chr8	19645719	19661514	iso_7321	58	39	57	63	26	9	51	47	41	8	6565	17251
chr8	19666224	19670751	iso_7323	3723	2641	3491	3871	7904	6810	8077	8346	6236	4184	5615	7402
chr8	19666224	19670922	iso_7325	3723	2642	3491	3871	7905	6810	8077	8346	6236	4184	5615	7404
chr8	19666224	19670922	iso_7324	3723	2642	3491	3871	7905	6810	8077	8346	6236	4184	5615	7404
chr8	19666717	19670922	iso_7326	3706	2631	3487	3850	7892	6790	8047	8325	6227	4169	5538	7358
chr8	19816853	19836988	iso_7328	987	801	1007	1139	486	381	912	830	1245	1056	1855	1886
chr8	19837460	19840746	iso_7330	138	69	148	145	199	224	232	149	323	295	526	421
chr8	20075581	20085919	iso_7338	232	180	398	473	332	242	315	173	162	54	538	2524
chr8	20076314	20085924	iso_7340	228	174	392	463	331	234	302	170	157	52	512	2506
chr8	20076314	20085924	iso_7339	228	174	392	463	331	234	302	170	157	52	512	2506
chr8	20082140	20085924	iso_7341	79	68	105	147	161	107	143	106	100	37	211	933
chr8	20086392	20088138	iso_7342	78	78	87	142	45	36	145	78	3	1	393	292
chr8	20498946	20500443	iso_7346	1576	1072	1051	1310	2826	3374	2142	1659	2278	1993	1387	1116
chr8	20498946	20500443	iso_8907	1576	1072	1051	1310	2826	3374	2142	1659	2278	1993	1387	1116
chr8	20524951	20525900	iso_7347	2	1	2	0	4	4	3079	2170	3	2	2	3
chr8	22959139	22969871	iso_7360	1159	841	808	1050	367	265	267	256	271	70	509	1755
chr8	23072315	23074304	iso_7363	315	286	238	327	323	300	167	196	313	125	660	2343
chr8	23297371	23304617	iso_7367	491	411	858	1006	432	281	387	415	1229	770	646	1301
chr8	23429056	23434426	iso_7368	165	111	160	165	379	257	1559	1088	512	178	186	706
chr8	23445950	23447086	iso_7370	282	199	271	305	211	131	1029	602	3928	879	103	457
chr8	23770186	23774820	iso_7374	1	3	0	0	4	4	0	2	0	1	650	809
chr8	24054742	24063752	iso_7378	666	612	967	1243	261	239	232	214	203	118	809	1016
chr8	24054742	24063833	iso_7379	677	620	973	1256	261	242	235	216	205	126	848	1032
chr8	24065395	24068822	iso_7380	189	140	173	195	360	390	244	282	255	166	571	738
chr8	24186141	24189126	iso_7384	388	317	373	416	940	833	826	967	503	255	151	332
chr8	25587585	25607623	iso_7392	702	509	2257	2495	283	231	1500	872	2293	2336	162	237
chr8	26366732	26373437	iso_7397	67	75	72	94	269	186	95	98	728	1141	106	145
chr8	27165460	27166403	iso_7406	14	15	4	15	14	19	21	24	9	13	201	143
chr8	27220939	27226803	iso_7410	518	458	677	897	506	401	1109	1044	937	371	341	705
chr8	27220939	27226803	iso_7409	518	458	677	897	506	401	1109	1044	937	371	341	705
chr8	27220939	27226812	iso_7408	518	458	677	897	506	401	1109	1044	937	371	341	705
chr8	27915118	27927397	iso_9243	1489	1174	2391	2193	1251	772	2490	1574	1844	541	470	1791
chr8	28011853	28023673	iso_7420	1740	1375	2484	2982	803	554	1093	651	914	228	802	3308
chr8	28011853	28023673	iso_7419	1740	1375	2484	2982	803	554	1093	651	914	228	802	3308
chr8	28724668	28728045	iso_7429	103	114	230	306	75	52	94	67	102	27	88	261
chr8	28729037	28733357	iso_7430	804	512	861	1052	855	802	1847	1166	974	1088	891	953
chr9	297587	298006	iso_7447	4	0	3	4	3	3	5	1	2	0	3	67
chr9	364332	367096	iso_7448	780	691	3074	2710	145	93	133	186	50	26	563	669
chr9	3895952	3901073	iso_7468	444	334	678	898	441	595	730	602	451	382	546	839
chr9	3970478	3972191	iso_7470	134	111	130	110	221	395	286	347	66	240	145	132
chr9	4181939	4184198	iso_7474	62	53	47	47	17	11	61	30	22	4	683	1488
chr9	4201908	4206499	iso_7475	427	296	490	515	258	368	711	725	460	703	702	462
chr9	4341464	4345572	iso_7481	15002	9271	7908	8041	18	14	53	55	35	25	597	489
chr9	4398478	4407859	iso_7483	560	376	799	996	213	172	1016	794	404	539	643	335
chr9	4398478	4407859	iso_7482	560	376	799	996	213	172	1016	794	404	539	643	335
chr9	4398478	4407859	iso_7484	560	376	799	996	213	172	1016	794	404	539	643	335
chr9	4641404	4645281	iso_7494	1363	969	111	143	18	16	17	15	3	2	8	8
chr9	4660737	4664802	iso_7495	534	392	505	608	698	402	2678	1619	316	228	589	797
chr9	4716777	4723713	iso_8362	197	219	1846	3129	106	241	162	102	81	48	179	346
chr9	4716789	4723713	iso_9293	197	219	1846	3129	106	241	162	102	81	48	179	346
chr9	4724164	4727078	iso_7496	588	419	705	1087	312	385	373	159	265	152	722	1602
chr9	4729404	4734276	iso_7497	56	33	86	75	4731	2903	38	138	24	15	192	135
chr9	11931407	11934935	iso_7536	488	323	543	595	144	126	824	600	732	542	556	758
chr9	12623810	12626411	iso_7547	875	620	1171	1275	101	76	28	27	301	73	59	35
chr9	14434287	14436818	iso_7554	344	200	779	787	23	30	114	114	30	39	37	40
chr9	14464527	14465116	iso_7555	0	0	0	0	2	21	10630	5290	1	0	1	1
chr9	14474940	14477679	iso_9021	24	23	34	70	261	290	2073	2205	106	165	137	82
chr9	14598112	14600616	iso_9342	914	573	1305	985	3056	2658	2564	4005	2868	4153	8233	4268
chr9	14598112	14600972	iso_8864	916	574	1313	994	3065	2665	2568	4012	2875	4156	8245	4283
chr9	14750386	14753445	iso_9217	1305	1044	1263	1476	1218	1059	2272	1510	2276	678	1169	4358
chr9	14750386	14755247	iso_7563	1769	1456	1741	1992	1790	1370	3455	1972	3727	865	1463	7068
chr9	14769492	14775345	iso_7564	179	125	393	587	1132	2108	81	73	25	16	266	195
chr9	14804111	14807864	iso_7566	1758	1141	2810	2456	2544	1774	4895	1928	4104	1365	1036	4183
chr9	14804111	14807864	iso_8544	1758	1141	2810	2456	2544	1774	4895	1928	4104	1365	1036	4183
chr9	14804111	14807864	iso_7565	1758	1141	2810	2456	2544	1774	4895	1928	4104	1365	1036	4183
chr9	15326050	15326936	iso_7577	36	25	24	32	21	26	83	75	50	25	257	371
chr9	15340409	15342372	iso_7579	141	86	133	112	146	110	231	227	213	222	455	358
chr9	15378644	15387286	iso_7581	2398	1430	1833	2092	2555	2825	5111	3203	5196	3331	1837	3246
chr9	15394087	15395412	iso_7584	174	81	168	122	6225	20219	8	11	6	5	20	2
chr9	15394139	15395440	iso_7583	165	76	164	119	6225	20219	9	13	7	7	21	2
chr9	15396056	15397273	iso_7585	24	10	83	61	20	28	236	176	111	146	51	42
chr9	15422032	15423998	iso_7588	208	101	197	133	310	302	201	233	213	213	941	473
chr9	15422032	15423998	iso_7587	208	101	197	133	310	302	201	233	213	213	941	473
chr9	15671694	15678580	iso_7591	9159	7756	9477	11401	4516	4392	7130	7668	9056	3921	2151	4668
chr9	15671694	15678580	iso_9242	9159	7756	9477	11401	4516	4392	7130	7668	9056	3921	2151	4668
chr9	15676224	15678580	iso_7592	2948	2870	2638	4011	1801	1825	2668	3033	3871	1535	687	1906
chr9	15905448	15923902	iso_7597	976	852	2674	3447	602	563	515	613	515	217	1111	2553
chr9	16559425	16563390	iso_7598	246	146	214	185	264	225	649	305	548	197	257	454
chr9	16559933	16563390	iso_7599	224	137	206	178	261	214	645	302	547	196	132	429
chr9	16565590	16576061	iso_9368	1219	999	2012	2360	1959	1653	1011	1107	968	367	1445	4040
chr9	16907854	16910702	iso_7601	89	69	92	125	204	145	135	90	207	47	243	953
chr9	18760145	18767086	iso_7609	465	215	417	373	398	220	4677	1233	4305	3643	138	154
chr9	19136989	19171163	iso_7610	6095	4282	8590	9149	819	641	286	234	243	75	439	785
chr9	21620417	21626961	iso_7625	115	92	125	192	283	248	212	390	261	124	416	814
chr9	21769127	21769713	iso_7631	1	2	1	1	89	125	0	0	0	2	2	1
chr9	21873498	21877415	iso_7632	208	206	279	405	213	175	268	381	356	184	324	702
chr9	21931812	21933447	iso_7634	240	134	275	188	343	402	357	245	445	314	623	317
chr9	23254396	23259261	iso_7656	498	339	469	702	330	285	321	389	318	200	453	592
chrZ	888557	891629	iso_7858	218	312	456	699	120	105	195	232	122	97	116	285
chrZ	1078235	1081529	iso_7863	1171	1561	995	2238	3094	4413	2357	5577	1517	3599	5615	2373
chrZ	1078523	1081529	iso_7864	1165	1556	994	2229	3092	4400	2352	5570	1514	3590	5599	2366
chrZ	1081761	1086259	iso_7865	523	841	491	1042	127	201	305	665	295	186	216	657
chrZ	1754070	1756906	iso_8885	180	165	254	336	274	276	335	420	370	241	723	748
chrZ	7768022	7770168	iso_7880	134	201	182	368	147	288	164	513	282	407	468	582
chrZ	8229242	8231931	iso_7884	9	32	2	32	76	158	297	1568	216	126	186	553
chrZ	8387088	8397085	iso_7885	328	480	193	237	1326	6293	189	522	153	134	346	369
chrZ	8852884	8858852	iso_7891	1872	1471	1291	1640	1108	2714	57	125	36	68	558	464
chrZ	8949365	8950284	iso_7894	15	19	24	53	15	28	20	42	18	49	227	128
chrZ	8995512	8996444	iso_7895	0	2	0	0	3	40	23946	33430	11	302	48	15
chrZ	9026470	9031085	iso_9160	426	561	483	925	354	667	860	1337	846	1052	778	709
chrZ	9071411	9077157	iso_7897	757	761	1254	1743	1528	2719	1601	1654	521	634	1265	3130
chrZ	9555652	9558793	iso_7903	76	77	38	119	17	66	101	94	54	134	965	809
chrZ	11388004	11389523	iso_7920	3	5	6	7	3	1	2	5	9	1	28	195
chrZ	13514274	13522432	iso_7929	2019	997	862	800	427	510	310	353	5381	8341	852	1709
chrZ	13514274	13524233	iso_7930	2047	1017	870	809	427	512	311	354	5393	8576	2065	3266
chrZ	13514274	13524233	iso_7931	2047	1017	870	809	427	512	311	354	5393	8576	2065	3266
[truncated: 19 more rows]
